# Supplementary material for: A Network Pharmacology Approach to Explore Mechanism of Action of Longzuan Tongbi Formula on Rheumatoid Arthritis
Source: Evid Based Complement Alternat Med. 2019 Jan 17;2019:5191362. doi: 10.1155/2019/5191362 (PMC6354157; doi:10.1155/2019/5191362)
Supplement: Supplementary 2 — Table S02-1: Cluster 1 data of biological process (BP) enrichment analysis of RA target network. Table S02-2: Cluster 2 data of biological process (BP) enrichment analysis of RA target network. Table S02-3: Cluster 3 data of biological process (BP) enrichment analysis of RA target network. Table S02-4: Cluster 4 data of biological process (BP) enrichment analysis of RA target network. Table S02-5: Cluster 5 data of biological process (BP) enrichment analysis of RA target network. [file 5191362.f2.xlsx]

## Sheet: Table S02-1
ID	Description	P_value
GO:0070098	chemokine-mediated signaling pathway	4.4893e-53
GO:0030595	leukocyte chemotaxis	5.16583e-47
GO:0060326	cell chemotaxis	9.56733e-47
GO:0050900	leukocyte migration	1.10069e-38
GO:0002685	regulation of leukocyte migration	2.08646e-36
GO:0006874	cellular calcium ion homeostasis	5.80936e-35
GO:0055074	calcium ion homeostasis	1.27812e-34
GO:0007204	positive regulation of cytosolic calcium ion concentration	4.10077e-34
GO:0072503	cellular divalent inorganic cation homeostasis	7.59647e-34
GO:0072507	divalent inorganic cation homeostasis	2.45323e-33
GO:0051480	regulation of cytosolic calcium ion concentration	6.01979e-33
GO:0050921	positive regulation of chemotaxis	1.27221e-31
GO:0050920	regulation of chemotaxis	4.91164e-31
GO:0002687	positive regulation of leukocyte migration	3.81579e-30
GO:0002690	positive regulation of leukocyte chemotaxis	3.80086e-29
GO:0002688	regulation of leukocyte chemotaxis	4.51382e-29
GO:0032103	positive regulation of response to external stimulus	2.3945e-27
GO:0097529	myeloid leukocyte migration	5.31036e-25
GO:0072678	T cell migration	1.19091e-24
GO:0072676	lymphocyte migration	1.95666e-24
GO:0030335	positive regulation of cell migration	1.33851e-23
GO:0048247	lymphocyte chemotaxis	2.26707e-19
GO:0071621	granulocyte chemotaxis	4.90475e-18
GO:0002407	dendritic cell chemotaxis	9.19123e-18
GO:0097530	granulocyte migration	2.66151e-17
GO:0030593	neutrophil chemotaxis	3.12794e-17
GO:0036336	dendritic cell migration	5.22318e-17
GO:1990266	neutrophil migration	1.3741e-16
GO:2000404	regulation of T cell migration	4.23918e-16
GO:0071674	mononuclear cell migration	5.73335e-16
GO:0010818	T cell chemotaxis	2.10983e-15
GO:0002548	monocyte chemotaxis	2.83024e-15
GO:2000406	positive regulation of T cell migration	4.63249e-15
GO:0007187	G-protein coupled receptor signaling pathway, coupled to cyclic nucleotide second messenger	8.98904e-15
GO:0071622	regulation of granulocyte chemotaxis	1.45032e-14
GO:2000401	regulation of lymphocyte migration	2.1766e-14
GO:0090023	positive regulation of neutrophil chemotaxis	2.47794e-14
GO:2000403	positive regulation of lymphocyte migration	3.33209e-14
GO:0032496	response to lipopolysaccharide	3.39653e-14
GO:0071624	positive regulation of granulocyte chemotaxis	4.43248e-14
GO:1902624	positive regulation of neutrophil migration	5.83731e-14
GO:0002237	response to molecule of bacterial origin	7.43259e-14
GO:0090022	regulation of neutrophil chemotaxis	9.84933e-14
GO:1902622	regulation of neutrophil migration	2.03232e-13
GO:0090026	positive regulation of monocyte chemotaxis	7.41817e-12
GO:0006968	cellular defense response	8.77675e-12
GO:1903236	regulation of leukocyte tethering or rolling	1.23179e-11
GO:0071675	regulation of mononuclear cell migration	1.96375e-11
GO:0071677	positive regulation of mononuclear cell migration	3.22235e-11
GO:0090025	regulation of monocyte chemotaxis	4.42041e-11
GO:0019932	second-messenger-mediated signaling	3.81329e-10
GO:0030799	regulation of cyclic nucleotide metabolic process	9.18267e-10
GO:0030814	regulation of cAMP metabolic process	3.74434e-09
GO:1904994	regulation of leukocyte adhesion to vascular endothelial cell	4.34326e-09
GO:0002692	negative regulation of cellular extravasation	5.42342e-09
GO:0002691	regulation of cellular extravasation	7.1488e-09
GO:0050901	leukocyte tethering or rolling	9.00918e-09
GO:0000187	activation of MAPK activity	1.43709e-08
GO:0009187	cyclic nucleotide metabolic process	1.43709e-08
GO:0050918	positive chemotaxis	2.44854e-08
GO:1904995	negative regulation of leukocyte adhesion to vascular endothelial cell	2.53942e-08
GO:0046058	cAMP metabolic process	3.0287e-08
GO:0051928	positive regulation of calcium ion transport	3.68442e-08
GO:0010819	regulation of T cell chemotaxis	3.80049e-08
GO:0002683	negative regulation of immune system process	5.34791e-08
GO:0061756	leukocyte adhesion to vascular endothelial cell	7.77178e-08
GO:0002686	negative regulation of leukocyte migration	1.02999e-07
GO:1900542	regulation of purine nucleotide metabolic process	1.2431e-07
GO:0045765	regulation of angiogenesis	1.38003e-07
GO:0006140	regulation of nucleotide metabolic process	1.63237e-07
GO:0043949	regulation of cAMP-mediated signaling	1.72948e-07
GO:0062012	regulation of small molecule metabolic process	1.97944e-07
GO:2000106	regulation of leukocyte apoptotic process	2.08371e-07
GO:1901342	regulation of vasculature development	2.85905e-07
GO:0006925	inflammatory cell apoptotic process	3.653e-07
GO:2000107	negative regulation of leukocyte apoptotic process	3.81455e-07
GO:0043950	positive regulation of cAMP-mediated signaling	4.50231e-07
GO:0045123	cellular extravasation	4.67738e-07
GO:1901623	regulation of lymphocyte chemotaxis	5.49036e-07
GO:0032147	activation of protein kinase activity	6.02967e-07
GO:0070374	positive regulation of ERK1 and ERK2 cascade	6.10696e-07
GO:0071887	leukocyte apoptotic process	6.61871e-07
GO:0030801	positive regulation of cyclic nucleotide metabolic process	6.86298e-07
GO:0010517	regulation of phospholipase activity	8.97717e-07
GO:0007200	phospholipase C-activating G-protein coupled receptor signaling pathway	1.21041e-06
GO:0043406	positive regulation of MAP kinase activity	1.44535e-06
GO:0033032	regulation of myeloid cell apoptotic process	1.51602e-06
GO:0007188	adenylate cyclase-modulating G-protein coupled receptor signaling pathway	2.35429e-06
GO:0045785	positive regulation of cell adhesion	2.63296e-06
GO:0010574	regulation of vascular endothelial growth factor production	2.63853e-06
GO:0033028	myeloid cell apoptotic process	2.63853e-06
GO:0010573	vascular endothelial growth factor production	3.38741e-06
GO:0030816	positive regulation of cAMP metabolic process	3.38741e-06
GO:0048246	macrophage chemotaxis	3.38741e-06
GO:0050727	regulation of inflammatory response	3.87399e-06
GO:0006816	calcium ion transport	4.02997e-06
GO:0070372	regulation of ERK1 and ERK2 cascade	4.3631e-06
GO:0010820	positive regulation of T cell chemotaxis	4.38773e-06
GO:0060191	regulation of lipase activity	5.69527e-06
GO:0003376	sphingosine-1-phosphate signaling pathway	5.83764e-06
GO:0090520	sphingolipid mediated signaling pathway	5.83764e-06
GO:0019933	cAMP-mediated signaling	6.04544e-06
GO:0051924	regulation of calcium ion transport	6.12072e-06
GO:0070371	ERK1 and ERK2 cascade	6.44953e-06
GO:1905517	macrophage migration	6.58522e-06
GO:0006959	humoral immune response	6.59486e-06
GO:0045981	positive regulation of nucleotide metabolic process	6.76938e-06
GO:1900544	positive regulation of purine nucleotide metabolic process	6.76938e-06
GO:0043270	positive regulation of ion transport	8.08558e-06
GO:0019935	cyclic-nucleotide-mediated signaling	9.09831e-06
GO:0043405	regulation of MAP kinase activity	9.13127e-06
GO:0070838	divalent metal ion transport	9.28751e-06
GO:0001780	neutrophil homeostasis	9.61687e-06
GO:0072511	divalent inorganic cation transport	9.95745e-06
GO:0062013	positive regulation of small molecule metabolic process	1.12283e-05
GO:0071902	positive regulation of protein serine/threonine kinase activity	1.14774e-05
GO:0019722	calcium-mediated signaling	1.32968e-05
GO:0033033	negative regulation of myeloid cell apoptotic process	1.47312e-05
GO:0140131	positive regulation of lymphocyte chemotaxis	1.47312e-05
GO:0010518	positive regulation of phospholipase activity	1.4959e-05
GO:0033630	positive regulation of cell adhesion mediated by integrin	1.78492e-05
GO:0042119	neutrophil activation	1.80944e-05
GO:0022407	regulation of cell-cell adhesion	2.17843e-05
GO:0051209	release of sequestered calcium ion into cytosol	2.31972e-05
GO:0051283	negative regulation of sequestering of calcium ion	2.31972e-05
GO:1903038	negative regulation of leukocyte cell-cell adhesion	2.31972e-05
GO:0051282	regulation of sequestering of calcium ion	2.42151e-05
GO:0045766	positive regulation of angiogenesis	2.63787e-05
GO:0051208	sequestering of calcium ion	2.74785e-05
GO:0001819	positive regulation of cytokine production	3.2859e-05
GO:0002438	acute inflammatory response to antigenic stimulus	3.46097e-05
GO:1903037	regulation of leukocyte cell-cell adhesion	3.55804e-05
GO:0060193	positive regulation of lipase activity	3.82433e-05
GO:0010758	regulation of macrophage chemotaxis	3.99877e-05
GO:0097553	calcium ion transmembrane import into cytosol	4.40867e-05
GO:0050769	positive regulation of neurogenesis	4.52583e-05
GO:0002526	acute inflammatory response	4.82797e-05
GO:1904018	positive regulation of vasculature development	4.82797e-05
GO:0007202	activation of phospholipase C activity	5.23282e-05
GO:0050927	positive regulation of positive chemotaxis	5.93352e-05
GO:0050926	regulation of positive chemotaxis	6.69296e-05
GO:1905521	regulation of macrophage migration	6.69296e-05
GO:0007159	leukocyte cell-cell adhesion	6.85407e-05
GO:0032652	regulation of interleukin-1 production	6.89518e-05
GO:0010575	positive regulation of vascular endothelial growth factor production	7.51329e-05
GO:0060402	calcium ion transport into cytosol	7.98197e-05
GO:0072679	thymocyte migration	9.13054e-05
GO:0097350	neutrophil clearance	9.13054e-05
GO:0010959	regulation of metal ion transport	0.000113147
GO:0032612	interleukin-1 production	0.000114605
GO:0060401	cytosolic calcium ion transport	0.000116163
GO:0051962	positive regulation of nervous system development	0.00011759
GO:0022408	negative regulation of cell-cell adhesion	0.000123284
GO:0002446	neutrophil mediated immunity	0.000129595
GO:0033029	regulation of neutrophil apoptotic process	0.000136689
GO:2000110	negative regulation of macrophage apoptotic process	0.000136689
GO:0042063	gliogenesis	0.00013763
GO:0010863	positive regulation of phospholipase C activity	0.000138338
GO:0046883	regulation of hormone secretion	0.00014054
GO:0030815	negative regulation of cAMP metabolic process	0.000151398
GO:0051482	positive regulation of cytosolic calcium ion concentration involved in phospholipase C-activating G-protein coupled signaling pathway	0.000151398
GO:0007193	adenylate cyclase-inhibiting G-protein coupled receptor signaling pathway	0.000157474
GO:1900274	regulation of phospholipase C activity	0.000165233
GO:0007618	mating	0.000179865
GO:0030800	negative regulation of cyclic nucleotide metabolic process	0.000179865
GO:0071222	cellular response to lipopolysaccharide	0.000187943
GO:0001781	neutrophil apoptotic process	0.000190989
GO:0002866	positive regulation of acute inflammatory response to antigenic stimulus	0.000190989
GO:0019064	fusion of virus membrane with host plasma membrane	0.000190989
GO:0038171	cannabinoid signaling pathway	0.000190989
GO:0039663	membrane fusion involved in viral entry into host cell	0.000190989
GO:0044800	multi-organism membrane fusion	0.000190989
GO:2000669	negative regulation of dendritic cell apoptotic process	0.000190989
GO:0019233	sensory perception of pain	0.000202561
GO:0051281	positive regulation of release of sequestered calcium ion into cytosol	0.000211596
GO:0071219	cellular response to molecule of bacterial origin	0.000231597
GO:0033628	regulation of cell adhesion mediated by integrin	0.000246746
GO:0033632	regulation of cell-cell adhesion mediated by integrin	0.000254153
GO:0044803	multi-organism membrane organization	0.000254153
GO:2000508	regulation of dendritic cell chemotaxis	0.000254153
GO:2000510	positive regulation of dendritic cell chemotaxis	0.000254153
GO:0030336	negative regulation of cell migration	0.000277492
GO:0034341	response to interferon-gamma	0.000289513
GO:0070555	response to interleukin-1	0.000296569
GO:0002437	inflammatory response to antigenic stimulus	0.000306216
GO:0046879	hormone secretion	0.000331459
GO:2000146	negative regulation of cell motility	0.000361366
GO:0001954	positive regulation of cell-matrix adhesion	0.000374226
GO:0002460	adaptive immune response based on somatic recombination of immune receptors built from immunoglobulin superfamily domains	0.000380302
GO:0051235	maintenance of location	0.000380302
GO:0071216	cellular response to biotic stimulus	0.000391832
GO:0009914	hormone transport	0.00040675
GO:0002863	positive regulation of inflammatory response to antigenic stimulus	0.000406859
GO:0097048	dendritic cell apoptotic process	0.000406859
GO:2000109	regulation of macrophage apoptotic process	0.000406859
GO:2000668	regulation of dendritic cell apoptotic process	0.000406859
GO:0050433	regulation of catecholamine secretion	0.000424553
GO:0032640	tumor necrosis factor production	0.000448861
GO:0006898	receptor-mediated endocytosis	0.000494826
GO:0032060	bleb assembly	0.000496297
GO:0033004	negative regulation of mast cell activation	0.000496297
GO:0051001	negative regulation of nitric-oxide synthase activity	0.000496297
GO:0050432	catecholamine secretion	0.000507877
GO:0010524	positive regulation of calcium ion transport into cytosol	0.000537809
GO:0003158	endothelium development	0.000542275
GO:0062014	negative regulation of small molecule metabolic process	0.000542275
GO:0071706	tumor necrosis factor superfamily cytokine production	0.000542275
GO:0002920	regulation of humoral immune response	0.00057627
GO:0051271	negative regulation of cellular component movement	0.000579038
GO:0002430	complement receptor mediated signaling pathway	0.000594389
GO:0002864	regulation of acute inflammatory response to antigenic stimulus	0.000594389
GO:0010759	positive regulation of macrophage chemotaxis	0.000594389
GO:0033631	cell-cell adhesion mediated by integrin	0.000594389
GO:0045759	negative regulation of action potential	0.000594389
GO:0048143	astrocyte activation	0.000594389
GO:0071888	macrophage apoptotic process	0.000594389
GO:1901550	regulation of endothelial cell development	0.000594389
GO:1903140	regulation of establishment of endothelial barrier	0.000594389
GO:0043312	neutrophil degranulation	0.000655847
GO:0033627	cell adhesion mediated by integrin	0.000668774
GO:0002283	neutrophil activation involved in immune response	0.000680165
GO:0033604	negative regulation of catecholamine secretion	0.000701083
GO:1905523	positive regulation of macrophage migration	0.000701083
GO:0014015	positive regulation of gliogenesis	0.000704407
GO:1900543	negative regulation of purine nucleotide metabolic process	0.000704407
GO:0040013	negative regulation of locomotion	0.000704752
GO:0045980	negative regulation of nucleotide metabolic process	0.000741228
GO:0002829	negative regulation of type 2 immune response	0.000816328
GO:0006957	complement activation, alternative pathway	0.000816328
GO:0002827	positive regulation of T-helper 1 type immune response	0.000940071
GO:0032769	negative regulation of monooxygenase activity	0.000940071
GO:0051937	catecholamine transport	0.000987992
GO:1904427	positive regulation of calcium ion transmembrane transport	0.00103357
GO:0007162	negative regulation of cell adhesion	0.00107379
GO:0002673	regulation of acute inflammatory response	0.00111086
GO:0022409	positive regulation of cell-cell adhesion	0.00111178
GO:0002695	negative regulation of leukocyte activation	0.00125512
GO:0043547	positive regulation of GTPase activity	0.00146822
GO:0002544	chronic inflammatory response	0.00151902
GO:0007617	mating behavior	0.00151902
GO:0033622	integrin activation	0.00151902
GO:0015844	monoamine transport	0.00156373
GO:1901739	regulation of myoblast fusion	0.00168449
GO:0002824	positive regulation of adaptive immune response based on somatic recombination of immune receptors built from immunoglobulin superfamily domains	0.00168672
GO:0051279	regulation of release of sequestered calcium ion into cytosol	0.00168672
GO:0051952	regulation of amine transport	0.00168672
GO:0061097	regulation of protein tyrosine kinase activity	0.00168672
GO:0030802	regulation of cyclic nucleotide biosynthetic process	0.00175041
GO:0071347	cellular response to interleukin-1	0.00180459
GO:0071346	cellular response to interferon-gamma	0.00184366
GO:0050708	regulation of protein secretion	0.00185006
GO:0002861	regulation of inflammatory response to antigenic stimulus	0.00185816
GO:0050866	negative regulation of cell activation	0.00192356
GO:0002821	positive regulation of adaptive immune response	0.00195047
GO:0042742	defense response to bacterium	0.00198064
GO:0002825	regulation of T-helper 1 type immune response	0.00203998
GO:0023061	signal release	0.00205533
GO:0001776	leukocyte homeostasis	0.00216424
GO:0015837	amine transport	0.00216424
GO:0051953	negative regulation of amine transport	0.0022299
GO:0034612	response to tumor necrosis factor	0.00235815
GO:1903531	negative regulation of secretion by cell	0.00235938
GO:0070588	calcium ion transmembrane transport	0.0024602
GO:0009615	response to virus	0.00252999
GO:0034764	positive regulation of transmembrane transport	0.00255132
GO:0002791	regulation of peptide secretion	0.00257312
GO:0001774	microglial cell activation	0.00263382
GO:1904646	cellular response to amyloid-beta	0.00263382
GO:0042110	T cell activation	0.00280569
GO:0050679	positive regulation of epithelial cell proliferation	0.00280603
GO:0060142	regulation of syncytium formation by plasma membrane fusion	0.00284772
GO:0014812	muscle cell migration	0.00289095
GO:0021782	glial cell development	0.00297985
GO:0048668	collateral sprouting	0.00306953
GO:1904645	response to amyloid-beta	0.00306953
GO:0010001	glial cell differentiation	0.00307769
GO:0042102	positive regulation of T cell proliferation	0.00316266
GO:0010522	regulation of calcium ion transport into cytosol	0.00325659
GO:0002675	positive regulation of acute inflammatory response	0.00329919
GO:0050482	arachidonic acid secretion	0.00329919
GO:1903963	arachidonate transport	0.00329919
GO:2000108	positive regulation of leukocyte apoptotic process	0.00329919
GO:0030073	insulin secretion	0.00336683
GO:0043087	regulation of GTPase activity	0.00342133
GO:0002521	leukocyte differentiation	0.00345631
GO:0007176	regulation of epidermal growth factor-activated receptor activity	0.00353665
GO:0007194	negative regulation of adenylate cyclase activity	0.00353665
GO:0010800	positive regulation of peptidyl-threonine phosphorylation	0.00353665
GO:0014046	dopamine secretion	0.00353665
GO:0014059	regulation of dopamine secretion	0.00353665
GO:0019098	reproductive behavior	0.00353665
GO:0032743	positive regulation of interleukin-2 production	0.00353665
GO:0045920	negative regulation of exocytosis	0.00353665
GO:1902903	regulation of supramolecular fiber organization	0.00357399
GO:0031532	actin cytoskeleton reorganization	0.0036494
GO:0007584	response to nutrient	0.003674
GO:0051048	negative regulation of secretion	0.00373764
GO:0002828	regulation of type 2 immune response	0.00378187
GO:0030818	negative regulation of cAMP biosynthetic process	0.00378187
GO:0043552	positive regulation of phosphatidylinositol 3-kinase activity	0.00378187
GO:0051354	negative regulation of oxidoreductase activity	0.00378187
GO:0052652	cyclic purine nucleotide metabolic process	0.00385619
GO:0045666	positive regulation of neuron differentiation	0.00390132
GO:0009190	cyclic nucleotide biosynthetic process	0.00396222
GO:0014002	astrocyte development	0.00403479
GO:0031280	negative regulation of cyclase activity	0.00403479
GO:0061900	glial cell activation	0.00403479
GO:0050870	positive regulation of T cell activation	0.00406713
GO:0007218	neuropeptide signaling pathway	0.00407001
GO:0014013	regulation of gliogenesis	0.00407001
GO:0045446	endothelial cell differentiation	0.00407001
GO:0001952	regulation of cell-matrix adhesion	0.00417957
GO:0010811	positive regulation of cell-substrate adhesion	0.00429092
GO:0030449	regulation of complement activation	0.00429092
GO:0008038	neuron recognition	0.00429538
GO:0030803	negative regulation of cyclic nucleotide biosynthetic process	0.00429538
GO:0032228	regulation of synaptic transmission, GABAergic	0.00429538
GO:0002696	positive regulation of leukocyte activation	0.0043012
GO:2000257	regulation of protein activation cascade	0.00440405
GO:0031346	positive regulation of cell projection organization	0.00440559
GO:0060560	developmental growth involved in morphogenesis	0.00441579
GO:0043114	regulation of vascular permeability	0.00456357
GO:0051350	negative regulation of lyase activity	0.00456357
GO:0090218	positive regulation of lipid kinase activity	0.00456357
GO:1903039	positive regulation of leukocyte cell-cell adhesion	0.00486022
GO:0050867	positive regulation of cell activation	0.00495492
GO:0032680	regulation of tumor necrosis factor production	0.00512096
GO:0019216	regulation of lipid metabolic process	0.00512883
GO:0015850	organic hydroxy compound transport	0.00517268
GO:1903555	regulation of tumor necrosis factor superfamily cytokine production	0.00563575
GO:0042092	type 2 immune response	0.00571154
GO:0045777	positive regulation of blood pressure	0.00571154
GO:0002822	regulation of adaptive immune response based on somatic recombination of immune receptors built from immunoglobulin superfamily domains	0.00590438
GO:0048872	homeostasis of number of cells	0.00601229
GO:0045687	positive regulation of glial cell differentiation	0.00601709
GO:0098815	modulation of excitatory postsynaptic potential	0.00601709
GO:0007520	myoblast fusion	0.00632997
GO:0030225	macrophage differentiation	0.00632997
GO:0033003	regulation of mast cell activation	0.00632997
GO:0042088	T-helper 1 type immune response	0.00632997
GO:0061028	establishment of endothelial barrier	0.00632997
GO:0030072	peptide hormone secretion	0.0064643
GO:0045834	positive regulation of lipid metabolic process	0.00646441
GO:0050729	positive regulation of inflammatory response	0.00646441
GO:1904064	positive regulation of cation transmembrane transport	0.00646441
GO:0014911	positive regulation of smooth muscle cell migration	0.00665014
GO:0045761	regulation of adenylate cyclase activity	0.00665014
GO:0010799	regulation of peptidyl-threonine phosphorylation	0.00697755
GO:0002576	platelet degranulation	0.00705516
GO:0015872	dopamine transport	0.00731216
GO:0032309	icosanoid secretion	0.00731216
GO:0002819	regulation of adaptive immune response	0.00751861
GO:0110053	regulation of actin filament organization	0.00753717
GO:0019835	cytolysis	0.00765391
GO:0032732	positive regulation of interleukin-1 production	0.00765391
GO:0045601	regulation of endothelial cell differentiation	0.00765391
GO:1903727	positive regulation of phospholipid metabolic process	0.00765391
GO:0050671	positive regulation of lymphocyte proliferation	0.00767702
GO:0021700	developmental maturation	0.0077441
GO:0002697	regulation of immune effector process	0.00780191
GO:0032946	positive regulation of mononuclear cell proliferation	0.00783739
GO:1902107	positive regulation of leukocyte differentiation	0.00783739
GO:0010976	positive regulation of neuron projection development	0.00816915
GO:0034767	positive regulation of ion transmembrane transport	0.00833038
GO:0002886	regulation of myeloid leukocyte mediated immunity	0.00835868
GO:0043551	regulation of phosphatidylinositol 3-kinase activity	0.00835868
GO:0044764	multi-organism cellular process	0.00835868
GO:0071715	icosanoid transport	0.00835868
GO:1901571	fatty acid derivative transport	0.00835868
GO:0051932	synaptic transmission, GABAergic	0.00872161
GO:0061098	positive regulation of protein tyrosine kinase activity	0.00872161
GO:0002262	myeloid cell homeostasis	0.00884129
GO:0070665	positive regulation of leukocyte proliferation	0.0090156
GO:0030809	negative regulation of nucleotide biosynthetic process	0.00909151
GO:0050999	regulation of nitric-oxide synthase activity	0.00909151
GO:1900372	negative regulation of purine nucleotide biosynthetic process	0.00909151
GO:0006953	acute-phase response	0.00946833
GO:1903169	regulation of calcium ion transmembrane transport	0.00973299
GO:0032663	regulation of interleukin-2 production	0.0102426
GO:0045661	regulation of myoblast differentiation	0.0102426
GO:0046635	positive regulation of alpha-beta T cell activation	0.0102426
GO:0002763	positive regulation of myeloid leukocyte differentiation	0.0106399
GO:0042129	regulation of T cell proliferation	0.0106754
GO:0000768	syncytium formation by plasma membrane fusion	0.011044
GO:0009314	response to radiation	0.0111211
GO:0071356	cellular response to tumor necrosis factor	0.0114436
GO:0043550	regulation of lipid kinase activity	0.0114548
GO:0098900	regulation of action potential	0.0114548
GO:1900371	regulation of purine nucleotide biosynthetic process	0.0114663
GO:0030808	regulation of nucleotide biosynthetic process	0.0116692
GO:0001885	endothelial cell development	0.0118722
GO:0006949	syncytium formation	0.0118722
GO:0050922	negative regulation of chemotaxis	0.0118722

## Sheet: Table S02-2
ID	Description	P_value
GO:0002576	platelet degranulation	9.154e-50
GO:0050878	regulation of body fluid levels	3.97077e-18
GO:0030335	positive regulation of cell migration	5.29324e-17
GO:0007596	blood coagulation	1.46127e-15
GO:0007599	hemostasis	1.83618e-15
GO:0050817	coagulation	1.92118e-15
GO:0032103	positive regulation of response to external stimulus	2.94423e-15
GO:0008217	regulation of blood pressure	2.99766e-15
GO:0007200	phospholipase C-activating G-protein coupled receptor signaling pathway	2.1796e-14
GO:0003018	vascular process in circulatory system	4.11958e-14
GO:0002687	positive regulation of leukocyte migration	5.65525e-14
GO:0050900	leukocyte migration	2.12612e-13
GO:0051047	positive regulation of secretion	2.20577e-13
GO:0070371	ERK1 and ERK2 cascade	4.15127e-13
GO:1903524	positive regulation of blood circulation	4.57021e-13
GO:0006939	smooth muscle contraction	5.065e-13
GO:0060326	cell chemotaxis	8.06915e-13
GO:0030193	regulation of blood coagulation	1.25921e-12
GO:1900046	regulation of hemostasis	1.25921e-12
GO:1903532	positive regulation of secretion by cell	1.52438e-12
GO:0007204	positive regulation of cytosolic calcium ion concentration	2.15811e-12
GO:0050818	regulation of coagulation	2.5086e-12
GO:0002685	regulation of leukocyte migration	2.99411e-12
GO:0002690	positive regulation of leukocyte chemotaxis	3.47218e-12
GO:0014065	phosphatidylinositol 3-kinase signaling	4.02064e-12
GO:0050921	positive regulation of chemotaxis	4.02064e-12
GO:0035296	regulation of tube diameter	4.34347e-12
GO:0097746	regulation of blood vessel diameter	4.34347e-12
GO:0098801	regulation of renal system process	5.09367e-12
GO:0043062	extracellular structure organization	5.12633e-12
GO:0045987	positive regulation of smooth muscle contraction	6.39993e-12
GO:0051480	regulation of cytosolic calcium ion concentration	7.32242e-12
GO:0050880	regulation of blood vessel size	7.88361e-12
GO:0035150	regulation of tube size	8.47158e-12
GO:0007217	tachykinin receptor signaling pathway	1.01258e-11
GO:0030198	extracellular matrix organization	1.3382e-11
GO:0030595	leukocyte chemotaxis	1.344e-11
GO:0048015	phosphatidylinositol-mediated signaling	2.83698e-11
GO:0002688	regulation of leukocyte chemotaxis	3.2446e-11
GO:0048017	inositol lipid-mediated signaling	3.42065e-11
GO:0003014	renal system process	3.81658e-11
GO:0051918	negative regulation of fibrinolysis	4.53639e-11
GO:0042310	vasoconstriction	5.22461e-11
GO:0070372	regulation of ERK1 and ERK2 cascade	7.95379e-11
GO:0050731	positive regulation of peptidyl-tyrosine phosphorylation	9.77318e-11
GO:0030194	positive regulation of blood coagulation	1.06726e-10
GO:1900048	positive regulation of hemostasis	1.06726e-10
GO:0001818	negative regulation of cytokine production	1.07562e-10
GO:0045933	positive regulation of muscle contraction	1.14655e-10
GO:0097756	negative regulation of blood vessel diameter	1.18665e-10
GO:0030195	negative regulation of blood coagulation	1.32598e-10
GO:1900047	negative regulation of hemostasis	1.32598e-10
GO:0042730	fibrinolysis	1.36912e-10
GO:0050820	positive regulation of coagulation	1.36912e-10
GO:0006874	cellular calcium ion homeostasis	1.78017e-10
GO:0061041	regulation of wound healing	1.78057e-10
GO:0001667	ameboidal-type cell migration	2.11961e-10
GO:0055074	calcium ion homeostasis	2.44645e-10
GO:0050819	negative regulation of coagulation	2.62665e-10
GO:0043406	positive regulation of MAP kinase activity	2.8017e-10
GO:0050920	regulation of chemotaxis	3.20709e-10
GO:0006936	muscle contraction	3.30499e-10
GO:0051917	regulation of fibrinolysis	3.57203e-10
GO:0003012	muscle system process	4.15157e-10
GO:0002791	regulation of peptide secretion	4.75221e-10
GO:0072503	cellular divalent inorganic cation homeostasis	5.01385e-10
GO:0010634	positive regulation of epithelial cell migration	6.17927e-10
GO:0006940	regulation of smooth muscle contraction	7.72786e-10
GO:0072507	divalent inorganic cation homeostasis	8.03091e-10
GO:1903034	regulation of response to wounding	9.17401e-10
GO:0014068	positive regulation of phosphatidylinositol 3-kinase signaling	1.18694e-09
GO:0050730	regulation of peptidyl-tyrosine phosphorylation	1.51928e-09
GO:0061045	negative regulation of wound healing	1.60979e-09
GO:0070374	positive regulation of ERK1 and ERK2 cascade	1.64796e-09
GO:0010631	epithelial cell migration	2.07637e-09
GO:0097529	myeloid leukocyte migration	2.1215e-09
GO:0090132	epithelium migration	2.28674e-09
GO:0032147	activation of protein kinase activity	2.36099e-09
GO:0010951	negative regulation of endopeptidase activity	2.64447e-09
GO:0090130	tissue migration	2.76567e-09
GO:0050708	regulation of protein secretion	2.88177e-09
GO:0043434	response to peptide hormone	2.95879e-09
GO:0002793	positive regulation of peptide secretion	3.57665e-09
GO:0043405	regulation of MAP kinase activity	3.88229e-09
GO:0052547	regulation of peptidase activity	4.25069e-09
GO:0010466	negative regulation of peptidase activity	4.29774e-09
GO:0050886	endocrine process	4.42691e-09
GO:0045861	negative regulation of proteolysis	4.932e-09
GO:0045778	positive regulation of ossification	5.23927e-09
GO:1903035	negative regulation of response to wounding	5.23927e-09
GO:0071902	positive regulation of protein serine/threonine kinase activity	5.38688e-09
GO:0003044	regulation of systemic arterial blood pressure mediated by a chemical signal	6.15728e-09
GO:0010714	positive regulation of collagen metabolic process	7.41709e-09
GO:0032967	positive regulation of collagen biosynthetic process	7.41709e-09
GO:0003073	regulation of systemic arterial blood pressure	7.84248e-09
GO:1903522	regulation of blood circulation	1.0551e-08
GO:0090303	positive regulation of wound healing	1.12456e-08
GO:0002526	acute inflammatory response	1.16542e-08
GO:0072378	blood coagulation, fibrin clot formation	1.39941e-08
GO:0090066	regulation of anatomical structure size	1.40795e-08
GO:1901652	response to peptide	1.40795e-08
GO:0045785	positive regulation of cell adhesion	1.50217e-08
GO:0014066	regulation of phosphatidylinositol 3-kinase signaling	1.76152e-08
GO:0019229	regulation of vasoconstriction	2.1508e-08
GO:0031589	cell-substrate adhesion	2.60572e-08
GO:0052548	regulation of endopeptidase activity	2.6315e-08
GO:0050714	positive regulation of protein secretion	2.81106e-08
GO:0007588	excretion	3.19229e-08
GO:1903036	positive regulation of response to wounding	3.19229e-08
GO:0045907	positive regulation of vasoconstriction	4.05963e-08
GO:0035815	positive regulation of renal sodium excretion	4.69253e-08
GO:0046883	regulation of hormone secretion	6.21274e-08
GO:0002696	positive regulation of leukocyte activation	6.40257e-08
GO:0010934	macrophage cytokine production	6.55525e-08
GO:0051346	negative regulation of hydrolase activity	7.04224e-08
GO:0050678	regulation of epithelial cell proliferation	7.50255e-08
GO:0051051	negative regulation of transport	7.69363e-08
GO:0010632	regulation of epithelial cell migration	8.04315e-08
GO:0046887	positive regulation of hormone secretion	8.17676e-08
GO:0034330	cell junction organization	8.30211e-08
GO:0050867	positive regulation of cell activation	8.76605e-08
GO:0001990	regulation of systemic arterial blood pressure by hormone	9.71795e-08
GO:0032965	regulation of collagen biosynthetic process	9.71795e-08
GO:0034284	response to monosaccharide	1.07224e-07
GO:0018108	peptidyl-tyrosine phosphorylation	1.30981e-07
GO:0062012	regulation of small molecule metabolic process	1.31258e-07
GO:0018212	peptidyl-tyrosine modification	1.40931e-07
GO:0051048	negative regulation of secretion	1.56613e-07
GO:0010712	regulation of collagen metabolic process	1.61036e-07
GO:0051781	positive regulation of cell division	1.65501e-07
GO:0002367	cytokine production involved in immune response	1.77672e-07
GO:0007568	aging	1.9209e-07
GO:0032570	response to progesterone	2.03486e-07
GO:0060402	calcium ion transport into cytosol	2.14239e-07
GO:0097191	extrinsic apoptotic signaling pathway	2.32398e-07
GO:0010936	negative regulation of macrophage cytokine production	2.40077e-07
GO:0032224	positive regulation of synaptic transmission, cholinergic	2.40077e-07
GO:0046879	hormone secretion	2.40303e-07
GO:0009743	response to carbohydrate	2.4063e-07
GO:0032964	collagen biosynthetic process	2.54348e-07
GO:0050673	epithelial cell proliferation	2.65041e-07
GO:0032102	negative regulation of response to external stimulus	2.68131e-07
GO:0071375	cellular response to peptide hormone stimulus	2.83066e-07
GO:0006953	acute-phase response	2.83294e-07
GO:2000379	positive regulation of reactive oxygen species metabolic process	2.85179e-07
GO:0006816	calcium ion transport	2.89893e-07
GO:0035812	renal sodium excretion	3.13168e-07
GO:0035813	regulation of renal sodium excretion	3.13168e-07
GO:0009914	hormone transport	3.32302e-07
GO:0019233	sensory perception of pain	3.45259e-07
GO:0051897	positive regulation of protein kinase B signaling	3.6805e-07
GO:0060401	cytosolic calcium ion transport	3.6805e-07
GO:0014821	phasic smooth muscle contraction	3.86013e-07
GO:0014829	vascular smooth muscle contraction	3.86013e-07
GO:0051222	positive regulation of protein transport	3.9377e-07
GO:0045840	positive regulation of mitotic nuclear division	4.26186e-07
GO:0007187	G-protein coupled receptor signaling pathway, coupled to cyclic nucleotide second messenger	4.37954e-07
GO:0045216	cell-cell junction organization	4.37954e-07
GO:0061082	myeloid leukocyte cytokine production	4.70768e-07
GO:0010757	negative regulation of plasminogen activation	4.79155e-07
GO:0090257	regulation of muscle system process	4.96963e-07
GO:0006937	regulation of muscle contraction	5.15364e-07
GO:0044062	regulation of excretion	5.68638e-07
GO:0043491	protein kinase B signaling	6.75078e-07
GO:0002719	negative regulation of cytokine production involved in immune response	6.80882e-07
GO:0003071	renal system process involved in regulation of systemic arterial blood pressure	6.80882e-07
GO:0070838	divalent metal ion transport	7.46764e-07
GO:1901653	cellular response to peptide	7.96051e-07
GO:0072511	divalent inorganic cation transport	8.08173e-07
GO:1904951	positive regulation of establishment of protein localization	8.08173e-07
GO:1902041	regulation of extrinsic apoptotic signaling pathway via death domain receptors	8.08305e-07
GO:0003081	regulation of systemic arterial blood pressure by renin-angiotensin	8.08812e-07
GO:0014824	artery smooth muscle contraction	8.36777e-07
GO:0032222	regulation of synaptic transmission, cholinergic	8.36777e-07
GO:0051209	release of sequestered calcium ion into cytosol	9.14934e-07
GO:0051283	negative regulation of sequestering of calcium ion	9.14934e-07
GO:0031639	plasminogen activation	9.53791e-07
GO:0051282	regulation of sequestering of calcium ion	9.6408e-07
GO:0010595	positive regulation of endothelial cell migration	1.01537e-06
GO:1901654	response to ketone	1.03504e-06
GO:1903531	negative regulation of secretion by cell	1.03504e-06
GO:0030278	regulation of ossification	1.11329e-06
GO:0051208	sequestering of calcium ion	1.12465e-06
GO:0051785	positive regulation of nuclear division	1.12481e-06
GO:0034764	positive regulation of transmembrane transport	1.19645e-06
GO:0001503	ossification	1.20277e-06
GO:0009749	response to glucose	1.28475e-06
GO:0048265	response to pain	1.30061e-06
GO:0071634	regulation of transforming growth factor beta production	1.30061e-06
GO:0070474	positive regulation of uterine smooth muscle contraction	1.33606e-06
GO:0010810	regulation of cell-substrate adhesion	1.37845e-06
GO:0070661	leukocyte proliferation	1.41226e-06
GO:0002718	regulation of cytokine production involved in immune response	1.42066e-06
GO:0009746	response to hexose	1.47782e-06
GO:0071604	transforming growth factor beta production	1.50542e-06
GO:1902905	positive regulation of supramolecular fiber organization	1.58312e-06
GO:0045913	positive regulation of carbohydrate metabolic process	1.64974e-06
GO:1900078	positive regulation of cellular response to insulin stimulus	1.73325e-06
GO:0007188	adenylate cyclase-modulating G-protein coupled receptor signaling pathway	1.81265e-06
GO:0014820	tonic smooth muscle contraction	1.99991e-06
GO:0070472	regulation of uterine smooth muscle contraction	1.99991e-06
GO:0097553	calcium ion transmembrane import into cytosol	2.00123e-06
GO:0048762	mesenchymal cell differentiation	2.00253e-06
GO:0031644	regulation of neurological system process	2.04687e-06
GO:0045807	positive regulation of endocytosis	2.29061e-06
GO:0033135	regulation of peptidyl-serine phosphorylation	2.39432e-06
GO:0007160	cell-matrix adhesion	2.51119e-06
GO:0002701	negative regulation of production of molecular mediator of immune response	2.57118e-06
GO:0032885	regulation of polysaccharide biosynthetic process	2.57118e-06
GO:0033002	muscle cell proliferation	2.67491e-06
GO:0001819	positive regulation of cytokine production	2.79261e-06
GO:0050727	regulation of inflammatory response	2.79261e-06
GO:0070471	uterine smooth muscle contraction	2.85107e-06
GO:1902093	positive regulation of flagellated sperm motility	2.85107e-06
GO:0007435	salivary gland morphogenesis	2.90768e-06
GO:0051279	regulation of release of sequestered calcium ion into cytosol	3.06506e-06
GO:0043255	regulation of carbohydrate biosynthetic process	3.26774e-06
GO:0044706	multi-multicellular organism process	3.31998e-06
GO:0051896	regulation of protein kinase B signaling	3.31998e-06
GO:0071674	mononuclear cell migration	3.4808e-06
GO:0051251	positive regulation of lymphocyte activation	3.57594e-06
GO:0048660	regulation of smooth muscle cell proliferation	3.81038e-06
GO:0003093	regulation of glomerular filtration	3.91207e-06
GO:0043117	positive regulation of vascular permeability	3.91207e-06
GO:0032881	regulation of polysaccharide metabolic process	4.11395e-06
GO:0045823	positive regulation of heart contraction	4.11395e-06
GO:0048659	smooth muscle cell proliferation	4.29651e-06
GO:0023061	signal release	4.43423e-06
GO:0008625	extrinsic apoptotic signaling pathway via death domain receptors	4.44458e-06
GO:0000187	activation of MAPK activity	4.46933e-06
GO:0007431	salivary gland development	4.58795e-06
GO:0051281	positive regulation of release of sequestered calcium ion into cytosol	4.58795e-06
GO:0071675	regulation of mononuclear cell migration	4.58795e-06
GO:1905209	positive regulation of cardiocyte differentiation	4.58795e-06
GO:0030100	regulation of endocytosis	4.59342e-06
GO:0032496	response to lipopolysaccharide	4.7107e-06
GO:0051924	regulation of calcium ion transport	4.72701e-06
GO:0016485	protein processing	4.92674e-06
GO:0010755	regulation of plasminogen activation	5.20524e-06
GO:0010935	regulation of macrophage cytokine production	5.20524e-06
GO:0060456	positive regulation of digestive system process	5.20524e-06
GO:0110020	regulation of actomyosin structure organization	5.93085e-06
GO:2001236	regulation of extrinsic apoptotic signaling pathway	6.06597e-06
GO:0043270	positive regulation of ion transport	6.25063e-06
GO:0010955	negative regulation of protein processing	6.25348e-06
GO:1903318	negative regulation of protein maturation	6.25348e-06
GO:0051302	regulation of cell division	6.53e-06
GO:0032230	positive regulation of synaptic transmission, GABAergic	6.75273e-06
GO:0045760	positive regulation of action potential	6.75273e-06
GO:0030168	platelet activation	6.7726e-06
GO:0002237	response to molecule of bacterial origin	6.97846e-06
GO:0001666	response to hypoxia	7.12768e-06
GO:0030307	positive regulation of cell growth	7.27976e-06
GO:0043542	endothelial cell migration	7.9521e-06
GO:0022617	extracellular matrix disassembly	8.20011e-06
GO:0044060	regulation of endocrine process	8.3282e-06
GO:0036293	response to decreased oxygen levels	8.42184e-06
GO:0062013	positive regulation of small molecule metabolic process	8.98922e-06
GO:0070613	regulation of protein processing	9.30339e-06
GO:0010522	regulation of calcium ion transport into cytosol	9.56366e-06
GO:0022409	positive regulation of cell-cell adhesion	9.77221e-06
GO:0060485	mesenchyme development	9.77221e-06
GO:1903317	regulation of protein maturation	9.95844e-06
GO:0010959	regulation of metal ion transport	1.01102e-05
GO:0045927	positive regulation of growth	1.05383e-05
GO:0051883	killing of cells in other organism involved in symbiotic interaction	1.06983e-05
GO:1901317	regulation of flagellated sperm motility	1.06983e-05
GO:0045765	regulation of angiogenesis	1.0733e-05
GO:0071622	regulation of granulocyte chemotaxis	1.08714e-05
GO:0033138	positive regulation of peptidyl-serine phosphorylation	1.10984e-05
GO:2000377	regulation of reactive oxygen species metabolic process	1.13808e-05
GO:0006109	regulation of carbohydrate metabolic process	1.17609e-05
GO:0048260	positive regulation of receptor-mediated endocytosis	1.18339e-05
GO:0051496	positive regulation of stress fiber assembly	1.18339e-05
GO:2001237	negative regulation of extrinsic apoptotic signaling pathway	1.28192e-05
GO:0001977	renal system process involved in regulation of blood volume	1.31398e-05
GO:0070482	response to oxygen levels	1.35589e-05
GO:0035272	exocrine system development	1.39456e-05
GO:0055078	sodium ion homeostasis	1.39456e-05
GO:2000351	regulation of endothelial cell apoptotic process	1.39456e-05
GO:0002698	negative regulation of immune effector process	1.40774e-05
GO:0007218	neuropeptide signaling pathway	1.40774e-05
GO:0071621	granulocyte chemotaxis	1.40774e-05
GO:0031638	zymogen activation	1.50996e-05
GO:0072376	protein activation cascade	1.51874e-05
GO:0051817	modification of morphology or physiology of other organism involved in symbiotic interaction	1.54299e-05
GO:0009410	response to xenobiotic stimulus	1.5884e-05
GO:0051818	disruption of cells of other organism involved in symbiotic interaction	1.59223e-05
GO:0071636	positive regulation of transforming growth factor beta production	1.59223e-05
GO:0090201	negative regulation of release of cytochrome c from mitochondria	1.59223e-05
GO:0007631	feeding behavior	1.61431e-05
GO:0051928	positive regulation of calcium ion transport	1.61431e-05
GO:0010524	positive regulation of calcium ion transport into cytosol	1.63224e-05
GO:0022407	regulation of cell-cell adhesion	1.63709e-05
GO:0061138	morphogenesis of a branching epithelium	1.66633e-05
GO:0051604	protein maturation	1.69885e-05
GO:0048545	response to steroid hormone	1.73047e-05
GO:0048146	positive regulation of fibroblast proliferation	1.76165e-05
GO:0032675	regulation of interleukin-6 production	1.84378e-05
GO:1901342	regulation of vasculature development	1.89606e-05
GO:0050679	positive regulation of epithelial cell proliferation	2.05612e-05
GO:0045766	positive regulation of angiogenesis	2.11735e-05
GO:1900542	regulation of purine nucleotide metabolic process	2.18004e-05
GO:0002700	regulation of production of molecular mediator of immune response	2.18842e-05
GO:0002697	regulation of immune effector process	2.22781e-05
GO:0007597	blood coagulation, intrinsic pathway	2.2595e-05
GO:0007620	copulation	2.2595e-05
GO:1902074	response to salt	2.2595e-05
GO:0032233	positive regulation of actin filament bundle assembly	2.35583e-05
GO:0072577	endothelial cell apoptotic process	2.35583e-05
GO:0001763	morphogenesis of a branching structure	2.44597e-05
GO:1905207	regulation of cardiocyte differentiation	2.52485e-05
GO:0097530	granulocyte migration	2.58123e-05
GO:0003094	glomerular filtration	2.65271e-05
GO:0006140	regulation of nucleotide metabolic process	2.66208e-05
GO:0032869	cellular response to insulin stimulus	2.66208e-05
GO:0050670	regulation of lymphocyte proliferation	2.66208e-05
GO:0032635	interleukin-6 production	2.68749e-05
GO:0050709	negative regulation of protein secretion	2.68749e-05
GO:0050710	negative regulation of cytokine secretion	2.70259e-05
GO:0050918	positive chemotaxis	2.70259e-05
GO:0032944	regulation of mononuclear cell proliferation	2.73745e-05
GO:0042476	odontogenesis	3.02679e-05
GO:0097205	renal filtration	3.08839e-05
GO:0070588	calcium ion transmembrane transport	3.13791e-05
GO:0032963	collagen metabolic process	3.14698e-05
GO:0002792	negative regulation of peptide secretion	3.39846e-05
GO:0010594	regulation of endothelial cell migration	3.40433e-05
GO:0001701	in utero embryonic development	3.40689e-05
GO:0051235	maintenance of location	3.54834e-05
GO:0070663	regulation of leukocyte proliferation	3.58994e-05
GO:2001234	negative regulation of apoptotic signaling pathway	3.68574e-05
GO:1904018	positive regulation of vasculature development	3.88351e-05
GO:1904427	positive regulation of calcium ion transmembrane transport	3.96828e-05
GO:0032872	regulation of stress-activated MAPK cascade	3.98554e-05
GO:0051495	positive regulation of cytoskeleton organization	4.08972e-05
GO:0070302	regulation of stress-activated protein kinase signaling cascade	4.08972e-05
GO:0050671	positive regulation of lymphocyte proliferation	4.24743e-05
GO:0032946	positive regulation of mononuclear cell proliferation	4.40357e-05
GO:0048565	digestive tract development	4.40357e-05
GO:0007202	activation of phospholipase C activity	4.67069e-05
GO:0010460	positive regulation of heart rate	4.67069e-05
GO:0033555	multicellular organismal response to stress	4.74229e-05
GO:0002440	production of molecular mediator of immune response	4.76164e-05
GO:0006898	receptor-mediated endocytosis	4.86365e-05
GO:0032956	regulation of actin cytoskeleton organization	4.9576e-05
GO:0051249	regulation of lymphocyte activation	5.25389e-05
GO:0050927	positive regulation of positive chemotaxis	5.29657e-05
GO:0050804	modulation of chemical synaptic transmission	5.34844e-05
GO:0099177	regulation of trans-synaptic signaling	5.34844e-05
GO:0015850	organic hydroxy compound transport	5.3868e-05
GO:1902903	regulation of supramolecular fiber organization	5.45e-05
GO:0071560	cellular response to transforming growth factor beta stimulus	5.51938e-05
GO:1900076	regulation of cellular response to insulin stimulus	5.62124e-05
GO:0070665	positive regulation of leukocyte proliferation	5.62494e-05
GO:0050777	negative regulation of immune response	5.81883e-05
GO:0031667	response to nutrient levels	5.93551e-05
GO:0050926	regulation of positive chemotaxis	5.97499e-05
GO:0071559	response to transforming growth factor beta	6.07608e-05
GO:0051017	actin filament bundle assembly	6.43162e-05
GO:1903169	regulation of calcium ion transmembrane transport	6.43162e-05
GO:0043536	positive regulation of blood vessel endothelial cell migration	6.61354e-05
GO:0072347	response to anesthetic	6.61354e-05
GO:0055123	digestive system development	6.64657e-05
GO:1902692	regulation of neuroblast proliferation	6.70789e-05
GO:2000727	positive regulation of cardiac muscle cell differentiation	6.70789e-05
GO:0051702	interaction with symbiont	6.97098e-05
GO:0045931	positive regulation of mitotic cell cycle	7.32485e-05
GO:0061572	actin filament bundle organization	7.32485e-05
GO:0000271	polysaccharide biosynthetic process	7.3423e-05
GO:1904035	regulation of epithelial cell apoptotic process	7.3423e-05
GO:0002673	regulation of acute inflammatory response	7.56241e-05
GO:0030072	peptide hormone secretion	7.66621e-05
GO:2000177	regulation of neural precursor cell proliferation	7.72782e-05
GO:0035051	cardiocyte differentiation	7.80586e-05
GO:0032874	positive regulation of stress-activated MAPK cascade	8.05532e-05
GO:0048259	regulation of receptor-mediated endocytosis	8.12788e-05
GO:0051492	regulation of stress fiber assembly	8.12788e-05
GO:0070304	positive regulation of stress-activated protein kinase signaling cascade	8.31087e-05
GO:0010800	positive regulation of peptidyl-threonine phosphorylation	8.34493e-05
GO:0042554	superoxide anion generation	8.34493e-05
GO:0001999	renal response to blood flow involved in circulatory renin-angiotensin regulation of systemic arterial blood pressure	8.4625e-05
GO:0002001	renin secretion into blood stream	8.4625e-05
GO:0010193	response to ozone	8.4625e-05
GO:0061737	leukotriene signaling pathway	8.4625e-05
GO:1900736	regulation of phospholipase C-activating G-protein coupled receptor signaling pathway	8.4625e-05
GO:0060627	regulation of vesicle-mediated transport	8.5592e-05
GO:0035821	modification of morphology or physiology of other organism	8.57263e-05
GO:0048754	branching morphogenesis of an epithelial tube	8.57263e-05
GO:0001501	skeletal system development	8.93045e-05
GO:0009991	response to extracellular stimulus	9.18532e-05
GO:0032868	response to insulin	9.78227e-05
GO:0032612	interleukin-1 production	9.88012e-05
GO:0072593	reactive oxygen species metabolic process	0.000102126
GO:2000352	negative regulation of endothelial cell apoptotic process	0.00010223
GO:0050829	defense response to Gram-negative bacterium	0.000108522
GO:0007088	regulation of mitotic nuclear division	0.000109025
GO:0046651	lymphocyte proliferation	0.000111186
GO:0032970	regulation of actin filament-based process	0.000112064
GO:0001936	regulation of endothelial cell proliferation	0.000112248
GO:0014072	response to isoquinoline alkaloid	0.000112571
GO:0032228	regulation of synaptic transmission, GABAergic	0.000112571
GO:0043278	response to morphine	0.000112571
GO:0032943	mononuclear cell proliferation	0.00011595
GO:0048661	positive regulation of smooth muscle cell proliferation	0.000118919
GO:0001569	branching involved in blood vessel morphogenesis	0.000123571
GO:0010863	positive regulation of phospholipase C activity	0.000123571
GO:0010907	positive regulation of glucose metabolic process	0.000123571
GO:0043114	regulation of vascular permeability	0.000123571
GO:2001233	regulation of apoptotic signaling pathway	0.000123596
GO:0048145	regulation of fibroblast proliferation	0.00012438
GO:0002248	connective tissue replacement involved in inflammatory response wound healing	0.000126698
GO:0060754	positive regulation of mast cell chemotaxis	0.000126698
GO:0070944	neutrophil mediated killing of bacterium	0.000126698
GO:1902947	regulation of tau-protein kinase activity	0.000126698
GO:0051403	stress-activated MAPK cascade	0.000128572
GO:0051224	negative regulation of protein transport	0.000129477
GO:0048144	fibroblast proliferation	0.00013002
GO:0007015	actin filament organization	0.000133929
GO:0048246	macrophage chemotaxis	0.000135248
GO:0051482	positive regulation of cytosolic calcium ion concentration involved in phospholipase C-activating G-protein coupled signaling pathway	0.000135248
GO:0051930	regulation of sensory perception of pain	0.000135248
GO:0051931	regulation of sensory perception	0.000135248
GO:0072604	interleukin-6 secretion	0.000135248
GO:0007044	cell-substrate junction assembly	0.000135844
GO:0030038	contractile actin filament bundle assembly	0.000135844
GO:0043149	stress fiber assembly	0.000135844
GO:0032231	regulation of actin filament bundle assembly	0.000141854
GO:1904950	negative regulation of establishment of protein localization	0.000144665
GO:0007271	synaptic transmission, cholinergic	0.000147621
GO:1900274	regulation of phospholipase C activity	0.000147621
GO:1903523	negative regulation of blood circulation	0.000147621
GO:0043154	negative regulation of cysteine-type endopeptidase activity involved in apoptotic process	0.000148054
GO:0050707	regulation of cytokine secretion	0.000148666
GO:0060047	heart contraction	0.000151016
GO:0001558	regulation of cell growth	0.000154297
GO:0007589	body fluid secretion	0.000154449
GO:0003015	heart process	0.000160192
GO:0007618	mating	0.000160706
GO:0030212	hyaluronan metabolic process	0.000160706
GO:0001935	endothelial cell proliferation	0.000165528
GO:0048639	positive regulation of developmental growth	0.000174488
GO:0032715	negative regulation of interleukin-6 production	0.000174523
GO:0045777	positive regulation of blood pressure	0.000174523
GO:0002246	wound healing involved in inflammatory response	0.000177042
GO:0014827	intestine smooth muscle contraction	0.000177042
GO:0014832	urinary bladder smooth muscle contraction	0.000177042
GO:0014848	urinary tract smooth muscle contraction	0.000177042
GO:0060073	micturition	0.000177042
GO:0060753	regulation of mast cell chemotaxis	0.000177042
GO:0070943	neutrophil mediated killing of symbiont cell	0.000177042
GO:1900125	regulation of hyaluronan biosynthetic process	0.000177042
GO:1902042	negative regulation of extrinsic apoptotic signaling pathway via death domain receptors	0.000189089
GO:0002027	regulation of heart rate	0.000189456
GO:0018105	peptidyl-serine phosphorylation	0.000194017
GO:0051783	regulation of nuclear division	0.000203607
GO:1904019	epithelial cell apoptotic process	0.000204943
GO:0010613	positive regulation of cardiac muscle hypertrophy	0.000220538
GO:0014742	positive regulation of muscle hypertrophy	0.000220538
GO:0044058	regulation of digestive system process	0.000220538
GO:0097028	dendritic cell differentiation	0.000220538
GO:1905517	macrophage migration	0.000220538
GO:0031098	stress-activated protein kinase signaling cascade	0.00022495
GO:0031032	actomyosin structure organization	0.000224987
GO:0046854	phosphatidylinositol phosphorylation	0.000229859
GO:0090100	positive regulation of transmembrane receptor protein serine/threonine kinase signaling pathway	0.000229859
GO:1900180	regulation of protein localization to nucleus	0.000229859
GO:0006006	glucose metabolic process	0.000230589
GO:0035754	B cell chemotaxis	0.000235611
GO:0042045	epithelial fluid transport	0.000235611
GO:0046877	regulation of saliva secretion	0.000235611
GO:0051045	negative regulation of membrane protein ectodomain proteolysis	0.000235611
GO:0090037	positive regulation of protein kinase C signaling	0.000235611
GO:0010799	regulation of peptidyl-threonine phosphorylation	0.000237455
GO:1904036	negative regulation of epithelial cell apoptotic process	0.000237455
GO:0002683	negative regulation of immune system process	0.000237691
GO:0048568	embryonic organ development	0.000244571
GO:0030799	regulation of cyclic nucleotide metabolic process	0.000247636
GO:0048732	gland development	0.00025161
GO:0001952	regulation of cell-matrix adhesion	0.000266381
GO:0050663	cytokine secretion	0.000272844
GO:0046326	positive regulation of glucose import	0.000273761
GO:0071548	response to dexamethasone	0.000273761
GO:2000725	regulation of cardiac muscle cell differentiation	0.000273761
GO:0010811	positive regulation of cell-substrate adhesion	0.000276127
GO:0019730	antimicrobial humoral response	0.000286126
GO:0043279	response to alkaloid	0.000286126
GO:1904659	glucose transmembrane transport	0.000286126
GO:0032368	regulation of lipid transport	0.000296383
GO:0051715	cytolysis in other organism	0.000302357
GO:0060363	cranial suture morphogenesis	0.000302357
GO:0070942	neutrophil mediated cytotoxicity	0.000302357
GO:0090594	inflammatory response to wounding	0.000302357
GO:1990314	cellular response to insulin-like growth factor stimulus	0.000302357
GO:2000270	negative regulation of fibroblast apoptotic process	0.000302357
GO:0032757	positive regulation of interleukin-8 production	0.000313473
GO:0044764	multi-organism cellular process	0.000313473
GO:0090199	regulation of release of cytochrome c from mitochondria	0.000313473
GO:0005976	polysaccharide metabolic process	0.000317685
GO:2000117	negative regulation of cysteine-type endopeptidase activity	0.000317685
GO:0060562	epithelial tube morphogenesis	0.000319483
GO:0000060	protein import into nucleus, translocation	0.000334647
GO:0032613	interleukin-10 production	0.000334647
GO:0051932	synaptic transmission, GABAergic	0.000334647
GO:0061098	positive regulation of protein tyrosine kinase activity	0.000334647
GO:2000179	positive regulation of neural precursor cell proliferation	0.000334647
GO:0008645	hexose transmembrane transport	0.000351667
GO:0032680	regulation of tumor necrosis factor production	0.000351667
GO:0046834	lipid phosphorylation	0.000351667
GO:0018209	peptidyl-serine modification	0.000353202
GO:0043583	ear development	0.000358684
GO:0048638	regulation of developmental growth	0.000359084
GO:0009612	response to mechanical stimulus	0.000366663
GO:0015749	monosaccharide transmembrane transport	0.00037572
GO:0008343	adult feeding behavior	0.000377234
GO:0045217	cell-cell junction maintenance	0.000377234
GO:0010718	positive regulation of epithelial to mesenchymal transition	0.000379715
GO:0010828	positive regulation of glucose transmembrane transport	0.000379715
GO:0010862	positive regulation of pathway-restricted SMAD protein phosphorylation	0.000379715
GO:0032640	tumor necrosis factor production	0.000388178
GO:0050870	positive regulation of T cell activation	0.000399931
GO:1903555	regulation of tumor necrosis factor superfamily cytokine production	0.000400929
GO:0010518	positive regulation of phospholipase activity	0.000403641
GO:0046579	positive regulation of Ras protein signal transduction	0.000403641
GO:0022612	gland morphogenesis	0.000413976
GO:0034219	carbohydrate transmembrane transport	0.000413976
GO:0043281	regulation of cysteine-type endopeptidase activity involved in apoptotic process	0.000426344
GO:0010823	negative regulation of mitochondrion organization	0.000428515
GO:0042306	regulation of protein import into nucleus	0.000428515
GO:0048871	multicellular organismal homeostasis	0.000435842
GO:0043467	regulation of generation of precursor metabolites and energy	0.000440978
GO:0051592	response to calcium ion	0.000440978
GO:0055007	cardiac muscle cell differentiation	0.000440978
GO:0033500	carbohydrate homeostasis	0.000444671
GO:0042593	glucose homeostasis	0.000444671
GO:0042482	positive regulation of odontogenesis	0.000460194
GO:0048484	enteric nervous system development	0.000460194
GO:0051873	killing by host of symbiont cells	0.000460194
GO:0051056	regulation of small GTPase mediated signal transduction	0.000464095
GO:0060359	response to ammonium ion	0.000469215
GO:0071706	tumor necrosis factor superfamily cytokine production	0.000469215
GO:0016049	cell growth	0.000470305
GO:0016051	carbohydrate biosynthetic process	0.000473271
GO:0046488	phosphatidylinositol metabolic process	0.000473271
GO:0048738	cardiac muscle tissue development	0.000473271
GO:0010676	positive regulation of cellular carbohydrate metabolic process	0.000481172
GO:0008286	insulin receptor signaling pathway	0.000483806
GO:0045834	positive regulation of lipid metabolic process	0.000483806
GO:1904064	positive regulation of cation transmembrane transport	0.000483806
GO:0019932	second-messenger-mediated signaling	0.00048621
GO:0006869	lipid transport	0.000493761
GO:0032355	response to estradiol	0.000498718
GO:1903039	positive regulation of leukocyte cell-cell adhesion	0.000503237
GO:0043550	regulation of lipid kinase activity	0.000508985
GO:0098900	regulation of action potential	0.000508985
GO:0007405	neuroblast proliferation	0.000537809
GO:1904589	regulation of protein import	0.000537809
GO:0002551	mast cell chemotaxis	0.000551192
GO:0010459	negative regulation of heart rate	0.000551192
GO:0010759	positive regulation of macrophage chemotaxis	0.000551192
GO:0010763	positive regulation of fibroblast migration	0.000551192
GO:0014831	gastro-intestinal system smooth muscle contraction	0.000551192
GO:0019934	cGMP-mediated signaling	0.000551192
GO:0034331	cell junction maintenance	0.000551192
GO:0034392	negative regulation of smooth muscle cell apoptotic process	0.000551192
GO:0048266	behavioral response to pain	0.000551192
GO:0070493	thrombin-activated receptor signaling pathway	0.000551192
GO:2000047	regulation of cell-cell adhesion mediated by cadherin	0.000551192
GO:0019318	hexose metabolic process	0.00056744
GO:0031330	negative regulation of cellular catabolic process	0.00056744
GO:0043388	positive regulation of DNA binding	0.000567658
GO:0060688	regulation of morphogenesis of a branching structure	0.000567658
GO:0046824	positive regulation of nucleocytoplasmic transport	0.000598547
GO:0051057	positive regulation of small GTPase mediated signal transduction	0.000598547
GO:0031214	biomineral tissue development	0.000630052
GO:0001836	release of cytochrome c from mitochondria	0.00063049
GO:0031640	killing of cells of other organism	0.00063049
GO:0044364	disruption of cells of other organism	0.00063049
GO:0001976	neurological system process involved in regulation of systemic arterial blood pressure	0.000650181
GO:0007320	insemination	0.000650181
GO:0030213	hyaluronan biosynthetic process	0.000650181
GO:0035810	positive regulation of urine volume	0.000650181
GO:0043568	positive regulation of insulin-like growth factor receptor signaling pathway	0.000650181
GO:0046541	saliva secretion	0.000650181
GO:0051852	disruption by host of symbiont cells	0.000650181
GO:0060391	positive regulation of SMAD protein signal transduction	0.000650181
GO:0061051	positive regulation of cell growth involved in cardiac muscle cell development	0.000650181
GO:0097531	mast cell migration	0.000650181
GO:1905049	negative regulation of metallopeptidase activity	0.000650181
GO:1905523	positive regulation of macrophage migration	0.000650181
GO:0010517	regulation of phospholipase activity	0.000663504
GO:0055025	positive regulation of cardiac muscle tissue development	0.000663504
GO:0061351	neural precursor cell proliferation	0.000666377
GO:0001837	epithelial to mesenchymal transition	0.000685085
GO:0031056	regulation of histone modification	0.000685085
GO:0034767	positive regulation of ion transmembrane transport	0.000685085
GO:0007611	learning or memory	0.000687905
GO:0019216	regulation of lipid metabolic process	0.000694255
GO:0042692	muscle cell differentiation	0.000694255
GO:0018149	peptide cross-linking	0.000697601
GO:0030879	mammary gland development	0.000723616
GO:1905952	regulation of lipid localization	0.000723616
GO:0008016	regulation of heart contraction	0.000727527
GO:0010812	negative regulation of cell-substrate adhesion	0.000732796
GO:0046578	regulation of Ras protein signal transduction	0.000741106
GO:0032930	positive regulation of superoxide anion generation	0.000757115
GO:0050930	induction of positive chemotaxis	0.000757115
GO:0060393	regulation of pathway-restricted SMAD protein phosphorylation	0.000769103
GO:0001906	cell killing	0.000784255
GO:0008277	regulation of G-protein coupled receptor protein signaling pathway	0.000784255
GO:0060193	positive regulation of lipase activity	0.000806537
GO:0072091	regulation of stem cell proliferation	0.000806537
GO:0010876	lipid localization	0.000810081
GO:0045787	positive regulation of cell cycle	0.000810081
GO:2000027	regulation of organ morphogenesis	0.000811874
GO:2000116	regulation of cysteine-type endopeptidase activity	0.000811874
GO:0051384	response to glucocorticoid	0.000826624
GO:0032677	regulation of interleukin-8 production	0.00084511
GO:0046888	negative regulation of hormone secretion	0.00084511
GO:0034616	response to laminar fluid shear stress	0.000871948
GO:0045725	positive regulation of glycogen biosynthetic process	0.000871948
GO:0046628	positive regulation of insulin receptor signaling pathway	0.000871948
GO:0090036	regulation of protein kinase C signaling	0.000871948
GO:2000484	positive regulation of interleukin-8 secretion	0.000871948
GO:0060389	pathway-restricted SMAD protein phosphorylation	0.000884837
GO:0110053	regulation of actin filament organization	0.00088758
GO:0050806	positive regulation of synaptic transmission	0.000893177
GO:0007162	negative regulation of cell adhesion	0.000903332
GO:0008643	carbohydrate transport	0.000916176
GO:0009187	cyclic nucleotide metabolic process	0.000916176
GO:0033619	membrane protein proteolysis	0.000925732
GO:1900182	positive regulation of protein localization to nucleus	0.000925732
GO:1904888	cranial skeletal system development	0.000925732
GO:0042129	regulation of T cell proliferation	0.000963425
GO:0043535	regulation of blood vessel endothelial cell migration	0.000963425
GO:0006801	superoxide metabolic process	0.000967807
GO:0010611	regulation of cardiac muscle hypertrophy	0.000967807
GO:0046324	regulation of glucose import	0.000967807
GO:0050795	regulation of behavior	0.000967807
GO:0051145	smooth muscle cell differentiation	0.000967807
GO:0060395	SMAD protein signal transduction	0.000967807
GO:0070875	positive regulation of glycogen metabolic process	0.000994635
GO:0032611	interleukin-1 beta production	0.00101108
GO:0040014	regulation of multicellular organism growth	0.00101108
GO:0014743	regulation of muscle hypertrophy	0.00105555
GO:1900371	regulation of purine nucleotide biosynthetic process	0.00106303
GO:0030808	regulation of nucleotide biosynthetic process	0.00108902
GO:0051155	positive regulation of striated muscle cell differentiation	0.00110125
GO:0031065	positive regulation of histone deacetylation	0.00112513
GO:0060390	regulation of SMAD protein signal transduction	0.00112513
GO:1902043	positive regulation of extrinsic apoptotic signaling pathway via death domain receptors	0.00112513
GO:2000269	regulation of fibroblast apoptotic process	0.00112513
GO:2001275	positive regulation of glucose import in response to insulin stimulus	0.00112513
GO:0048863	stem cell differentiation	0.00112766
GO:0140014	mitotic nuclear division	0.00114648
GO:0014032	neural crest cell development	0.00114818
GO:0032637	interleukin-8 production	0.00114818
GO:0009895	negative regulation of catabolic process	0.00116553
GO:0051851	modification by host of symbiont morphology or physiology	0.00119635
GO:0050680	negative regulation of epithelial cell proliferation	0.00119746
GO:0055067	monovalent inorganic cation homeostasis	0.00119746
GO:0090287	regulation of cellular response to growth factor stimulus	0.00120434
GO:0005996	monosaccharide metabolic process	0.00122411
GO:0032652	regulation of interleukin-1 production	0.00124579
GO:0019935	cyclic-nucleotide-mediated signaling	0.00125442
GO:0031960	response to corticosteroid	0.00125442
GO:0001991	regulation of systemic arterial blood pressure by circulatory renin-angiotensin	0.00126339
GO:0032928	regulation of superoxide anion generation	0.00126339
GO:0036303	lymph vessel morphogenesis	0.00126339
GO:0045821	positive regulation of glycolytic process	0.00126339
GO:0070633	transepithelial transport	0.00126339
GO:0097094	craniofacial suture morphogenesis	0.00126339
GO:0097709	connective tissue replacement	0.00126339
GO:0007045	cell-substrate adherens junction assembly	0.00129649
GO:0048041	focal adhesion assembly	0.00129649
GO:0050890	cognition	0.00130557
GO:0090068	positive regulation of cell cycle process	0.00130557
GO:1902275	regulation of chromatin organization	0.00134339
GO:0051090	regulation of DNA binding transcription factor activity	0.00134534
GO:0002702	positive regulation of production of molecular mediator of immune response	0.00134848
GO:0010507	negative regulation of autophagy	0.00134848
GO:0014031	mesenchymal cell development	0.00134848
GO:0014910	regulation of smooth muscle cell migration	0.00134848
GO:0048864	stem cell development	0.00134848
GO:0050764	regulation of phagocytosis	0.00134848
GO:1903725	regulation of phospholipid metabolic process	0.00134848
GO:1901214	regulation of neuron death	0.00139097
GO:0033158	regulation of protein import into nucleus, translocation	0.00140936
GO:0042533	tumor necrosis factor biosynthetic process	0.00140936
GO:0042534	regulation of tumor necrosis factor biosynthetic process	0.00140936
GO:0051197	positive regulation of coenzyme metabolic process	0.00140936
GO:0060749	mammary gland alveolus development	0.00140936
GO:0061050	regulation of cell growth involved in cardiac muscle cell development	0.00140936
GO:0061377	mammary gland lobule development	0.00140936
GO:0090190	positive regulation of branching involved in ureteric bud morphogenesis	0.00140936
GO:0055013	cardiac muscle cell development	0.00145635
GO:0070167	regulation of biomineral tissue development	0.00145635
GO:0051147	regulation of muscle cell differentiation	0.00146876
GO:0031100	animal organ regeneration	0.00151226
GO:0051952	regulation of amine transport	0.00151226
GO:0061097	regulation of protein tyrosine kinase activity	0.00151226
GO:0071356	cellular response to tumor necrosis factor	0.00152675
GO:0016525	negative regulation of angiogenesis	0.00153441
GO:0043534	blood vessel endothelial cell migration	0.00153441
GO:0048771	tissue remodeling	0.00153441
GO:0002052	positive regulation of neuroblast proliferation	0.00156301
GO:0035809	regulation of urine volume	0.00156301
GO:0044346	fibroblast apoptotic process	0.00156301
GO:0051099	positive regulation of binding	0.001568
GO:0010827	regulation of glucose transmembrane transport	0.0015695
GO:0014033	neural crest cell differentiation	0.0015695
GO:0009152	purine ribonucleotide biosynthetic process	0.00162255
GO:0030317	flagellated sperm motility	0.00162808
GO:0046323	glucose import	0.00162808
GO:0035265	organ growth	0.00163669
GO:0043112	receptor metabolic process	0.00163669
GO:2000181	negative regulation of blood vessel morphogenesis	0.00163669
GO:0042742	defense response to bacterium	0.00167207
GO:0042098	T cell proliferation	0.00170746
GO:0071222	cellular response to lipopolysaccharide	0.00170746
GO:0006164	purine nucleotide biosynthetic process	0.0017227
GO:0010804	negative regulation of tumor necrosis factor-mediated signaling pathway	0.00172429
GO:0030813	positive regulation of nucleotide catabolic process	0.00172429
GO:0044321	response to leptin	0.00172429
GO:0071677	positive regulation of mononuclear cell migration	0.00172429
GO:0090312	positive regulation of protein deacetylation	0.00172429
GO:0014909	smooth muscle cell migration	0.00181199
GO:0055006	cardiac cell development	0.00181199
GO:0097722	sperm motility	0.00181199
GO:0031058	positive regulation of histone modification	0.00187606
GO:0034333	adherens junction assembly	0.00187606
GO:0045844	positive regulation of striated muscle tissue development	0.00187606
GO:0048636	positive regulation of muscle organ development	0.00187606
GO:0010758	regulation of macrophage chemotaxis	0.00189315
GO:0051194	positive regulation of cofactor metabolic process	0.00189315
GO:0061213	positive regulation of mesonephros development	0.00189315
GO:2001026	regulation of endothelial cell chemotaxis	0.00189315
GO:2001273	regulation of glucose import in response to insulin stimulus	0.00189315
GO:1901343	negative regulation of vasculature development	0.00189365
GO:1903037	regulation of leukocyte cell-cell adhesion	0.00190883
GO:1904062	regulation of cation transmembrane transport	0.00190883
GO:0034765	regulation of ion transmembrane transport	0.00191532
GO:0015837	amine transport	0.00194152
GO:0060191	regulation of lipase activity	0.00194152
GO:1901863	positive regulation of muscle tissue development	0.00194152
GO:0009260	ribonucleotide biosynthetic process	0.00196462
GO:0034612	response to tumor necrosis factor	0.00199296
GO:0007179	transforming growth factor beta receptor signaling pathway	0.00201189
GO:0048839	inner ear development	0.00201189
GO:0071219	cellular response to molecule of bacterial origin	0.00201189
GO:0072522	purine-containing compound biosynthetic process	0.00205053
GO:0051043	regulation of membrane protein ectodomain proteolysis	0.00206955
GO:0090189	regulation of branching involved in ureteric bud morphogenesis	0.00206955
GO:1902895	positive regulation of pri-miRNA transcription by RNA polymerase II	0.00206955
GO:2000191	regulation of fatty acid transport	0.00206955
GO:2000679	positive regulation of transcription regulatory region DNA binding	0.00206955
GO:0046390	ribose phosphate biosynthetic process	0.00207978
GO:0010717	regulation of epithelial to mesenchymal transition	0.00214642
GO:0031099	regeneration	0.00217736
GO:0030593	neutrophil chemotaxis	0.00221758
GO:0007565	female pregnancy	0.00222016
GO:0031348	negative regulation of defense response	0.00222016
GO:0060348	bone development	0.00222016
GO:0001945	lymph vessel development	0.00225344
GO:0002092	positive regulation of receptor internalization	0.00225344
GO:0044381	glucose import in response to insulin stimulus	0.00225344
GO:0060259	regulation of feeding behavior	0.00225344
GO:2000482	regulation of interleukin-8 secretion	0.00225344
GO:2000778	positive regulation of interleukin-6 secretion	0.00225344
GO:0042110	T cell activation	0.00231085
GO:0070997	neuron death	0.00232483
GO:0001909	leukocyte mediated cytotoxicity	0.00236428
GO:0033273	response to vitamin	0.00236428
GO:1905269	positive regulation of chromatin organization	0.00236428
GO:0055024	regulation of cardiac muscle tissue development	0.00243984
GO:0097327	response to antineoplastic agent	0.00243984
GO:2001023	regulation of response to drug	0.00243984
GO:0006465	signal peptide processing	0.00244479
GO:0071514	genetic imprinting	0.00244479
GO:1905048	regulation of metallopeptidase activity	0.00244479
GO:0050863	regulation of T cell activation	0.00248831
GO:0006644	phospholipid metabolic process	0.00249056
GO:0090277	positive regulation of peptide hormone secretion	0.00251687
GO:0043523	regulation of neuron apoptotic process	0.00253614
GO:0015893	drug transport	0.00258367
GO:0014812	muscle cell migration	0.0025954
GO:0005979	regulation of glycogen biosynthetic process	0.00264354
GO:0010962	regulation of glucan biosynthetic process	0.00264354
GO:0031063	regulation of histone deacetylation	0.00264354
GO:0032692	negative regulation of interleukin-1 production	0.00264354
GO:0035025	positive regulation of Rho protein signal transduction	0.00264354
GO:0042044	fluid transport	0.00264354
GO:0042104	positive regulation of activated T cell proliferation	0.00264354
GO:0042481	regulation of odontogenesis	0.00264354
GO:0043567	regulation of insulin-like growth factor receptor signaling pathway	0.00264354
GO:0061217	regulation of mesonephros development	0.00264354
GO:1905521	regulation of macrophage migration	0.00264354
GO:2001171	positive regulation of ATP biosynthetic process	0.00264354
GO:0046677	response to antibiotic	0.00266002
GO:0022600	digestive system process	0.00267543
GO:0055017	cardiac muscle tissue growth	0.00267543
GO:0017038	protein import	0.00272994
GO:0010906	regulation of glucose metabolic process	0.00275697
GO:0043502	regulation of muscle adaptation	0.00275697
GO:0006959	humoral immune response	0.0027671
GO:0006909	phagocytosis	0.00280348
GO:0042102	positive regulation of T cell proliferation	0.00284003
GO:0006929	substrate-dependent cell migration	0.00284966
GO:0031954	positive regulation of protein autophosphorylation	0.00284966
GO:0045822	negative regulation of heart contraction	0.00284966
GO:0051450	myoblast proliferation	0.00284966
GO:0048010	vascular endothelial growth factor receptor signaling pathway	0.00292462
GO:0090276	regulation of peptide hormone secretion	0.00298622
GO:0007159	leukocyte cell-cell adhesion	0.00299061
GO:0003300	cardiac muscle hypertrophy	0.00301076
GO:0015696	ammonium transport	0.00301076
GO:0071216	cellular response to biotic stimulus	0.00303938
GO:0030823	regulation of cGMP metabolic process	0.0030631
GO:0072606	interleukin-8 secretion	0.0030631
GO:1990266	neutrophil migration	0.00309844
GO:0051271	negative regulation of cellular component movement	0.00318665
GO:0002705	positive regulation of leukocyte mediated immunity	0.00318768
GO:0014897	striated muscle hypertrophy	0.00318768
GO:0030282	bone mineralization	0.00318768
GO:0001938	positive regulation of endothelial cell proliferation	0.00327849
GO:0046822	regulation of nucleocytoplasmic transport	0.00327849
GO:0060419	heart growth	0.00327849
GO:0007194	negative regulation of adenylate cyclase activity	0.00328381
GO:0007205	protein kinase C-activating G-protein coupled receptor signaling pathway	0.00328381
GO:0035767	endothelial cell chemotaxis	0.00328381
GO:0070528	protein kinase C signaling	0.00328381
GO:0014896	muscle hypertrophy	0.00337087
GO:0032609	interferon-gamma production	0.00337087
GO:0051149	positive regulation of muscle cell differentiation	0.00337087
GO:0045444	fat cell differentiation	0.00337204
GO:0048588	developmental cell growth	0.0034298
GO:0051701	interaction with host	0.0034298
GO:0030818	negative regulation of cAMP biosynthetic process	0.00351176
GO:0032689	negative regulation of interferon-gamma production	0.00351176
GO:0032733	positive regulation of interleukin-10 production	0.00351176
GO:0034390	smooth muscle cell apoptotic process	0.00351176
GO:0034391	regulation of smooth muscle cell apoptotic process	0.00351176
GO:0045745	positive regulation of G-protein coupled receptor protein signaling pathway	0.00351176
GO:0060325	face morphogenesis	0.00351176
GO:0070873	regulation of glycogen metabolic process	0.00351176
GO:0090023	positive regulation of neutrophil chemotaxis	0.00351176
GO:0031346	positive regulation of cell projection organization	0.00373972
GO:0040013	negative regulation of locomotion	0.00373972
GO:0003298	physiological muscle hypertrophy	0.0037469
GO:0003301	physiological cardiac muscle hypertrophy	0.0037469
GO:0031280	negative regulation of cyclase activity	0.0037469
GO:0042307	positive regulation of protein import into nucleus	0.0037469
GO:0061049	cell growth involved in cardiac muscle cell development	0.0037469
GO:0030449	regulation of complement activation	0.00385672
GO:0051402	neuron apoptotic process	0.00391637
GO:2000257	regulation of protein activation cascade	0.00395874
GO:0051054	positive regulation of DNA metabolic process	0.00398031
GO:0002714	positive regulation of B cell mediated immunity	0.00398919
GO:0002891	positive regulation of immunoglobulin mediated immune response	0.00398919
GO:0010762	regulation of fibroblast migration	0.00398919
GO:0030803	negative regulation of cyclic nucleotide biosynthetic process	0.00398919
GO:0030947	regulation of vascular endothelial growth factor receptor signaling pathway	0.00398919
GO:0042755	eating behavior	0.00398919
GO:0071624	positive regulation of granulocyte chemotaxis	0.00398919
GO:0090322	regulation of superoxide metabolic process	0.00398919
GO:1902893	regulation of pri-miRNA transcription by RNA polymerase II	0.00398919
GO:1903580	positive regulation of ATP metabolic process	0.00398919
GO:0006650	glycerophospholipid metabolic process	0.00416104
GO:0007613	memory	0.00416768
GO:0017015	regulation of transforming growth factor beta receptor signaling pathway	0.00416768
GO:0051153	regulation of striated muscle cell differentiation	0.00416768
GO:0034329	cell junction assembly	0.00417638
GO:0051350	negative regulation of lyase activity	0.00423859
GO:0090218	positive regulation of lipid kinase activity	0.00423859
GO:1902624	positive regulation of neutrophil migration	0.00423859
GO:1905332	positive regulation of morphogenesis of an epithelium	0.00423859
GO:0043500	muscle adaptation	0.00427463
GO:0072089	stem cell proliferation	0.00427463
GO:0090092	regulation of transmembrane receptor protein serine/threonine kinase signaling pathway	0.00431066
GO:1903844	regulation of cellular response to transforming growth factor beta stimulus	0.00438323
GO:0042552	myelination	0.0044935
GO:0007616	long-term memory	0.00449504
GO:0030815	negative regulation of cAMP metabolic process	0.00449504
GO:0032148	activation of protein kinase B activity	0.00449504
GO:0090279	regulation of calcium ion import	0.00449504
GO:1904591	positive regulation of protein import	0.00449504
GO:0009165	nucleotide biosynthetic process	0.0045115
GO:1903510	mucopolysaccharide metabolic process	0.00460544
GO:0007272	ensheathment of neurons	0.00471906
GO:0008366	axon ensheathment	0.00471906
GO:1901293	nucleoside phosphate biosynthetic process	0.00472099
GO:0030501	positive regulation of bone mineralization	0.00475852
GO:0032369	negative regulation of lipid transport	0.00475852
GO:0044331	cell-cell adhesion mediated by cadherin	0.00475852
GO:0048566	embryonic digestive tract development	0.00475852
GO:0085029	extracellular matrix assembly	0.00475852
GO:0090022	regulation of neutrophil chemotaxis	0.00475852
GO:2000648	positive regulation of stem cell proliferation	0.00475852
GO:0051101	regulation of DNA binding	0.00483437
GO:0002720	positive regulation of cytokine production involved in immune response	0.00502898
GO:0003179	heart valve morphogenesis	0.00502898
GO:0030800	negative regulation of cyclic nucleotide metabolic process	0.00502898
GO:0032008	positive regulation of TOR signaling	0.00502898
GO:0060323	head morphogenesis	0.00502898
GO:0014706	striated muscle tissue development	0.00504813
GO:0009266	response to temperature stimulus	0.0051782
GO:0018107	peptidyl-threonine phosphorylation	0.0051905
GO:0001912	positive regulation of leukocyte mediated cytotoxicity	0.00530638
GO:0001953	negative regulation of cell-matrix adhesion	0.00530638
GO:0034405	response to fluid shear stress	0.00530638
GO:0010675	regulation of cellular carbohydrate metabolic process	0.00531263
GO:0061448	connective tissue development	0.00541209
GO:0006275	regulation of DNA replication	0.00543649
GO:0045598	regulation of fat cell differentiation	0.00543649
GO:0071333	cellular response to glucose stimulus	0.00556207
GO:0002090	regulation of receptor internalization	0.00559068
GO:0002639	positive regulation of immunoglobulin production	0.00559068
GO:0042417	dopamine metabolic process	0.00559068
GO:0061614	pri-miRNA transcription by RNA polymerase II	0.00559068
GO:0090311	regulation of protein deacetylation	0.00559068
GO:1902622	regulation of neutrophil migration	0.00559068
GO:0062014	negative regulation of small molecule metabolic process	0.00568939
GO:0051091	positive regulation of DNA binding transcription factor activity	0.0058175
GO:0046330	positive regulation of JNK cascade	0.00581846
GO:0071331	cellular response to hexose stimulus	0.00581846
GO:0008156	negative regulation of DNA replication	0.00588182
GO:0014003	oligodendrocyte development	0.00588182
GO:0032941	secretion by tissue	0.00588182
GO:0038128	ERBB2 signaling pathway	0.00588182
GO:0043954	cellular component maintenance	0.00588182
GO:0045773	positive regulation of axon extension	0.00588182
GO:0046006	regulation of activated T cell proliferation	0.00588182
GO:0048009	insulin-like growth factor receptor signaling pathway	0.00588182
GO:0048016	inositol phosphate-mediated signaling	0.00588182
GO:0030099	myeloid cell differentiation	0.00593622
GO:0002920	regulation of humoral immune response	0.00594927
GO:0008637	apoptotic mitochondrial changes	0.00594927
GO:0071326	cellular response to monosaccharide stimulus	0.00594927
GO:0060537	muscle tissue development	0.00606245
GO:0001659	temperature homeostasis	0.00617979
GO:0003170	heart valve development	0.00617979
GO:0033628	regulation of cell adhesion mediated by integrin	0.00617979
GO:0045761	regulation of adenylate cyclase activity	0.00617979
GO:0050832	defense response to fungus	0.00617979
GO:0070169	positive regulation of biomineral tissue development	0.00617979
GO:0090184	positive regulation of kidney development	0.00617979
GO:1900744	regulation of p38MAPK cascade	0.00617979
GO:0007050	cell cycle arrest	0.00624275
GO:0034504	protein localization to nucleus	0.00624275
GO:0051052	regulation of DNA metabolic process	0.00625535
GO:1903587	regulation of blood vessel endothelial cell proliferation involved in sprouting angiogenesis	0.00648452
GO:0034332	adherens junction organization	0.00649014
GO:1903670	regulation of sprouting angiogenesis	0.00649014
GO:0050728	negative regulation of inflammatory response	0.00662979
GO:0021700	developmental maturation	0.00677984
GO:0006509	membrane protein ectodomain proteolysis	0.00679599
GO:0010761	fibroblast migration	0.00679599
GO:0031952	regulation of protein autophosphorylation	0.00679599
GO:0033574	response to testosterone	0.00679599
GO:0045429	positive regulation of nitric oxide biosynthetic process	0.00679599
GO:0051602	response to electrical stimulus	0.00679599
GO:1904407	positive regulation of nitric oxide metabolic process	0.00679599
GO:0007173	epidermal growth factor receptor signaling pathway	0.00691446
GO:0009582	detection of abiotic stimulus	0.00691446
GO:0035023	regulation of Rho protein signal transduction	0.00705948
GO:0071322	cellular response to carbohydrate stimulus	0.00705948
GO:0000280	nuclear division	0.00707045
GO:0019835	cytolysis	0.00711415
GO:0022602	ovulation cycle process	0.00711415
GO:0043277	apoptotic cell clearance	0.00711415
GO:0048483	autonomic nervous system development	0.00711415
GO:0050798	activated T cell proliferation	0.00711415
GO:1903727	positive regulation of phospholipid metabolic process	0.00711415
GO:0042063	gliogenesis	0.00715445
GO:0007586	digestion	0.00720631
GO:0001678	cellular glucose homeostasis	0.00735494
GO:0032653	regulation of interleukin-10 production	0.00743895
GO:0045776	negative regulation of blood pressure	0.00743895
GO:0007612	learning	0.00750539
GO:0046394	carboxylic acid biosynthetic process	0.00765363
GO:0001889	liver development	0.00765766
GO:0016053	organic acid biosynthetic process	0.00772883
GO:0043551	regulation of phosphatidylinositol 3-kinase activity	0.00777037
GO:0055023	positive regulation of cardiac muscle tissue growth	0.00777037
GO:0043524	negative regulation of neuron apoptotic process	0.00781175
GO:0018210	peptidyl-threonine modification	0.00796767
GO:0001954	positive regulation of cell-matrix adhesion	0.00810836
GO:0001961	positive regulation of cytokine-mediated signaling pathway	0.00810836
GO:0002712	regulation of B cell mediated immunity	0.00810836
GO:0002889	regulation of immunoglobulin mediated immune response	0.00810836
GO:0031343	positive regulation of cell killing	0.00810836
GO:0038066	p38MAPK cascade	0.00810836
GO:0044003	modification by symbiont of host morphology or physiology	0.00810836
GO:0034250	positive regulation of cellular amide metabolic process	0.00812542
GO:0061008	hepaticobiliary system development	0.00812542
GO:2000241	regulation of reproductive process	0.00812542
GO:0001508	action potential	0.00828501
GO:0006754	ATP biosynthetic process	0.00844644
GO:0010770	positive regulation of cell morphogenesis involved in differentiation	0.00844644
GO:0030534	adult behavior	0.00844644
GO:0002043	blood vessel endothelial cell proliferation involved in sprouting angiogenesis	0.00845288
GO:0030199	collagen fibril organization	0.00845288
GO:0030809	negative regulation of nucleotide biosynthetic process	0.00845288
GO:0032720	negative regulation of tumor necrosis factor production	0.00845288
GO:0035094	response to nicotine	0.00845288
GO:0060986	endocrine hormone secretion	0.00845288
GO:1900372	negative regulation of purine nucleotide biosynthetic process	0.00845288
GO:0006606	protein import into nucleus	0.00860972
GO:0016202	regulation of striated muscle tissue development	0.00860972
GO:0035264	multicellular organism growth	0.00860972
GO:0035148	tube formation	0.00877486
GO:0043271	negative regulation of ion transport	0.00877486
GO:0002381	immunoglobulin production involved in immunoglobulin mediated immune response	0.00880388
GO:0005978	glycogen biosynthetic process	0.00880388
GO:0009250	glucan biosynthetic process	0.00880388
GO:0046580	negative regulation of Ras protein signal transduction	0.00880388
GO:0050433	regulation of catecholamine secretion	0.00880388
GO:0055010	ventricular cardiac muscle tissue morphogenesis	0.00880388
GO:0060324	face development	0.00880388
GO:1905953	negative regulation of lipid localization	0.00880388
GO:2000677	regulation of transcription regulatory region DNA binding	0.00880388
GO:0006661	phosphatidylinositol biosynthetic process	0.00894185
GO:1901861	regulation of muscle tissue development	0.00894185
GO:0051146	striated muscle cell differentiation	0.00912144
GO:0010171	body morphogenesis	0.00916134
GO:0060421	positive regulation of heart growth	0.00916134
GO:1903556	negative regulation of tumor necrosis factor superfamily cytokine production	0.00916134
GO:2000107	negative regulation of leukocyte apoptotic process	0.00916134
GO:0048634	regulation of muscle organ development	0.00928142
GO:0016331	morphogenesis of embryonic epithelium	0.00945401
GO:0030258	lipid modification	0.0094612
GO:0043687	post-translational protein modification	0.00951673
GO:0032890	regulation of organic acid transport	0.00952521
GO:0036092	phosphatidylinositol-3-phosphate biosynthetic process	0.00952521
GO:0060760	positive regulation of response to cytokine stimulus	0.00952521
GO:2001238	positive regulation of extrinsic apoptotic signaling pathway	0.00952521
GO:0071695	anatomical structure maturation	0.00962848
GO:0042220	response to cocaine	0.00989545
GO:0050432	catecholamine secretion	0.00989545
GO:0050701	interleukin-1 secretion	0.00989545
GO:0090288	negative regulation of cellular response to growth factor stimulus	0.0101632
GO:0046486	glycerolipid metabolic process	0.0102324
GO:0009620	response to fungus	0.010272
GO:0046626	regulation of insulin receptor signaling pathway	0.010272
GO:0050766	positive regulation of phagocytosis	0.010272
GO:0009206	purine ribonucleoside triphosphate biosynthetic process	0.0103452
GO:0009145	purine nucleoside triphosphate biosynthetic process	0.0105291
GO:0038127	ERBB signaling pathway	0.0105291
GO:0001960	negative regulation of cytokine-mediated signaling pathway	0.0106549
GO:0006584	catecholamine metabolic process	0.0106549
GO:0009712	catechol-containing compound metabolic process	0.0106549
GO:0010656	negative regulation of muscle cell apoptotic process	0.0106549
GO:0046068	cGMP metabolic process	0.0106549
GO:1903428	positive regulation of reactive oxygen species biosynthetic process	0.0106549
GO:0048285	organelle fission	0.0108885
GO:0003229	ventricular cardiac muscle tissue development	0.011044
GO:0051058	negative regulation of small GTPase mediated signal transduction	0.011044
GO:0051893	regulation of focal adhesion assembly	0.011044
GO:0090109	regulation of cell-substrate junction assembly	0.011044
GO:0090183	regulation of kidney development	0.011044
GO:0006260	DNA replication	0.0111561
GO:0030336	negative regulation of cell migration	0.0111561
GO:0015718	monocarboxylic acid transport	0.0112837
GO:0030203	glycosaminoglycan metabolic process	0.0112837
GO:0043010	camera-type eye development	0.0112842
GO:0032370	positive regulation of lipid transport	0.0114393
GO:0042130	negative regulation of T cell proliferation	0.0114393
GO:0070527	platelet aggregation	0.0114393
GO:2000242	negative regulation of reproductive process	0.0114393
GO:0007265	Ras protein signal transduction	0.0114734
GO:0006956	complement activation	0.0114771
GO:0009201	ribonucleoside triphosphate biosynthetic process	0.0114771
GO:0022408	negative regulation of cell-cell adhesion	0.0114771
GO:2001252	positive regulation of chromosome organization	0.0114771
GO:0031349	positive regulation of defense response	0.0117738
GO:0010721	negative regulation of cell development	0.011806
GO:0000186	activation of MAPKK activity	0.0118408
GO:0002637	regulation of immunoglobulin production	0.0118408
GO:0031279	regulation of cyclase activity	0.0118408
GO:0033627	cell adhesion mediated by integrin	0.0118408
GO:0045740	positive regulation of DNA replication	0.0118408
GO:0022604	regulation of cell morphogenesis	0.011977
GO:0030509	BMP signaling pathway	0.0120689
GO:0055002	striated muscle cell development	0.0120689
GO:0002532	production of molecular mediator involved in inflammatory response	0.0122485
GO:0030817	regulation of cAMP biosynthetic process	0.0122485
GO:0051339	regulation of lyase activity	0.0122485
GO:0060761	negative regulation of response to cytokine stimulus	0.0122485
GO:1900543	negative regulation of purine nucleotide metabolic process	0.0122485
GO:1903391	regulation of adherens junction organization	0.0122485
GO:0008360	regulation of cell shape	0.01227
GO:0008361	regulation of cell size	0.012473
GO:0051170	import into nucleus	0.012473
GO:0032651	regulation of interleukin-1 beta production	0.0126622
GO:0045428	regulation of nitric oxide biosynthetic process	0.0126622
GO:0045980	negative regulation of nucleotide metabolic process	0.0126622
GO:0097755	positive regulation of blood vessel diameter	0.0126622
GO:1903672	positive regulation of sprouting angiogenesis	0.0126622
GO:0009127	purine nucleoside monophosphate biosynthetic process	0.0126779
GO:0009168	purine ribonucleoside monophosphate biosynthetic process	0.0126779
GO:0001658	branching involved in ureteric bud morphogenesis	0.0130821
GO:0001910	regulation of leukocyte mediated cytotoxicity	0.0130821
GO:1904705	regulation of vascular smooth muscle cell proliferation	0.0130821
GO:1990874	vascular smooth muscle cell proliferation	0.0130821
GO:0030324	lung development	0.0130937
GO:0033044	regulation of chromosome organization	0.0131781
GO:2000146	negative regulation of cell motility	0.0131781
GO:0002703	regulation of leukocyte mediated immunity	0.0133044
GO:0045600	positive regulation of fat cell differentiation	0.0135079
GO:0045669	positive regulation of osteoblast differentiation	0.0135079
GO:0048247	lymphocyte chemotaxis	0.0135079
GO:0002040	sprouting angiogenesis	0.0135172
GO:0046328	regulation of JNK cascade	0.0135172
GO:0071347	cellular response to interleukin-1	0.0137318
GO:0010803	regulation of tumor necrosis factor-mediated signaling pathway	0.0139397
GO:0046622	positive regulation of organ growth	0.0139397
GO:0071385	cellular response to glucocorticoid stimulus	0.0139397
GO:0009142	nucleoside triphosphate biosynthetic process	0.0139484
GO:0019722	calcium-mediated signaling	0.0139484
GO:0030323	respiratory tube development	0.0139484
GO:0001959	regulation of cytokine-mediated signaling pathway	0.014167
GO:0006022	aminoglycan metabolic process	0.014167
GO:0002548	monocyte chemotaxis	0.0143775
GO:0050866	negative regulation of cell activation	0.0143875
GO:0009408	response to heat	0.0146099
GO:0071772	response to BMP	0.0146099
GO:0071773	cellular response to BMP stimulus	0.0146099
GO:0001907	killing by symbiont of host cells	0.0146435
GO:0002034	regulation of blood vessel diameter by renin-angiotensin	0.0146435
GO:0002513	tolerance induction to self antigen	0.0146435
GO:0002580	regulation of antigen processing and presentation of peptide or polysaccharide antigen via MHC class II	0.0146435
GO:0003072	renal control of peripheral vascular resistance involved in regulation of systemic arterial blood pressure	0.0146435
GO:0003105	negative regulation of glomerular filtration	0.0146435
GO:0003289	atrial septum primum morphogenesis	0.0146435
GO:0007406	negative regulation of neuroblast proliferation	0.0146435
GO:0010513	positive regulation of phosphatidylinositol biosynthetic process	0.0146435
GO:0015911	plasma membrane long-chain fatty acid transport	0.0146435
GO:0019732	antifungal humoral response	0.0146435
GO:0031536	positive regulation of exit from mitosis	0.0146435
GO:0033591	response to L-ascorbic acid	0.0146435
GO:0035744	T-helper 1 cell cytokine production	0.0146435
GO:0035926	chemokine (C-C motif) ligand 2 secretion	0.0146435
GO:0035934	corticosterone secretion	0.0146435
GO:0038033	positive regulation of endothelial cell chemotaxis by VEGF-activated vascular endothelial growth factor receptor signaling pathway	0.0146435
GO:0038044	transforming growth factor-beta secretion	0.0146435
GO:0042695	thelarche	0.0146435
GO:0044004	disruption by symbiont of host cell	0.0146435
GO:0045113	regulation of integrin biosynthetic process	0.0146435
GO:0045409	negative regulation of interleukin-6 biosynthetic process	0.0146435
GO:0046642	negative regulation of alpha-beta T cell proliferation	0.0146435
GO:0046813	receptor-mediated virion attachment to host cell	0.0146435
GO:0048298	positive regulation of isotype switching to IgA isotypes	0.0146435
GO:0048818	positive regulation of hair follicle maturation	0.0146435
GO:0051891	positive regulation of cardioblast differentiation	0.0146435
GO:0060744	mammary gland branching involved in thelarche	0.0146435
GO:0060751	branch elongation involved in mammary gland duct branching	0.0146435
GO:0060762	regulation of branching involved in mammary gland duct morphogenesis	0.0146435
GO:0061302	smooth muscle cell-matrix adhesion	0.0146435
GO:0061419	positive regulation of transcription from RNA polymerase II promoter in response to hypoxia	0.0146435
GO:0061744	motor behavior	0.0146435
GO:0072679	thymocyte migration	0.0146435
GO:0090259	regulation of retinal ganglion cell axon guidance	0.0146435
GO:0090325	regulation of locomotion involved in locomotory behavior	0.0146435
GO:0099541	trans-synaptic signaling by lipid	0.0146435
GO:0099542	trans-synaptic signaling by endocannabinoid	0.0146435
GO:1900086	positive regulation of peptidyl-tyrosine autophosphorylation	0.0146435
GO:1903911	positive regulation of receptor clustering	0.0146435
GO:1903998	regulation of eating behavior	0.0146435
GO:1905007	positive regulation of epithelial to mesenchymal transition involved in endocardial cushion formation	0.0146435
GO:2000048	negative regulation of cell-cell adhesion mediated by cadherin	0.0146435
GO:2000851	positive regulation of glucocorticoid secretion	0.0146435
GO:0051962	positive regulation of nervous system development	0.014723
GO:0002699	positive regulation of immune effector process	0.0148343
GO:0042698	ovulation cycle	0.0152707
GO:0051937	catecholamine transport	0.0152707
GO:0060675	ureteric bud morphogenesis	0.0152707
GO:0042594	response to starvation	0.015289
GO:0055001	muscle cell development	0.015289
GO:0009156	ribonucleoside monophosphate biosynthetic process	0.0155193
GO:0007585	respiratory gaseous exchange	0.0157261
GO:0042116	macrophage activation	0.0157261
GO:0071384	cellular response to corticosteroid stimulus	0.0157261
GO:0072171	mesonephric tubule morphogenesis	0.0157261
GO:0001101	response to acid chemical	0.015897
GO:0060759	regulation of response to cytokine stimulus	0.0159858
GO:0007219	Notch signaling pathway	0.016222
GO:1905330	regulation of morphogenesis of an epithelium	0.016222
GO:0006110	regulation of glycolytic process	0.0166543
GO:0030500	regulation of bone mineralization	0.0166543
GO:0032760	positive regulation of tumor necrosis factor production	0.0166543
GO:0051705	multi-organism behavior	0.0166543
GO:0010038	response to metal ion	0.0167106
GO:0031331	positive regulation of cellular catabolic process	0.0168764
GO:0051216	cartilage development	0.0169424
GO:0007178	transmembrane receptor protein serine/threonine kinase signaling pathway	0.0170432
GO:0030810	positive regulation of nucleotide biosynthetic process	0.017127
GO:0033692	cellular polysaccharide biosynthetic process	0.017127
GO:0055008	cardiac muscle tissue morphogenesis	0.017127
GO:1900373	positive regulation of purine nucleotide biosynthetic process	0.017127
GO:0002278	eosinophil activation involved in immune response	0.0175469
GO:0002447	eosinophil mediated immunity	0.0175469
GO:0003057	regulation of the force of heart contraction by chemical signal	0.0175469
GO:0003100	regulation of systemic arterial blood pressure by endothelin	0.0175469
GO:0003278	apoptotic process involved in heart morphogenesis	0.0175469
GO:0003284	septum primum development	0.0175469
GO:0007182	common-partner SMAD protein phosphorylation	0.0175469
GO:0010749	regulation of nitric oxide mediated signal transduction	0.0175469
GO:0032106	positive regulation of response to extracellular stimulus	0.0175469
GO:0032109	positive regulation of response to nutrient levels	0.0175469
GO:0032914	positive regulation of transforming growth factor beta1 production	0.0175469
GO:0035482	gastric motility	0.0175469
GO:0035701	hematopoietic stem cell migration	0.0175469
GO:0035739	CD4-positive, alpha-beta T cell proliferation	0.0175469
GO:0035947	regulation of gluconeogenesis by regulation of transcription from RNA polymerase II promoter	0.0175469
GO:0042536	negative regulation of tumor necrosis factor biosynthetic process	0.0175469
GO:0042713	sperm ejaculation	0.0175469
GO:0043152	induction of bacterial agglutination	0.0175469
GO:0043308	eosinophil degranulation	0.0175469
GO:0045112	integrin biosynthetic process	0.0175469
GO:0048296	regulation of isotype switching to IgA isotypes	0.0175469
GO:0052564	response to immune response of other organism involved in symbiotic interaction	0.0175469
GO:0052572	response to host immune response	0.0175469
GO:0060298	positive regulation of sarcomere organization	0.0175469
GO:0060405	regulation of penile erection	0.0175469
GO:0061760	antifungal innate immune response	0.0175469
GO:0071895	odontoblast differentiation	0.0175469
GO:1900084	regulation of peptidyl-tyrosine autophosphorylation	0.0175469
GO:1901164	negative regulation of trophoblast cell migration	0.0175469
GO:1901727	positive regulation of histone deacetylase activity	0.0175469
GO:1903121	regulation of TRAIL-activated apoptotic signaling pathway	0.0175469
GO:1904304	regulation of gastro-intestinal system smooth muscle contraction	0.0175469
GO:1904306	positive regulation of gastro-intestinal system smooth muscle contraction	0.0175469
GO:1905005	regulation of epithelial to mesenchymal transition involved in endocardial cushion formation	0.0175469
GO:1905460	negative regulation of vascular associated smooth muscle cell apoptotic process	0.0175469
GO:2000110	negative regulation of macrophage apoptotic process	0.0175469
GO:2000503	positive regulation of natural killer cell chemotaxis	0.0175469
GO:2000553	positive regulation of T-helper 2 cell cytokine production	0.0175469
GO:2000561	regulation of CD4-positive, alpha-beta T cell proliferation	0.0175469
GO:0006809	nitric oxide biosynthetic process	0.0176054
GO:0032945	negative regulation of mononuclear cell proliferation	0.0176054
GO:0050672	negative regulation of lymphocyte proliferation	0.0176054
GO:0055021	regulation of cardiac muscle tissue growth	0.0176054
GO:0035690	cellular response to drug	0.017721
GO:1901215	negative regulation of neuron death	0.0179305
GO:0001937	negative regulation of endothelial cell proliferation	0.0180894
GO:1903557	positive regulation of tumor necrosis factor superfamily cytokine production	0.0180894
GO:0009124	nucleoside monophosphate biosynthetic process	0.0181825
GO:0001654	eye development	0.0184154
GO:0006171	cAMP biosynthetic process	0.018579
GO:0008306	associative learning	0.018579
GO:0030811	regulation of nucleotide catabolic process	0.018579
GO:0031341	regulation of cell killing	0.018579
GO:0002573	myeloid leukocyte differentiation	0.0186924
GO:0097305	response to alcohol	0.0186924
GO:1903829	positive regulation of cellular protein localization	0.0189472
GO:0070555	response to interleukin-1	0.0189504
GO:0090316	positive regulation of intracellular protein transport	0.0189504
GO:0048844	artery morphogenesis	0.0190743
GO:0060541	respiratory system development	0.0192103
GO:0051098	regulation of binding	0.0193071
GO:0045862	positive regulation of proteolysis	0.0194886
GO:0003208	cardiac ventricle morphogenesis	0.0195751
GO:0046209	nitric oxide metabolic process	0.0195751
GO:0070509	calcium ion import	0.0195751
GO:0070664	negative regulation of leukocyte proliferation	0.0195751
GO:0072078	nephron tubule morphogenesis	0.0195751
GO:0032755	positive regulation of interleukin-6 production	0.0200814
GO:0034109	homotypic cell-cell adhesion	0.0200814
GO:0010001	glial cell differentiation	0.0202698
GO:0016064	immunoglobulin mediated immune response	0.0202698
GO:0042176	regulation of protein catabolic process	0.0204121
GO:0002578	negative regulation of antigen processing and presentation	0.0204418
GO:0002741	positive regulation of cytokine secretion involved in immune response	0.0204418
GO:0002826	negative regulation of T-helper 1 type immune response	0.0204418
GO:0003321	positive regulation of blood pressure by epinephrine-norepinephrine	0.0204418
GO:0010511	regulation of phosphatidylinositol biosynthetic process	0.0204418
GO:0019064	fusion of virus membrane with host plasma membrane	0.0204418
GO:0023041	neuronal signal transduction	0.0204418
GO:0031077	post-embryonic camera-type eye development	0.0204418
GO:0032277	negative regulation of gonadotropin secretion	0.0204418
GO:0032825	positive regulation of natural killer cell differentiation	0.0204418
GO:0033684	regulation of luteinizing hormone secretion	0.0204418
GO:0034141	positive regulation of toll-like receptor 3 signaling pathway	0.0204418
GO:0038089	positive regulation of cell migration by vascular endothelial growth factor signaling pathway	0.0204418
GO:0039663	membrane fusion involved in viral entry into host cell	0.0204418
GO:0043307	eosinophil activation	0.0204418
GO:0044332	Wnt signaling pathway involved in dorsal/ventral axis specification	0.0204418
GO:0044800	multi-organism membrane fusion	0.0204418
GO:0045916	negative regulation of complement activation	0.0204418
GO:0046543	development of secondary female sexual characteristics	0.0204418
GO:0048290	isotype switching to IgA isotypes	0.0204418
GO:0048702	embryonic neurocranium morphogenesis	0.0204418
GO:0048842	positive regulation of axon extension involved in axon guidance	0.0204418
GO:0051890	regulation of cardioblast differentiation	0.0204418
GO:0052173	response to defenses of other organism involved in symbiotic interaction	0.0204418
GO:0052200	response to host defenses	0.0204418
GO:0061043	regulation of vascular wound healing	0.0204418
GO:0061626	pharyngeal arch artery morphogenesis	0.0204418
GO:0070459	prolactin secretion	0.0204418
GO:0071389	cellular response to mineralocorticoid stimulus	0.0204418
GO:0075136	response to host	0.0204418
GO:0097475	motor neuron migration	0.0204418
GO:1901374	acetate ester transport	0.0204418
GO:1904468	negative regulation of tumor necrosis factor secretion	0.0204418
GO:2000049	positive regulation of cell-cell adhesion mediated by cadherin	0.0204418
GO:2000192	negative regulation of fatty acid transport	0.0204418
GO:2000258	negative regulation of protein activation cascade	0.0204418
GO:2000465	regulation of glycogen (starch) synthase activity	0.0204418
GO:2000669	negative regulation of dendritic cell apoptotic process	0.0204418
GO:2000848	positive regulation of corticosteroid hormone secretion	0.0204418
GO:2001027	negative regulation of endothelial cell chemotaxis	0.0204418
GO:2001185	regulation of CD8-positive, alpha-beta T cell activation	0.0204418
GO:0019724	B cell mediated immunity	0.0205396
GO:0003151	outflow tract morphogenesis	0.0205931
GO:0015844	monoamine transport	0.0205931
GO:0030512	negative regulation of transforming growth factor beta receptor signaling pathway	0.0205931
GO:0043470	regulation of carbohydrate catabolic process	0.0205931
GO:0060420	regulation of heart growth	0.0205931
GO:0072088	nephron epithelium morphogenesis	0.0205931
GO:0090049	regulation of cell migration involved in sprouting angiogenesis	0.0205931
GO:1905954	positive regulation of lipid localization	0.0205931
GO:2001169	regulation of ATP biosynthetic process	0.0205931
GO:0032535	regulation of cellular component size	0.020979
GO:0007254	JNK cascade	0.0210853
GO:0005977	glycogen metabolic process	0.0211103
GO:2001057	reactive nitrogen species metabolic process	0.0211103
GO:0002824	positive regulation of adaptive immune response based on somatic recombination of immune receptors built from immunoglobulin superfamily domains	0.021633
GO:0006073	cellular glucan metabolic process	0.021633
GO:0043537	negative regulation of blood vessel endothelial cell migration	0.021633
GO:0044042	glucan metabolic process	0.021633
GO:0061333	renal tubule morphogenesis	0.021633
GO:0072028	nephron morphogenesis	0.021633
GO:1903845	negative regulation of cellular response to transforming growth factor beta stimulus	0.021633
GO:0007266	Rho protein signal transduction	0.0216389
GO:0001570	vasculogenesis	0.0221609
GO:0007009	plasma membrane organization	0.0221609
GO:0030802	regulation of cyclic nucleotide biosynthetic process	0.0221609
GO:0030814	regulation of cAMP metabolic process	0.0221609
GO:1901216	positive regulation of neuron death	0.0221609
GO:0006888	ER to Golgi vesicle-mediated transport	0.0224842
GO:0007492	endoderm development	0.0226943
GO:0007584	response to nutrient	0.0230577
GO:0002708	positive regulation of lymphocyte mediated immunity	0.0232329
GO:0002118	aggressive behavior	0.0233284
GO:0002725	negative regulation of T cell cytokine production	0.0233284
GO:0010700	negative regulation of norepinephrine secretion	0.0233284
GO:0021940	positive regulation of cerebellar granule cell precursor proliferation	0.0233284
GO:0031620	regulation of fever generation	0.0233284
GO:0032627	interleukin-23 production	0.0233284
GO:0032667	regulation of interleukin-23 production	0.0233284
GO:0032906	transforming growth factor beta2 production	0.0233284
GO:0032909	regulation of transforming growth factor beta2 production	0.0233284
GO:0034135	regulation of toll-like receptor 2 signaling pathway	0.0233284
GO:0034350	regulation of glial cell apoptotic process	0.0233284
GO:0034351	negative regulation of glial cell apoptotic process	0.0233284
GO:0043084	penile erection	0.0233284
GO:0044803	multi-organism membrane organization	0.0233284
GO:0060059	embryonic retina morphogenesis in camera-type eye	0.0233284
GO:0060137	maternal process involved in parturition	0.0233284
GO:0060155	platelet dense granule organization	0.0233284
GO:0060215	primitive hemopoiesis	0.0233284
GO:0060638	mesenchymal-epithelial cell signaling	0.0233284
GO:0070099	regulation of chemokine-mediated signaling pathway	0.0233284
GO:0071679	commissural neuron axon guidance	0.0233284
GO:0072608	interleukin-10 secretion	0.0233284
GO:0090045	positive regulation of deacetylase activity	0.0233284
GO:0097084	vascular smooth muscle cell development	0.0233284
GO:0099550	trans-synaptic signaling, modulating synaptic transmission	0.0233284
GO:1900165	negative regulation of interleukin-6 secretion	0.0233284
GO:1900426	positive regulation of defense response to bacterium	0.0233284
GO:1901299	negative regulation of hydrogen peroxide-mediated programmed cell death	0.0233284
GO:1901725	regulation of histone deacetylase activity	0.0233284
GO:1902669	positive regulation of axon guidance	0.0233284
GO:1903054	negative regulation of extracellular matrix organization	0.0233284
GO:1903430	negative regulation of cell maturation	0.0233284
GO:1903799	negative regulation of production of miRNAs involved in gene silencing by miRNA	0.0233284
GO:1903800	positive regulation of production of miRNAs involved in gene silencing by miRNA	0.0233284
GO:1905906	regulation of amyloid fibril formation	0.0233284
GO:2000508	regulation of dendritic cell chemotaxis	0.0233284
GO:2000510	positive regulation of dendritic cell chemotaxis	0.0233284
GO:0002821	positive regulation of adaptive immune response	0.0237768
GO:0045921	positive regulation of exocytosis	0.0237768
GO:0050772	positive regulation of axonogenesis	0.0237768
GO:0060415	muscle tissue morphogenesis	0.0237768
GO:1901888	regulation of cell junction assembly	0.0237768
GO:0001894	tissue homeostasis	0.0242287
GO:0045445	myoblast differentiation	0.0243259
GO:0046849	bone remodeling	0.0243259
GO:0070098	chemokine-mediated signaling pathway	0.0243259
GO:0010660	regulation of muscle cell apoptotic process	0.0248802
GO:0034637	cellular carbohydrate biosynthetic process	0.0248802
GO:0044070	regulation of anion transport	0.0248802

## Sheet: Table S02-3
ID	Description	P_value
GO:0060333	interferon-gamma-mediated signaling pathway	2.1137e-36
GO:0071346	cellular response to interferon-gamma	7.60289e-33
GO:0034341	response to interferon-gamma	1.40367e-31
GO:0002478	antigen processing and presentation of exogenous peptide antigen	8.22933e-21
GO:0019884	antigen processing and presentation of exogenous antigen	1.70065e-20
GO:0019882	antigen processing and presentation	2.14402e-20
GO:0048002	antigen processing and presentation of peptide antigen	3.09389e-20
GO:0071356	cellular response to tumor necrosis factor	1.25227e-19
GO:0033209	tumor necrosis factor-mediated signaling pathway	2.71091e-19
GO:0034612	response to tumor necrosis factor	4.18342e-19
GO:1903037	regulation of leukocyte cell-cell adhesion	7.96e-18
GO:0022409	positive regulation of cell-cell adhesion	9.7577e-18
GO:1903039	positive regulation of leukocyte cell-cell adhesion	2.27561e-17
GO:0022407	regulation of cell-cell adhesion	4.67059e-17
GO:0007159	leukocyte cell-cell adhesion	5.49899e-17
GO:0002479	antigen processing and presentation of exogenous peptide antigen via MHC class I, TAP-dependent	1.72797e-16
GO:0042590	antigen processing and presentation of exogenous peptide antigen via MHC class I	2.84572e-16
GO:0042110	T cell activation	1.40122e-15
GO:0031349	positive regulation of defense response	1.58504e-15
GO:0002474	antigen processing and presentation of peptide antigen via MHC class I	2.97509e-15
GO:0050863	regulation of T cell activation	9.35311e-15
GO:0007189	adenylate cyclase-activating G-protein coupled receptor signaling pathway	1.04348e-14
GO:0031295	T cell costimulation	1.2637e-14
GO:0031294	lymphocyte costimulation	1.4665e-14
GO:0045785	positive regulation of cell adhesion	1.61999e-14
GO:0019932	second-messenger-mediated signaling	2.64986e-14
GO:0019933	cAMP-mediated signaling	3.00072e-14
GO:0060337	type I interferon signaling pathway	6.64823e-14
GO:0071357	cellular response to type I interferon	6.64823e-14
GO:0019935	cyclic-nucleotide-mediated signaling	7.60248e-14
GO:0034340	response to type I interferon	1.23704e-13
GO:0050870	positive regulation of T cell activation	1.45628e-13
GO:0002237	response to molecule of bacterial origin	4.89155e-13
GO:0007187	G-protein coupled receptor signaling pathway, coupled to cyclic nucleotide second messenger	6.67832e-13
GO:0007188	adenylate cyclase-modulating G-protein coupled receptor signaling pathway	1.26774e-12
GO:0050852	T cell receptor signaling pathway	1.35164e-12
GO:0051249	regulation of lymphocyte activation	2.87239e-12
GO:0001819	positive regulation of cytokine production	6.9765e-12
GO:0002696	positive regulation of leukocyte activation	9.22761e-12
GO:0050867	positive regulation of cell activation	1.48751e-11
GO:0051251	positive regulation of lymphocyte activation	2.93152e-11
GO:0032496	response to lipopolysaccharide	4.81883e-11
GO:0050851	antigen receptor-mediated signaling pathway	1.02352e-10
GO:0002480	antigen processing and presentation of exogenous peptide antigen via MHC class I, TAP-independent	1.21918e-10
GO:0051047	positive regulation of secretion	4.56985e-10
GO:0002793	positive regulation of peptide secretion	5.43058e-10
GO:0062012	regulation of small molecule metabolic process	8.48946e-10
GO:1903532	positive regulation of secretion by cell	2.1064e-09
GO:0002429	immune response-activating cell surface receptor signaling pathway	3.10113e-09
GO:0050714	positive regulation of protein secretion	3.11287e-09
GO:0042108	positive regulation of cytokine biosynthetic process	3.13034e-09
GO:0002791	regulation of peptide secretion	3.57192e-09
GO:0042035	regulation of cytokine biosynthetic process	4.70341e-09
GO:0002768	immune response-regulating cell surface receptor signaling pathway	7.44199e-09
GO:0006898	receptor-mediated endocytosis	8.39496e-09
GO:0042089	cytokine biosynthetic process	1.04458e-08
GO:0042107	cytokine metabolic process	1.1262e-08
GO:0001666	response to hypoxia	1.42165e-08
GO:0031649	heat generation	1.4488e-08
GO:0050708	regulation of protein secretion	1.5272e-08
GO:0070661	leukocyte proliferation	1.56537e-08
GO:0045089	positive regulation of innate immune response	1.77497e-08
GO:0036293	response to decreased oxygen levels	1.83142e-08
GO:0023061	signal release	1.95556e-08
GO:0043487	regulation of RNA stability	2.63056e-08
GO:0002824	positive regulation of adaptive immune response based on somatic recombination of immune receptors built from immunoglobulin superfamily domains	2.6693e-08
GO:0042098	T cell proliferation	3.56547e-08
GO:0070482	response to oxygen levels	3.77355e-08
GO:0002821	positive regulation of adaptive immune response	3.81014e-08
GO:0050729	positive regulation of inflammatory response	3.87876e-08
GO:0046879	hormone secretion	4.18989e-08
GO:0038061	NIK/NF-kappaB signaling	4.3964e-08
GO:0002819	regulation of adaptive immune response	5.95823e-08
GO:0009914	hormone transport	6.19859e-08
GO:0070665	positive regulation of leukocyte proliferation	9.98923e-08
GO:0042102	positive regulation of T cell proliferation	1.24431e-07
GO:0045088	regulation of innate immune response	1.42264e-07
GO:0042129	regulation of T cell proliferation	1.61732e-07
GO:0006521	regulation of cellular amino acid metabolic process	1.73146e-07
GO:0032735	positive regulation of interleukin-12 production	1.81164e-07
GO:0032729	positive regulation of interferon-gamma production	1.91084e-07
GO:0070663	regulation of leukocyte proliferation	1.9387e-07
GO:0002758	innate immune response-activating signal transduction	2.13635e-07
GO:1903706	regulation of hemopoiesis	2.50129e-07
GO:0043488	regulation of mRNA stability	2.79653e-07
GO:0060071	Wnt signaling pathway, planar cell polarity pathway	3.17529e-07
GO:0090175	regulation of establishment of planar polarity	3.59169e-07
GO:0002218	activation of innate immune response	3.77153e-07
GO:0006171	cAMP biosynthetic process	4.32508e-07
GO:0031146	SCF-dependent proteasomal ubiquitin-dependent protein catabolic process	5.10793e-07
GO:0046718	viral entry into host cell	5.42961e-07
GO:0002460	adaptive immune response based on somatic recombination of immune receptors built from immunoglobulin superfamily domains	5.55527e-07
GO:0002822	regulation of adaptive immune response based on somatic recombination of immune receptors built from immunoglobulin superfamily domains	5.74738e-07
GO:0001659	temperature homeostasis	5.77166e-07
GO:0019058	viral life cycle	5.88684e-07
GO:0030072	peptide hormone secretion	6.12495e-07
GO:0001736	establishment of planar polarity	6.42997e-07
GO:0007164	establishment of tissue polarity	6.42997e-07
GO:0061013	regulation of mRNA catabolic process	7.15621e-07
GO:1905330	regulation of morphogenesis of an epithelium	7.15621e-07
GO:0046887	positive regulation of hormone secretion	8.00088e-07
GO:0050727	regulation of inflammatory response	8.04825e-07
GO:0033238	regulation of cellular amine metabolic process	8.18161e-07
GO:0061418	regulation of transcription from RNA polymerase II promoter in response to hypoxia	8.18161e-07
GO:0031145	anaphase-promoting complex-dependent catabolic process	8.81667e-07
GO:0048871	multicellular organismal homeostasis	1.00102e-06
GO:0046651	lymphocyte proliferation	1.0761e-06
GO:0050671	positive regulation of lymphocyte proliferation	1.09536e-06
GO:0046883	regulation of hormone secretion	1.11093e-06
GO:0070555	response to interleukin-1	1.1173e-06
GO:0032943	mononuclear cell proliferation	1.14674e-06
GO:0032946	positive regulation of mononuclear cell proliferation	1.15249e-06
GO:0051222	positive regulation of protein transport	1.16965e-06
GO:0048305	immunoglobulin secretion	1.17292e-06
GO:0009308	amine metabolic process	1.27426e-06
GO:0030260	entry into host cell	1.27426e-06
GO:0044409	entry into host	1.27426e-06
GO:0051806	entry into cell of other organism involved in symbiotic interaction	1.27426e-06
GO:0051828	entry into other organism involved in symbiotic interaction	1.27426e-06
GO:1901655	cellular response to ketone	1.35315e-06
GO:0001738	morphogenesis of a polarized epithelium	1.40664e-06
GO:0090263	positive regulation of canonical Wnt signaling pathway	1.40664e-06
GO:0007254	JNK cascade	1.51832e-06
GO:0050670	regulation of lymphocyte proliferation	1.57615e-06
GO:0032944	regulation of mononuclear cell proliferation	1.63585e-06
GO:0032655	regulation of interleukin-12 production	1.80059e-06
GO:0032649	regulation of interferon-gamma production	1.88793e-06
GO:0090277	positive regulation of peptide hormone secretion	2.01318e-06
GO:0032615	interleukin-12 production	2.19475e-06
GO:0031622	positive regulation of fever generation	2.25048e-06
GO:0097646	calcitonin family receptor signaling pathway	2.25048e-06
GO:0009187	cyclic nucleotide metabolic process	2.25433e-06
GO:0051701	interaction with host	2.2656e-06
GO:1904951	positive regulation of establishment of protein localization	2.51122e-06
GO:0032103	positive regulation of response to external stimulus	2.57408e-06
GO:0031667	response to nutrient levels	2.67274e-06
GO:0016579	protein deubiquitination	2.72364e-06
GO:0010972	negative regulation of G2/M transition of mitotic cell cycle	2.74552e-06
GO:0030801	positive regulation of cyclic nucleotide metabolic process	2.90998e-06
GO:0019886	antigen processing and presentation of exogenous peptide antigen via MHC class II	2.91522e-06
GO:0050900	leukocyte migration	2.96228e-06
GO:0035567	non-canonical Wnt signaling pathway	3.07282e-06
GO:0070498	interleukin-1-mediated signaling pathway	3.28029e-06
GO:0002495	antigen processing and presentation of peptide antigen via MHC class II	3.4763e-06
GO:0031620	regulation of fever generation	3.59022e-06
GO:0038042	dimeric G-protein coupled receptor signaling pathway	3.59022e-06
GO:0002504	antigen processing and presentation of peptide or polysaccharide antigen via MHC class II	3.68175e-06
GO:0032609	interferon-gamma production	3.68175e-06
GO:0097755	positive regulation of blood vessel diameter	3.79675e-06
GO:0002521	leukocyte differentiation	3.84774e-06
GO:0052652	cyclic purine nucleotide metabolic process	3.89698e-06
GO:1902036	regulation of hematopoietic stem cell differentiation	3.89698e-06
GO:0070646	protein modification by small protein removal	4.10417e-06
GO:0009190	cyclic nucleotide biosynthetic process	4.12234e-06
GO:0030799	regulation of cyclic nucleotide metabolic process	4.12234e-06
GO:0046058	cAMP metabolic process	4.35819e-06
GO:0003018	vascular process in circulatory system	4.66122e-06
GO:0009991	response to extracellular stimulus	4.86297e-06
GO:1902750	negative regulation of cell cycle G2/M phase transition	5.41403e-06
GO:0046328	regulation of JNK cascade	5.68176e-06
GO:0070374	positive regulation of ERK1 and ERK2 cascade	5.69744e-06
GO:0045930	negative regulation of mitotic cell cycle	5.75057e-06
GO:0071347	cellular response to interleukin-1	5.90668e-06
GO:0030177	positive regulation of Wnt signaling pathway	6.13896e-06
GO:1901532	regulation of hematopoietic progenitor cell differentiation	6.33507e-06
GO:0090090	negative regulation of canonical Wnt signaling pathway	6.37879e-06
GO:0060218	hematopoietic stem cell differentiation	6.66891e-06
GO:0038093	Fc receptor signaling pathway	7.0408e-06
GO:0070371	ERK1 and ERK2 cascade	7.19756e-06
GO:2000027	regulation of organ morphogenesis	7.6936e-06
GO:2000116	regulation of cysteine-type endopeptidase activity	7.6936e-06
GO:0043618	regulation of transcription from RNA polymerase II promoter in response to stress	8.98504e-06
GO:1901654	response to ketone	9.5731e-06
GO:0043507	positive regulation of JUN kinase activity	9.65536e-06
GO:0031652	positive regulation of heat generation	1.04856e-05
GO:0030816	positive regulation of cAMP metabolic process	1.07531e-05
GO:0002223	stimulatory C-type lectin receptor signaling pathway	1.08628e-05
GO:0046330	positive regulation of JNK cascade	1.13786e-05
GO:0043620	regulation of DNA-templated transcription in response to stress	1.19141e-05
GO:0002220	innate immune response activating cell surface receptor signaling pathway	1.24698e-05
GO:0044106	cellular amine metabolic process	1.24698e-05
GO:0051403	stress-activated MAPK cascade	1.27848e-05
GO:0001660	fever generation	1.39399e-05
GO:0043116	negative regulation of vascular permeability	1.39399e-05
GO:0048143	astrocyte activation	1.39399e-05
GO:0035296	regulation of tube diameter	1.55719e-05
GO:0045807	positive regulation of endocytosis	1.55719e-05
GO:0097746	regulation of blood vessel diameter	1.55719e-05
GO:0010959	regulation of metal ion transport	1.61799e-05
GO:0030814	regulation of cAMP metabolic process	1.64214e-05
GO:0071260	cellular response to mechanical stimulus	1.64214e-05
GO:0071456	cellular response to hypoxia	1.65026e-05
GO:0071229	cellular response to acid chemical	1.70461e-05
GO:0031650	regulation of heat generation	1.80688e-05
GO:0044130	negative regulation of growth of symbiont in host	1.80688e-05
GO:0090276	regulation of peptide hormone secretion	1.87661e-05
GO:0001503	ossification	1.92257e-05
GO:0036294	cellular response to decreased oxygen levels	2.06271e-05
GO:1905952	regulation of lipid localization	2.09337e-05
GO:0030178	negative regulation of Wnt signaling pathway	2.12803e-05
GO:0050880	regulation of blood vessel size	2.18081e-05
GO:1903311	regulation of mRNA metabolic process	2.26156e-05
GO:0035150	regulation of tube size	2.27118e-05
GO:0044126	regulation of growth of symbiont in host	2.29293e-05
GO:0044146	negative regulation of growth of symbiont involved in interaction with host	2.29293e-05
GO:0051092	positive regulation of NF-kappaB transcription factor activity	2.36453e-05
GO:2000736	regulation of stem cell differentiation	2.36453e-05
GO:0043506	regulation of JUN kinase activity	2.49571e-05
GO:0006401	RNA catabolic process	2.52158e-05
GO:1903793	positive regulation of anion transport	2.53215e-05
GO:0031098	stress-activated protein kinase signaling cascade	2.68371e-05
GO:0045981	positive regulation of nucleotide metabolic process	2.79364e-05
GO:1900544	positive regulation of purine nucleotide metabolic process	2.79364e-05
GO:0032872	regulation of stress-activated MAPK cascade	2.7966e-05
GO:0043281	regulation of cysteine-type endopeptidase activity involved in apoptotic process	2.7966e-05
GO:0044144	modulation of growth of symbiont involved in interaction with host	2.85778e-05
GO:0070302	regulation of stress-activated protein kinase signaling cascade	2.88052e-05
GO:0030099	myeloid cell differentiation	3.08425e-05
GO:0043903	regulation of symbiosis, encompassing mutualism through parasitism	3.33186e-05
GO:0071453	cellular response to oxygen levels	3.33186e-05
GO:0043154	negative regulation of cysteine-type endopeptidase activity involved in apoptotic process	3.47191e-05
GO:0032874	positive regulation of stress-activated MAPK cascade	3.47959e-05
GO:0003085	negative regulation of systemic arterial blood pressure	3.50697e-05
GO:0048535	lymph node development	3.50697e-05
GO:0070304	positive regulation of stress-activated protein kinase signaling cascade	3.61101e-05
GO:0070372	regulation of ERK1 and ERK2 cascade	3.81439e-05
GO:0015850	organic hydroxy compound transport	3.94875e-05
GO:0044117	growth of symbiont in host	4.246e-05
GO:0051023	regulation of immunoglobulin secretion	4.246e-05
GO:0042180	cellular ketone metabolic process	4.40995e-05
GO:0052548	regulation of endopeptidase activity	4.53432e-05
GO:1901991	negative regulation of mitotic cell cycle phase transition	4.9145e-05
GO:0044110	growth involved in symbiotic interaction	5.0803e-05
GO:0044116	growth of symbiont involved in interaction with host	5.0803e-05
GO:0033138	positive regulation of peptidyl-serine phosphorylation	5.46338e-05
GO:0043270	positive regulation of ion transport	5.46549e-05
GO:0045123	cellular extravasation	5.49902e-05
GO:0001101	response to acid chemical	5.67271e-05
GO:0010565	regulation of cellular ketone metabolic process	5.90824e-05
GO:0062013	positive regulation of small molecule metabolic process	5.90824e-05
GO:0002029	desensitization of G-protein coupled receptor protein signaling pathway	6.01521e-05
GO:0002544	chronic inflammatory response	6.01521e-05
GO:0022401	negative adaptation of signaling pathway	6.01521e-05
GO:0045926	negative regulation of growth	6.06614e-05
GO:0051091	positive regulation of DNA binding transcription factor activity	6.22446e-05
GO:0010038	response to metal ion	6.30568e-05
GO:0071398	cellular response to fatty acid	6.40408e-05
GO:0043112	receptor metabolic process	7.19519e-05
GO:0043901	negative regulation of multi-organism process	7.19519e-05
GO:0052547	regulation of peptidase activity	7.37617e-05
GO:0071222	cellular response to lipopolysaccharide	7.67067e-05
GO:1901988	negative regulation of cell cycle phase transition	8.20061e-05
GO:0023058	adaptation of signaling pathway	8.20794e-05
GO:0030817	regulation of cAMP biosynthetic process	8.5333e-05
GO:0045453	bone resorption	8.5333e-05
GO:0072577	endothelial cell apoptotic process	8.5333e-05
GO:0006402	mRNA catabolic process	8.91497e-05
GO:0038095	Fc-epsilon receptor signaling pathway	8.9697e-05
GO:2000117	negative regulation of cysteine-type endopeptidase activity	8.98337e-05
GO:0032753	positive regulation of interleukin-4 production	9.47614e-05
GO:0071379	cellular response to prostaglandin stimulus	9.47614e-05
GO:0042176	regulation of protein catabolic process	9.64418e-05
GO:0071902	positive regulation of protein serine/threonine kinase activity	9.64418e-05
GO:0060828	regulation of canonical Wnt signaling pathway	9.70558e-05
GO:0071219	cellular response to molecule of bacterial origin	9.82954e-05
GO:0002700	regulation of production of molecular mediator of immune response	0.000106227
GO:0030819	positive regulation of cAMP biosynthetic process	0.000108657
GO:0043406	positive regulation of MAP kinase activity	0.000109127
GO:0046631	alpha-beta T cell activation	0.000110662
GO:0002244	hematopoietic progenitor cell differentiation	0.000110768
GO:0031348	negative regulation of defense response	0.000114074
GO:0010499	proteasomal ubiquitin-independent protein catabolic process	0.000123817
GO:0002573	myeloid leukocyte differentiation	0.000128093
GO:0097305	response to alcohol	0.000128093
GO:1900542	regulation of purine nucleotide metabolic process	0.000139479
GO:0010876	lipid localization	0.000145977
GO:0010389	regulation of G2/M transition of mitotic cell cycle	0.000155893
GO:0002396	MHC protein complex assembly	0.000162753
GO:0008628	hormone-mediated apoptotic signaling pathway	0.000162753
GO:0022614	membrane to membrane docking	0.000162753
GO:0034756	regulation of iron ion transport	0.000162753
GO:0035934	corticosterone secretion	0.000162753
GO:0043435	response to corticotropin-releasing hormone	0.000162753
GO:0045084	positive regulation of interleukin-12 biosynthetic process	0.000162753
GO:0071376	cellular response to corticotropin-releasing hormone stimulus	0.000162753
GO:1900019	regulation of protein kinase C activity	0.000162753
GO:1900020	positive regulation of protein kinase C activity	0.000162753
GO:1904352	positive regulation of protein catabolic process in the vacuole	0.000162753
GO:0002792	negative regulation of peptide secretion	0.000163276
GO:0006140	regulation of nucleotide metabolic process	0.000169179
GO:0032024	positive regulation of insulin secretion	0.000170084
GO:0032673	regulation of interleukin-4 production	0.00017737
GO:0071216	cellular response to biotic stimulus	0.000183346
GO:0043900	regulation of multi-organism process	0.000187269
GO:0009896	positive regulation of catabolic process	0.000193885
GO:0002675	positive regulation of acute inflammatory response	0.000198075
GO:0033135	regulation of peptidyl-serine phosphorylation	0.000202925
GO:0000209	protein polyubiquitination	0.000209893
GO:0071322	cellular response to carbohydrate stimulus	0.000210188
GO:0001894	tissue homeostasis	0.000220064
GO:0032728	positive regulation of interferon-beta production	0.000220284
GO:0032892	positive regulation of organic acid transport	0.000220284
GO:0035774	positive regulation of insulin secretion involved in cellular response to glucose stimulus	0.000220284
GO:0045732	positive regulation of protein catabolic process	0.000225751
GO:0043161	proteasome-mediated ubiquitin-dependent protein catabolic process	0.000229917
GO:0046634	regulation of alpha-beta T cell activation	0.000235923
GO:0002697	regulation of immune effector process	0.000237745
GO:1903900	regulation of viral life cycle	0.000241245
GO:0045345	positive regulation of MHC class I biosynthetic process	0.000243485
GO:0097647	amylin receptor signaling pathway	0.000243485
GO:1905954	positive regulation of lipid localization	0.00024845
GO:1902749	regulation of cell cycle G2/M phase transition	0.000249669
GO:0071496	cellular response to external stimulus	0.000251635
GO:0014002	astrocyte development	0.000269404
GO:0034694	response to prostaglandin	0.000269404
GO:0061900	glial cell activation	0.000269404
GO:0006816	calcium ion transport	0.000271282
GO:0008202	steroid metabolic process	0.000272217
GO:0009743	response to carbohydrate	0.000275541
GO:0051090	regulation of DNA binding transcription factor activity	0.000284818
GO:0030802	regulation of cyclic nucleotide biosynthetic process	0.000288904
GO:0051384	response to glucocorticoid	0.000294232
GO:0002440	production of molecular mediator of immune response	0.000296293
GO:0043122	regulation of I-kappaB kinase/NF-kappaB signaling	0.000296293
GO:1901990	regulation of mitotic cell cycle phase transition	0.000298903
GO:0060070	canonical Wnt signaling pathway	0.000305617
GO:0002708	positive regulation of lymphocyte mediated immunity	0.00031837
GO:0050806	positive regulation of synaptic transmission	0.000323825
GO:0032633	interleukin-4 production	0.000325094
GO:0042311	vasodilation	0.000325094
GO:0043114	regulation of vascular permeability	0.000325094
GO:0071549	cellular response to dexamethasone stimulus	0.000325094
GO:0070542	response to fatty acid	0.000333883
GO:0002683	negative regulation of immune system process	0.000333997
GO:0000187	activation of MAPK activity	0.000334174
GO:0042090	interleukin-12 biosynthetic process	0.000339979
GO:0045075	regulation of interleukin-12 biosynthetic process	0.000339979
GO:0045341	MHC class I biosynthetic process	0.000339979
GO:0045343	regulation of MHC class I biosynthetic process	0.000339979
GO:0051458	corticotropin secretion	0.000339979
GO:0070459	prolactin secretion	0.000339979
GO:1905165	regulation of lysosomal protein catabolic process	0.000339979
GO:2001185	regulation of CD8-positive, alpha-beta T cell activation	0.000339979
GO:0030100	regulation of endocytosis	0.000341476
GO:0051924	regulation of calcium ion transport	0.000349505
GO:0046849	bone remodeling	0.000349931
GO:0046677	response to antibiotic	0.000361828
GO:0044070	regulation of anion transport	0.000366523
GO:0032147	activation of protein kinase activity	0.00037538
GO:0007190	activation of adenylate cyclase activity	0.000387709
GO:0034383	low-density lipoprotein particle clearance	0.000387709
GO:0030098	lymphocyte differentiation	0.000389337
GO:0007257	activation of JUN kinase activity	0.000421721
GO:0061756	leukocyte adhesion to vascular endothelial cell	0.000421721
GO:0043687	post-translational protein modification	0.000426983
GO:0048145	regulation of fibroblast proliferation	0.000438556
GO:0071248	cellular response to metal ion	0.000438984
GO:0002158	osteoclast proliferation	0.000452109
GO:0002483	antigen processing and presentation of endogenous peptide antigen	0.000452109
GO:0045080	positive regulation of chemokine biosynthetic process	0.000452109
GO:0097084	vascular smooth muscle cell development	0.000452109
GO:0048144	fibroblast proliferation	0.000458033
GO:0006869	lipid transport	0.000490532
GO:0031960	response to corticosteroid	0.0004928
GO:0003073	regulation of systemic arterial blood pressure	0.000498827
GO:0030111	regulation of Wnt signaling pathway	0.000499112
GO:0043405	regulation of MAP kinase activity	0.000499112
GO:0010498	proteasomal protein catabolic process	0.00050239
GO:1901987	regulation of cell cycle phase transition	0.00050975
GO:0070838	divalent metal ion transport	0.000540072
GO:0000086	G2/M transition of mitotic cell cycle	0.000543619
GO:0010948	negative regulation of cell cycle process	0.000553141
GO:0031623	receptor internalization	0.000564779
GO:0072511	divalent inorganic cation transport	0.000571843
GO:0045861	negative regulation of proteolysis	0.000572152
GO:0001993	regulation of systemic arterial blood pressure by norepinephrine-epinephrine	0.000579749
GO:0002024	diet induced thermogenesis	0.000579749
GO:0002634	regulation of germinal center formation	0.000579749
GO:0002676	regulation of chronic inflammatory response	0.000579749
GO:0034382	chylomicron remnant clearance	0.000579749
GO:0046598	positive regulation of viral entry into host cell	0.000579749
GO:0071830	triglyceride-rich lipoprotein particle clearance	0.000579749
GO:1904350	regulation of protein catabolic process in the vacuole	0.000579749
GO:2000849	regulation of glucocorticoid secretion	0.000579749
GO:0043123	positive regulation of I-kappaB kinase/NF-kappaB signaling	0.00059876
GO:0007249	I-kappaB kinase/NF-kappaB signaling	0.00061574
GO:0016101	diterpenoid metabolic process	0.000662061
GO:0030804	positive regulation of cyclic nucleotide biosynthetic process	0.000666285
GO:0050707	regulation of cytokine secretion	0.000684316
GO:0050796	regulation of insulin secretion	0.000684316
GO:0072507	divalent inorganic cation homeostasis	0.000685736
GO:0002437	inflammatory response to antigenic stimulus	0.000714169
GO:0071548	response to dexamethasone	0.000714169
GO:1904019	epithelial cell apoptotic process	0.000714905
GO:0002475	antigen processing and presentation via MHC class Ib	0.000722774
GO:0002863	positive regulation of inflammatory response to antigenic stimulus	0.000722774
GO:0002923	regulation of humoral immune response mediated by circulating immunoglobulin	0.000722774
GO:0032306	regulation of prostaglandin secretion	0.000722774
GO:0032308	positive regulation of prostaglandin secretion	0.000722774
GO:0035933	glucocorticoid secretion	0.000722774
GO:0060068	vagina development	0.000722774
GO:0071281	cellular response to iron ion	0.000722774
GO:1904996	positive regulation of leukocyte adhesion to vascular endothelial cell	0.000722774
GO:1905146	lysosomal protein catabolic process	0.000722774
GO:2001214	positive regulation of vasculogenesis	0.000722774
GO:0002699	positive regulation of immune effector process	0.000739862
GO:0002705	positive regulation of leukocyte mediated immunity	0.000742416
GO:0002685	regulation of leukocyte migration	0.000759106
GO:0045776	negative regulation of blood pressure	0.000764191
GO:0044839	cell cycle G2/M phase transition	0.000767089
GO:0008217	regulation of blood pressure	0.000778722
GO:0048863	stem cell differentiation	0.000782157
GO:0032648	regulation of interferon-beta production	0.000816391
GO:0008630	intrinsic apoptotic signaling pathway in response to DNA damage	0.00082944
GO:0060627	regulation of vesicle-mediated transport	0.000839267
GO:0071241	cellular response to inorganic substance	0.000839849
GO:0045744	negative regulation of G-protein coupled receptor protein signaling pathway	0.000870805
GO:0007494	midgut development	0.00088106
GO:0010820	positive regulation of T cell chemotaxis	0.00088106
GO:0019883	antigen processing and presentation of endogenous antigen	0.00088106
GO:0040015	negative regulation of multicellular organism growth	0.00088106
GO:0045073	regulation of chemokine biosynthetic process	0.00088106
GO:0060340	positive regulation of type I interferon-mediated signaling pathway	0.00088106
GO:1903531	negative regulation of secretion by cell	0.000904489
GO:0048511	rhythmic process	0.000911113
GO:0009409	response to cold	0.000927468
GO:0032608	interferon-beta production	0.000927468
GO:0030278	regulation of ossification	0.000949597
GO:0006694	steroid biosynthetic process	0.000972769
GO:0006953	acute-phase response	0.000986419
GO:0048260	positive regulation of receptor-mediated endocytosis	0.000986419
GO:0050433	regulation of catecholamine secretion	0.000986419
GO:0007565	female pregnancy	0.00099636
GO:0006721	terpenoid metabolic process	0.00102469
GO:0032368	regulation of lipid transport	0.00102469
GO:0010819	regulation of T cell chemotaxis	0.00105448
GO:0034116	positive regulation of heterotypic cell-cell adhesion	0.00105448
GO:0042033	chemokine biosynthetic process	0.00105448
GO:0045086	positive regulation of interleukin-2 biosynthetic process	0.00105448
GO:0050755	chemokine metabolic process	0.00105448
GO:0051798	positive regulation of hair follicle development	0.00105448
GO:0048545	response to steroid hormone	0.00105939
GO:0060249	anatomical structure homeostasis	0.00109117
GO:0032890	regulation of organic acid transport	0.00111132
GO:2000351	regulation of endothelial cell apoptotic process	0.00111132
GO:0002763	positive regulation of myeloid leukocyte differentiation	0.00117734
GO:0050432	catecholamine secretion	0.00117734
GO:0072678	T cell migration	0.00117734
GO:0009152	purine ribonucleotide biosynthetic process	0.00119657
GO:0007623	circadian rhythm	0.00120072
GO:0050663	cytokine secretion	0.00122829
GO:0050792	regulation of viral process	0.00122829
GO:0042742	defense response to bacterium	0.00123929
GO:0032310	prostaglandin secretion	0.00124292
GO:0042635	positive regulation of hair cycle	0.00124292
GO:0046717	acid secretion	0.00125021
GO:0006164	purine nucleotide biosynthetic process	0.00128317
GO:0046660	female sex differentiation	0.00129091
GO:0050715	positive regulation of cytokine secretion	0.00129091
GO:0048146	positive regulation of fibroblast proliferation	0.00131669
GO:0061178	regulation of insulin secretion involved in cellular response to glucose stimulus	0.00131669
GO:0007568	aging	0.00135121
GO:0030073	insulin secretion	0.00140368
GO:0022612	gland morphogenesis	0.00141856
GO:0007039	protein catabolic process in the vacuole	0.00144626
GO:0036037	CD8-positive, alpha-beta T cell activation	0.00144626
GO:0042159	lipoprotein catabolic process	0.00144626
GO:0097286	iron ion import	0.00144626
GO:1990845	adaptive thermogenesis	0.00144626
GO:2001212	regulation of vasculogenesis	0.00144626
GO:0050709	negative regulation of protein secretion	0.001463
GO:0032370	positive regulation of lipid transport	0.00146601
GO:0009260	ribonucleotide biosynthetic process	0.00149554
GO:0002637	regulation of immunoglobulin production	0.00154449
GO:0071333	cellular response to glucose stimulus	0.00155478
GO:0007584	response to nutrient	0.00156343
GO:0072522	purine-containing compound biosynthetic process	0.00157199
GO:0051048	negative regulation of secretion	0.00159692
GO:0046390	ribose phosphate biosynthetic process	0.00159812
GO:0002687	positive regulation of leukocyte migration	0.00160214
GO:0032479	regulation of type I interferon production	0.00160214
GO:0034381	plasma lipoprotein particle clearance	0.00162555
GO:1903902	positive regulation of viral life cycle	0.00162555
GO:0009612	response to mechanical stimulus	0.00163094
GO:0002706	regulation of lymphocyte mediated immunity	0.00165049
GO:0032606	type I interferon production	0.00165049
GO:0071331	cellular response to hexose stimulus	0.00165049
GO:0009615	response to virus	0.00165138
GO:0032102	negative regulation of response to external stimulus	0.00165138
GO:0001916	positive regulation of T cell mediated cytotoxicity	0.00166436
GO:0002031	G-protein coupled receptor internalization	0.00166436
GO:0002467	germinal center formation	0.00166436
GO:0002739	regulation of cytokine secretion involved in immune response	0.00166436
GO:0002922	positive regulation of humoral immune response	0.00166436
GO:0032305	positive regulation of icosanoid secretion	0.00166436
GO:0032736	positive regulation of interleukin-13 production	0.00166436
GO:0051044	positive regulation of membrane protein ectodomain proteolysis	0.00166436
GO:1902187	negative regulation of viral release from host cell	0.00166436
GO:2000846	regulation of corticosteroid hormone secretion	0.00166436
GO:0045444	fat cell differentiation	0.00166548
GO:0032355	response to estradiol	0.00169985
GO:0071326	cellular response to monosaccharide stimulus	0.00169985
GO:0002449	lymphocyte mediated immunity	0.00179044
GO:0001910	regulation of leukocyte mediated cytotoxicity	0.00179556
GO:0050710	negative regulation of cytokine secretion	0.00179556
GO:0048732	gland development	0.00182711
GO:0002526	acute inflammatory response	0.00184635
GO:0055074	calcium ion homeostasis	0.00185132
GO:0006720	isoprenoid metabolic process	0.00185409
GO:0019229	regulation of vasoconstriction	0.00188457
GO:0035773	insulin secretion involved in cellular response to glucose stimulus	0.00188457
GO:0007567	parturition	0.00189712
GO:0014061	regulation of norepinephrine secretion	0.00189712
GO:0015732	prostaglandin transport	0.00189712
GO:0035930	corticosteroid hormone secretion	0.00189712
GO:0045780	positive regulation of bone resorption	0.00189712
GO:0045986	negative regulation of smooth muscle contraction	0.00189712
GO:0046852	positive regulation of bone remodeling	0.00189712
GO:0140058	neuron projection arborization	0.00189712
GO:0140131	positive regulation of lymphocyte chemotaxis	0.00189712
GO:2000193	positive regulation of fatty acid transport	0.00189712
GO:0044706	multi-multicellular organism process	0.00196157
GO:0050728	negative regulation of inflammatory response	0.00196215
GO:0071385	cellular response to glucocorticoid stimulus	0.00197629
GO:0097191	extrinsic apoptotic signaling pathway	0.00200111
GO:0045471	response to ethanol	0.00201778
GO:0032303	regulation of icosanoid secretion	0.0021444
GO:0042753	positive regulation of circadian rhythm	0.0021444
GO:0048243	norepinephrine secretion	0.0021444
GO:0071380	cellular response to prostaglandin E stimulus	0.0021444
GO:0002260	lymphocyte homeostasis	0.00216797
GO:0032677	regulation of interleukin-8 production	0.00216797
GO:0030217	T cell differentiation	0.00225078
GO:0001678	cellular glucose homeostasis	0.00225124
GO:0002224	toll-like receptor signaling pathway	0.00225124
GO:0046686	response to cadmium ion	0.00226798
GO:0051937	catecholamine transport	0.00226798
GO:1902930	regulation of alcohol biosynthetic process	0.00226798
GO:0061035	regulation of cartilage development	0.00237082
GO:0071384	cellular response to corticosteroid stimulus	0.00237082
GO:0002374	cytokine secretion involved in immune response	0.0024061
GO:0030540	female genitalia development	0.0024061
GO:0043011	myeloid dendritic cell differentiation	0.0024061
GO:0045076	regulation of interleukin-2 biosynthetic process	0.0024061
GO:2000831	regulation of steroid hormone secretion	0.0024061
GO:0031331	positive regulation of cellular catabolic process	0.0024376
GO:0030879	mammary gland development	0.00243812
GO:0002718	regulation of cytokine production involved in immune response	0.0024765
GO:0046165	alcohol biosynthetic process	0.00256848
GO:0008277	regulation of G-protein coupled receptor protein signaling pathway	0.00263542
GO:0015711	organic anion transport	0.0026688
GO:0051051	negative regulation of transport	0.0026688
GO:0032331	negative regulation of chondrocyte differentiation	0.0026821
GO:0042953	lipoprotein transport	0.0026821
GO:0044872	lipoprotein localization	0.0026821
GO:0045187	regulation of circadian sleep/wake cycle, sleep	0.0026821
GO:0060749	mammary gland alveolus development	0.0026821
GO:0061377	mammary gland lobule development	0.0026821
GO:1905331	negative regulation of morphogenesis of an epithelium	0.0026821
GO:0030810	positive regulation of nucleotide biosynthetic process	0.00269652
GO:1900373	positive regulation of purine nucleotide biosynthetic process	0.00269652
GO:0048708	astrocyte differentiation	0.00281091
GO:0051966	regulation of synaptic transmission, glutamatergic	0.00281091
GO:0048872	homeostasis of number of cells	0.00286874
GO:0032637	interleukin-8 production	0.00292825
GO:0061180	mammary gland epithelium development	0.00292825
GO:1903524	positive regulation of blood circulation	0.00292825
GO:0032727	positive regulation of interferon-alpha production	0.00297227
GO:0035809	regulation of urine volume	0.00297227
GO:0042832	defense response to protozoan	0.00297227
GO:0051797	regulation of hair follicle development	0.00297227
GO:1901617	organic hydroxy compound biosynthetic process	0.0029737
GO:0002377	immunoglobulin production	0.00298819
GO:0031341	regulation of cell killing	0.00304856
GO:0001818	negative regulation of cytokine production	0.00324825
GO:0001562	response to protozoan	0.0032765
GO:0002021	response to dietary excess	0.0032765
GO:0002861	regulation of inflammatory response to antigenic stimulus	0.0032765
GO:0015874	norepinephrine transport	0.0032765
GO:0032656	regulation of interleukin-13 production	0.0032765
GO:0034114	regulation of heterotypic cell-cell adhesion	0.0032765
GO:0035929	steroid hormone secretion	0.0032765
GO:0042094	interleukin-2 biosynthetic process	0.0032765
GO:0042749	regulation of circadian sleep/wake cycle	0.0032765
GO:0046640	regulation of alpha-beta T cell proliferation	0.0032765
GO:1902932	positive regulation of alcohol biosynthetic process	0.0032765
GO:1904994	regulation of leukocyte adhesion to vascular endothelial cell	0.0032765
GO:0032481	positive regulation of type I interferon production	0.00329823
GO:0006836	neurotransmitter transport	0.00330528
GO:0002702	positive regulation of production of molecular mediator of immune response	0.00342762
GO:1900371	regulation of purine nucleotide biosynthetic process	0.00353452
GO:0015844	monoamine transport	0.00356009
GO:1901623	regulation of lymphocyte chemotaxis	0.00359467
GO:0010951	negative regulation of endopeptidase activity	0.00360134
GO:0030808	regulation of nucleotide biosynthetic process	0.00361774
GO:0042310	vasoconstriction	0.00369565
GO:1904035	regulation of epithelial cell apoptotic process	0.00369565
GO:2001236	regulation of extrinsic apoptotic signaling pathway	0.00370228
GO:0006520	cellular amino acid metabolic process	0.00382123
GO:0090066	regulation of anatomical structure size	0.00382477
GO:0051952	regulation of amine transport	0.00383432
GO:1902105	regulation of leukocyte differentiation	0.00391602
GO:0009165	nucleotide biosynthetic process	0.00392375
GO:0001914	regulation of T cell mediated cytotoxicity	0.00392667
GO:0002691	regulation of cellular extravasation	0.00392667
GO:0010818	T cell chemotaxis	0.00392667
GO:0032616	interleukin-13 production	0.00392667
GO:0042359	vitamin D metabolic process	0.00392667
GO:0048520	positive regulation of behavior	0.00392667
GO:0050802	circadian sleep/wake cycle, sleep	0.00392667
GO:0051043	regulation of membrane protein ectodomain proteolysis	0.00392667
GO:1903010	regulation of bone development	0.00392667
GO:2000191	regulation of fatty acid transport	0.00392667
GO:0048259	regulation of receptor-mediated endocytosis	0.00397614
GO:1901615	organic hydroxy compound metabolic process	0.00408687
GO:0071674	mononuclear cell migration	0.00412112
GO:1903901	negative regulation of viral life cycle	0.00412112
GO:1901293	nucleoside phosphate biosynthetic process	0.00413491
GO:0050878	regulation of body fluid levels	0.00417721
GO:0042063	gliogenesis	0.00418162
GO:0007202	activation of phospholipase C activity	0.00427239
GO:0034695	response to prostaglandin E	0.00427239
GO:0045672	positive regulation of osteoclast differentiation	0.00427239
GO:0046633	alpha-beta T cell proliferation	0.00427239
GO:0050901	leukocyte tethering or rolling	0.00427239
GO:0060444	branching involved in mammary gland duct morphogenesis	0.00427239
GO:0002285	lymphocyte activation involved in immune response	0.00433198
GO:0002456	T cell mediated immunity	0.00442064
GO:0010466	negative regulation of peptidase activity	0.00445988
GO:0022410	circadian sleep/wake cycle process	0.0046317
GO:0061037	negative regulation of cartilage development	0.0046317
GO:2000406	positive regulation of T cell migration	0.0046317
GO:2001233	regulation of apoptotic signaling pathway	0.00469968
GO:0042446	hormone biosynthetic process	0.00473305
GO:0030324	lung development	0.00482364
GO:0051224	negative regulation of protein transport	0.00482364
GO:0001776	leukocyte homeostasis	0.00489414
GO:0015837	amine transport	0.00489414
GO:0097756	negative regulation of blood vessel diameter	0.00489414
GO:0002703	regulation of leukocyte mediated immunity	0.00492628
GO:0001975	response to amphetamine	0.0050045
GO:0032647	regulation of interferon-alpha production	0.0050045
GO:0045932	negative regulation of muscle contraction	0.0050045
GO:0060571	morphogenesis of an epithelial fold	0.0050045
GO:0071880	adenylate cyclase-activating adrenergic receptor signaling pathway	0.0050045
GO:0048771	tissue remodeling	0.00503039
GO:0002367	cytokine production involved in immune response	0.0050585
GO:0030301	cholesterol transport	0.0050585
GO:0045778	positive regulation of ossification	0.0050585
GO:0060326	cell chemotaxis	0.00513395
GO:0051099	positive regulation of binding	0.00513596
GO:0048661	positive regulation of smooth muscle cell proliferation	0.00522617
GO:0019722	calcium-mediated signaling	0.00524301
GO:0030323	respiratory tube development	0.00524301
GO:1904950	negative regulation of establishment of protein localization	0.00524301
GO:0001773	myeloid dendritic cell activation	0.00539067
GO:0032607	interferon-alpha production	0.00539067
GO:0042026	protein refolding	0.00539067
GO:0042745	circadian sleep/wake cycle	0.00539067
GO:2001025	positive regulation of response to drug	0.00539067
GO:0001843	neural tube closure	0.00539716
GO:0006835	dicarboxylic acid transport	0.00539716
GO:0032092	positive regulation of protein binding	0.00539716
GO:0045639	positive regulation of myeloid cell differentiation	0.00539716
GO:0043062	extracellular structure organization	0.00545043
GO:0001942	hair follicle development	0.00557148
GO:0060606	tube closure	0.00557148
GO:0033598	mammary gland epithelial cell proliferation	0.0057901
GO:0042634	regulation of hair cycle	0.0057901
GO:0001909	leukocyte mediated cytotoxicity	0.0059302
GO:0022404	molting cycle process	0.0059302
GO:0022405	hair cycle process	0.0059302
GO:0033273	response to vitamin	0.0059302
GO:0051588	regulation of neurotransmitter transport	0.0059302
GO:0097006	regulation of plasma lipoprotein particle levels	0.0059302
GO:0098773	skin epidermis development	0.0059302
GO:0030316	osteoclast differentiation	0.00611464
GO:0046632	alpha-beta T cell differentiation	0.00611464
GO:0097327	response to antineoplastic agent	0.00611464
GO:2001023	regulation of response to drug	0.00611464
GO:0001782	B cell homeostasis	0.00620268
GO:0032743	positive regulation of interleukin-2 production	0.00620268
GO:0050690	regulation of defense response to virus by virus	0.00620268
GO:0051590	positive regulation of neurotransmitter transport	0.00620268
GO:0051968	positive regulation of synaptic transmission, glutamatergic	0.00620268
GO:0022406	membrane docking	0.00627453
GO:0015918	sterol transport	0.00630247
GO:0050830	defense response to Gram-positive bacterium	0.00630247
GO:2000379	positive regulation of reactive oxygen species metabolic process	0.00630247
GO:0002221	pattern recognition receptor signaling pathway	0.00639687
GO:0018105	peptidyl-serine phosphorylation	0.00641356
GO:0042100	B cell proliferation	0.00649373
GO:0001913	T cell mediated cytotoxicity	0.00662829
GO:0032733	positive regulation of interleukin-10 production	0.00662829
GO:0046596	regulation of viral entry into host cell	0.00662829
GO:0014020	primary neural tube formation	0.00668842
GO:0021782	glial cell development	0.00668842
GO:0072676	lymphocyte migration	0.00668842
GO:0051216	cartilage development	0.00677339
GO:0035249	synaptic transmission, glutamatergic	0.00688656
GO:0048525	negative regulation of viral process	0.00688656
GO:1990823	response to leukemia inhibitory factor	0.00688656
GO:1990830	cellular response to leukemia inhibitory factor	0.00688656
GO:0061138	morphogenesis of a branching epithelium	0.0069021
GO:0035886	vascular smooth muscle cell differentiation	0.00706684
GO:1902186	regulation of viral release from host cell	0.00706684
GO:2000352	negative regulation of endothelial cell apoptotic process	0.00706684
GO:2000403	positive regulation of lymphocyte migration	0.00706684
GO:0007204	positive regulation of cytosolic calcium ion concentration	0.00708147
GO:0002286	T cell activation involved in immune response	0.00708817
GO:0006874	cellular calcium ion homeostasis	0.0072926
GO:0048640	negative regulation of developmental growth	0.00729326
GO:0009749	response to glucose	0.00743311
GO:0015696	ammonium transport	0.00750184
GO:0042752	regulation of circadian rhythm	0.00750184
GO:0002711	positive regulation of T cell mediated immunity	0.0075182
GO:0002714	positive regulation of B cell mediated immunity	0.0075182
GO:0002891	positive regulation of immunoglobulin mediated immune response	0.0075182
GO:0042755	eating behavior	0.0075182
GO:0060603	mammary gland duct morphogenesis	0.0075182
GO:0071875	adrenergic receptor signaling pathway	0.0075182
GO:0090322	regulation of superoxide metabolic process	0.0075182
GO:0030282	bone mineralization	0.00792955
GO:0001963	synaptic transmission, dopaminergic	0.00798227
GO:0010039	response to iron ion	0.00798227
GO:0010863	positive regulation of phospholipase C activity	0.00798227
GO:0045907	positive regulation of vasoconstriction	0.00798227
GO:0071312	cellular response to alkaloid	0.00798227
GO:2000404	regulation of T cell migration	0.00798227
GO:0009746	response to hexose	0.00799046
GO:0060541	respiratory system development	0.00799046
GO:0048608	reproductive structure development	0.00814312
GO:0015893	drug transport	0.00827917
GO:0001841	neural tube formation	0.0083714
GO:0071887	leukocyte apoptotic process	0.0083714
GO:0061458	reproductive system development	0.00841169
GO:0001505	regulation of neurotransmitter levels	0.00844875
GO:0007435	salivary gland morphogenesis	0.00845894
GO:0030431	sleep	0.00845894
GO:0043243	positive regulation of protein complex disassembly	0.00845894
GO:0015849	organic acid transport	0.00856099
GO:0046942	carboxylic acid transport	0.00856099
GO:0048524	positive regulation of viral process	0.00859766
GO:0071214	cellular response to abiotic stimulus	0.00867426
GO:0104004	cellular response to environmental stimulus	0.00867426
GO:0001763	morphogenesis of a branching structure	0.00872497
GO:0034284	response to monosaccharide	0.00872497
GO:0019076	viral release from host cell	0.00894811
GO:0030501	positive regulation of bone mineralization	0.00894811
GO:0035890	exit from host	0.00894811
GO:0035891	exit from host cell	0.00894811
GO:0052126	movement in host environment	0.00894811
GO:0052192	movement in environment of other organism involved in symbiotic interaction	0.00894811
GO:1900274	regulation of phospholipase C activity	0.00894811
GO:0002698	negative regulation of immune effector process	0.0090609
GO:0014013	regulation of gliogenesis	0.0090609
GO:0009314	response to radiation	0.00925576
GO:0030595	leukocyte chemotaxis	0.00934345
GO:0060562	epithelial tube morphogenesis	0.00937584
GO:0002720	positive regulation of cytokine production involved in immune response	0.00944966
GO:0033280	response to vitamin D	0.00944966
GO:0045684	positive regulation of epidermis development	0.00944966
GO:0019218	regulation of steroid metabolic process	0.00978278
GO:0043279	response to alkaloid	0.00978278
GO:0001912	positive regulation of leukocyte mediated cytotoxicity	0.0099635
GO:0032715	negative regulation of interleukin-6 production	0.0099635
GO:0045124	regulation of bone resorption	0.0099635
GO:0043393	regulation of protein binding	0.0099899
GO:0043200	response to amino acid	0.0100307
GO:0018209	peptidyl-serine modification	0.0101158
GO:0006066	alcohol metabolic process	0.0103711
GO:0007431	salivary gland development	0.0104895
GO:0014075	response to amine	0.0104895
GO:0050706	regulation of interleukin-1 beta secretion	0.0104895
GO:0050873	brown fat cell differentiation	0.0104895
GO:0051480	regulation of cytosolic calcium ion concentration	0.0105004
GO:0032675	regulation of interleukin-6 production	0.0105373
GO:0051346	negative regulation of hydrolase activity	0.0106873
GO:0072503	cellular divalent inorganic cation homeostasis	0.0107952
GO:0042303	molting cycle	0.0107961
GO:0042633	hair cycle	0.0107961
GO:0015682	ferric iron transport	0.0110276
GO:0061028	establishment of endothelial barrier	0.0110276
GO:0072512	trivalent inorganic cation transport	0.0110276
GO:0006909	phagocytosis	0.0111636
GO:0002761	regulation of myeloid leukocyte differentiation	0.0113248
GO:0008406	gonad development	0.0115491
GO:0043030	regulation of macrophage activation	0.0115776
GO:0070169	positive regulation of biomineral tissue development	0.0115776
GO:0097028	dendritic cell differentiation	0.0115776
GO:0050804	modulation of chemical synaptic transmission	0.011855
GO:0099177	regulation of trans-synaptic signaling	0.011855
GO:0033500	carbohydrate homeostasis	0.0121017
GO:0042593	glucose homeostasis	0.0121017
GO:0045746	negative regulation of Notch signaling pathway	0.0121395
GO:0097300	programmed necrotic cell death	0.0121395
GO:1904036	negative regulation of epithelial cell apoptotic process	0.0121395
GO:0042445	hormone metabolic process	0.0122896
GO:0035690	cellular response to drug	0.0125751
GO:0045137	development of primary sexual characteristics	0.0126711
GO:0006509	membrane protein ectodomain proteolysis	0.0127132
GO:0014047	glutamate secretion	0.0127132
GO:0030890	positive regulation of B cell proliferation	0.0127132
GO:0032309	icosanoid secretion	0.0127132
GO:0045429	positive regulation of nitric oxide biosynthetic process	0.0127132
GO:1900449	regulation of glutamate receptor signaling pathway	0.0127132
GO:1904407	positive regulation of nitric oxide metabolic process	0.0127132
GO:0030198	extracellular matrix organization	0.0127226
GO:0032635	interleukin-6 production	0.0129995
GO:0051607	defense response to virus	0.0132574
GO:0051592	response to calcium ion	0.0132917
GO:0010883	regulation of lipid storage	0.0132985
GO:0034105	positive regulation of tissue remodeling	0.0132985
GO:0042771	intrinsic apoptotic signaling pathway in response to DNA damage by p53 class mediator	0.0132985
GO:0090278	negative regulation of peptide hormone secretion	0.0132985
GO:1901224	positive regulation of NIK/NF-kappaB signaling	0.0132985
GO:0001838	embryonic epithelial tube formation	0.0135876
GO:0006775	fat-soluble vitamin metabolic process	0.0138954
GO:0032653	regulation of interleukin-10 production	0.0138954
GO:0044060	regulation of endocrine process	0.0138954
GO:0048512	circadian behavior	0.0138954
GO:0050702	interleukin-1 beta secretion	0.0138954
GO:0050704	regulation of interleukin-1 secretion	0.0138954
GO:0051098	regulation of binding	0.0139453
GO:0043312	neutrophil degranulation	0.0141429
GO:0030335	positive regulation of cell migration	0.0142745
GO:0007622	rhythmic behavior	0.0145037
GO:0032570	response to progesterone	0.0145037
GO:0032757	positive regulation of interleukin-8 production	0.0145037
GO:0044764	multi-organism cellular process	0.0145037
GO:0045058	T cell selection	0.0145037
GO:0046850	regulation of bone remodeling	0.0145037
GO:0071715	icosanoid transport	0.0145037
GO:0097366	response to bronchodilator	0.0145037
GO:1901571	fatty acid derivative transport	0.0145037
GO:0002283	neutrophil activation involved in immune response	0.0145402
GO:0040013	negative regulation of locomotion	0.0145854
GO:1901652	response to peptide	0.0149453
GO:0001961	positive regulation of cytokine-mediated signaling pathway	0.0151234
GO:0002712	regulation of B cell mediated immunity	0.0151234
GO:0002889	regulation of immunoglobulin mediated immune response	0.0151234
GO:0031343	positive regulation of cell killing	0.0151234
GO:0032613	interleukin-10 production	0.0151234
GO:0048806	genitalia development	0.0151234
GO:0060443	mammary gland morphogenesis	0.0151234
GO:0001501	skeletal system development	0.0152197
GO:0032412	regulation of ion transmembrane transporter activity	0.0153359

## Sheet: Table S02-4
ID	Description	P_value
GO:0051249	regulation of lymphocyte activation	7.08572e-13
GO:0042110	T cell activation	8.3599e-13
GO:0060337	type I interferon signaling pathway	3.79094e-12
GO:0071357	cellular response to type I interferon	3.79094e-12
GO:0034340	response to type I interferon	5.93741e-12
GO:0051251	positive regulation of lymphocyte activation	6.69605e-12
GO:0050863	regulation of T cell activation	8.21081e-12
GO:0038110	interleukin-2-mediated signaling pathway	1.30437e-11
GO:0071352	cellular response to interleukin-2	2.1168e-11
GO:0002696	positive regulation of leukocyte activation	2.15074e-11
GO:0050867	positive regulation of cell activation	3.0862e-11
GO:0070669	response to interleukin-2	3.28845e-11
GO:0031295	T cell costimulation	8.86492e-11
GO:0031294	lymphocyte costimulation	9.72634e-11
GO:0050870	positive regulation of T cell activation	1.3734e-10
GO:1903039	positive regulation of leukocyte cell-cell adhesion	2.14988e-10
GO:0030168	platelet activation	3.95728e-10
GO:0071887	leukocyte apoptotic process	6.59096e-10
GO:0022409	positive regulation of cell-cell adhesion	7.26182e-10
GO:0018108	peptidyl-tyrosine phosphorylation	1.10213e-09
GO:0018212	peptidyl-tyrosine modification	1.18937e-09
GO:0045785	positive regulation of cell adhesion	1.52629e-09
GO:0050670	regulation of lymphocyte proliferation	2.67288e-09
GO:0032944	regulation of mononuclear cell proliferation	2.77957e-09
GO:0032945	negative regulation of mononuclear cell proliferation	2.91051e-09
GO:0050672	negative regulation of lymphocyte proliferation	2.91051e-09
GO:1903037	regulation of leukocyte cell-cell adhesion	2.99758e-09
GO:0070663	regulation of leukocyte proliferation	4.0668e-09
GO:0070664	negative regulation of leukocyte proliferation	4.11136e-09
GO:0007159	leukocyte cell-cell adhesion	7.4052e-09
GO:0001776	leukocyte homeostasis	9.67632e-09
GO:0048872	homeostasis of number of cells	1.00752e-08
GO:0002768	immune response-regulating cell surface receptor signaling pathway	1.10538e-08
GO:0002521	leukocyte differentiation	1.12738e-08
GO:0046651	lymphocyte proliferation	2.00768e-08
GO:0032943	mononuclear cell proliferation	2.13097e-08
GO:0022407	regulation of cell-cell adhesion	2.63945e-08
GO:0070661	leukocyte proliferation	3.37607e-08
GO:0050852	T cell receptor signaling pathway	7.17944e-08
GO:0002429	immune response-activating cell surface receptor signaling pathway	9.39849e-08
GO:1903706	regulation of hemopoiesis	9.39849e-08
GO:0030098	lymphocyte differentiation	1.26596e-07
GO:0051250	negative regulation of lymphocyte activation	1.46323e-07
GO:0007596	blood coagulation	1.62728e-07
GO:0043405	regulation of MAP kinase activity	1.74e-07
GO:0007599	hemostasis	1.81882e-07
GO:0070227	lymphocyte apoptotic process	1.846e-07
GO:0050817	coagulation	1.85937e-07
GO:2000108	positive regulation of leukocyte apoptotic process	2.00694e-07
GO:0071902	positive regulation of protein serine/threonine kinase activity	2.21273e-07
GO:0042129	regulation of T cell proliferation	2.99952e-07
GO:0002695	negative regulation of leukocyte activation	3.64464e-07
GO:1902105	regulation of leukocyte differentiation	3.84728e-07
GO:0045619	regulation of lymphocyte differentiation	3.9327e-07
GO:2000106	regulation of leukocyte apoptotic process	4.62224e-07
GO:0043406	positive regulation of MAP kinase activity	5.23922e-07
GO:0038179	neurotrophin signaling pathway	6.39751e-07
GO:0050866	negative regulation of cell activation	7.22263e-07
GO:0050851	antigen receptor-mediated signaling pathway	7.37698e-07
GO:0042098	T cell proliferation	7.47073e-07
GO:0046006	regulation of activated T cell proliferation	7.94639e-07
GO:0050868	negative regulation of T cell activation	1.10359e-06
GO:0050798	activated T cell proliferation	1.18603e-06
GO:0070372	regulation of ERK1 and ERK2 cascade	1.41949e-06
GO:0035723	interleukin-15-mediated signaling pathway	1.68063e-06
GO:0071350	cellular response to interleukin-15	1.68063e-06
GO:0010828	positive regulation of glucose transmembrane transport	1.85775e-06
GO:0060324	face development	1.85775e-06
GO:0070231	T cell apoptotic process	1.85775e-06
GO:1903038	negative regulation of leukocyte cell-cell adhesion	1.93547e-06
GO:0032147	activation of protein kinase activity	2.02236e-06
GO:0070371	ERK1 and ERK2 cascade	2.02236e-06
GO:0070672	response to interleukin-15	2.13625e-06
GO:0050878	regulation of body fluid levels	2.87049e-06
GO:0042130	negative regulation of T cell proliferation	3.22638e-06
GO:0030217	T cell differentiation	3.33139e-06
GO:0050671	positive regulation of lymphocyte proliferation	4.34597e-06
GO:0032946	positive regulation of mononuclear cell proliferation	4.50976e-06
GO:0002260	lymphocyte homeostasis	5.57604e-06
GO:0070665	positive regulation of leukocyte proliferation	5.79665e-06
GO:0030099	myeloid cell differentiation	6.76976e-06
GO:0007162	negative regulation of cell adhesion	6.83988e-06
GO:0022408	negative regulation of cell-cell adhesion	1.07739e-05
GO:0002683	negative regulation of immune system process	1.12613e-05
GO:0010827	regulation of glucose transmembrane transport	1.30921e-05
GO:0030878	thyroid gland development	1.33103e-05
GO:0046427	positive regulation of JAK-STAT cascade	1.4478e-05
GO:0048011	neurotrophin TRK receptor signaling pathway	1.50273e-05
GO:1904894	positive regulation of STAT cascade	1.59691e-05
GO:0050900	leukocyte migration	2.12552e-05
GO:0030851	granulocyte differentiation	2.33464e-05
GO:0032649	regulation of interferon-gamma production	2.41148e-05
GO:0042102	positive regulation of T cell proliferation	2.97768e-05
GO:0038113	interleukin-9-mediated signaling pathway	3.37695e-05
GO:0071355	cellular response to interleukin-9	3.37695e-05
GO:0032609	interferon-gamma production	3.77924e-05
GO:1904659	glucose transmembrane transport	4.72853e-05
GO:0033029	regulation of neutrophil apoptotic process	5.0595e-05
GO:0060368	regulation of Fc receptor mediated stimulatory signaling pathway	5.0595e-05
GO:0071104	response to interleukin-9	5.0595e-05
GO:0043029	T cell homeostasis	5.19533e-05
GO:0008645	hexose transmembrane transport	5.84149e-05
GO:0015749	monosaccharide transmembrane transport	6.25168e-05
GO:0034219	carbohydrate transmembrane transport	6.90587e-05
GO:0046326	positive regulation of glucose import	6.97995e-05
GO:0001781	neutrophil apoptotic process	7.07501e-05
GO:0030223	neutrophil differentiation	7.07501e-05
GO:0050730	regulation of peptidyl-tyrosine phosphorylation	7.30073e-05
GO:0070374	positive regulation of ERK1 and ERK2 cascade	7.59658e-05
GO:0048538	thymus development	8.00531e-05
GO:0035270	endocrine system development	8.36216e-05
GO:0001818	negative regulation of cytokine production	8.53994e-05
GO:0060338	regulation of type I interferon-mediated signaling pathway	9.12445e-05
GO:0045580	regulation of T cell differentiation	9.16862e-05
GO:0033034	positive regulation of myeloid cell apoptotic process	9.42231e-05
GO:0038114	interleukin-21-mediated signaling pathway	9.42231e-05
GO:0060020	Bergmann glial cell differentiation	9.42231e-05
GO:0098756	response to interleukin-21	9.42231e-05
GO:0098757	cellular response to interleukin-21	9.42231e-05
GO:0014065	phosphatidylinositol 3-kinase signaling	9.73678e-05
GO:0007173	epidermal growth factor receptor signaling pathway	0.000103301
GO:1902107	positive regulation of leukocyte differentiation	0.000106365
GO:0036092	phosphatidylinositol-3-phosphate biosynthetic process	0.000109872
GO:1990090	cellular response to nerve growth factor stimulus	0.000109872
GO:0006924	activation-induced cell death of T cells	0.000121002
GO:0097011	cellular response to granulocyte macrophage colony-stimulating factor stimulus	0.000121002
GO:0097012	response to granulocyte macrophage colony-stimulating factor	0.000121002
GO:0043434	response to peptide hormone	0.00012305
GO:1990089	response to nerve growth factor	0.000130819
GO:0050777	negative regulation of immune response	0.000133301
GO:0042113	B cell activation	0.000141956
GO:0070228	regulation of lymphocyte apoptotic process	0.000146133
GO:0070527	platelet aggregation	0.000146133
GO:0006661	phosphatidylinositol biosynthetic process	0.000148479
GO:0045955	negative regulation of calcium ion-dependent exocytosis	0.000151076
GO:0000186	activation of MAPKK activity	0.000154208
GO:0008643	carbohydrate transport	0.00015652
GO:0030258	lipid modification	0.000165164
GO:0007409	axonogenesis	0.00017604
GO:0046007	negative regulation of activated T cell proliferation	0.000184432
GO:0046929	negative regulation of neurotransmitter secretion	0.000184432
GO:0051024	positive regulation of immunoglobulin secretion	0.000184432
GO:0071803	positive regulation of podosome assembly	0.000184432
GO:0038127	ERBB signaling pathway	0.000187158
GO:0046425	regulation of JAK-STAT cascade	0.000187158
GO:1904892	regulation of STAT cascade	0.000196654
GO:0030888	regulation of B cell proliferation	0.000198944
GO:0048015	phosphatidylinositol-mediated signaling	0.000206494
GO:0050864	regulation of B cell activation	0.000206494
GO:0045779	negative regulation of bone resorption	0.00022106
GO:0048017	inositol lipid-mediated signaling	0.000221913
GO:0046324	regulation of glucose import	0.000251346
GO:1901652	response to peptide	0.000262545
GO:0042531	positive regulation of tyrosine phosphorylation of STAT protein	0.000262794
GO:1903708	positive regulation of hemopoiesis	0.000273156
GO:0061564	axon development	0.000280261
GO:0001959	regulation of cytokine-mediated signaling pathway	0.000285607
GO:0007259	JAK-STAT cascade	0.000298461
GO:0071222	cellular response to lipopolysaccharide	0.000298461
GO:0038034	signal transduction in absence of ligand	0.000299145
GO:0097192	extrinsic apoptotic signaling pathway in absence of ligand	0.000299145
GO:0001780	neutrophil homeostasis	0.000304082
GO:0046851	negative regulation of bone remodeling	0.000304082
GO:0070234	positive regulation of T cell apoptotic process	0.000304082
GO:0097696	STAT cascade	0.000311726
GO:0050731	positive regulation of peptidyl-tyrosine phosphorylation	0.000332411
GO:0060759	regulation of response to cytokine stimulus	0.00033952
GO:0030852	regulation of granulocyte differentiation	0.000350454
GO:0071801	regulation of podosome assembly	0.000350454
GO:0034109	homotypic cell-cell adhesion	0.000352454
GO:0071219	cellular response to molecule of bacterial origin	0.000354064
GO:0034764	positive regulation of transmembrane transport	0.000392373
GO:0042509	regulation of tyrosine phosphorylation of STAT protein	0.000396209
GO:0002643	regulation of tolerance induction	0.00040005
GO:0035855	megakaryocyte development	0.00040005
GO:0002573	myeloid leukocyte differentiation	0.000425089
GO:0046323	glucose import	0.000427235
GO:0007260	tyrosine phosphorylation of STAT protein	0.000443316
GO:0032693	negative regulation of interleukin-10 production	0.00045286
GO:0051023	regulation of immunoglobulin secretion	0.00045286
GO:0070102	interleukin-6-mediated signaling pathway	0.00045286
GO:0010001	glial cell differentiation	0.000477762
GO:0070230	positive regulation of lymphocyte apoptotic process	0.000508872
GO:0045621	positive regulation of lymphocyte differentiation	0.000511522
GO:0034103	regulation of tissue remodeling	0.000529562
GO:0071216	cellular response to biotic stimulus	0.000544923
GO:0030220	platelet formation	0.000568075
GO:0034104	negative regulation of tissue remodeling	0.000568075
GO:0001892	embryonic placenta development	0.000605793
GO:0006925	inflammatory cell apoptotic process	0.000630456
GO:0021697	cerebellar cortex formation	0.000630456
GO:0036344	platelet morphogenesis	0.000630456
GO:0048305	immunoglobulin secretion	0.000630456
GO:0051589	negative regulation of neurotransmitter transport	0.000630456
GO:0030219	megakaryocyte differentiation	0.000688711
GO:0042100	B cell proliferation	0.000688711
GO:1903306	negative regulation of regulated secretory pathway	0.000696006
GO:0033500	carbohydrate homeostasis	0.000699019
GO:0042593	glucose homeostasis	0.000699019
GO:0051896	regulation of protein kinase B signaling	0.000699019
GO:0097191	extrinsic apoptotic signaling pathway	0.00071109
GO:0051054	positive regulation of DNA metabolic process	0.000723309
GO:0046488	phosphatidylinositol metabolic process	0.000735676
GO:0032386	regulation of intracellular transport	0.00077446
GO:0033138	positive regulation of peptidyl-serine phosphorylation	0.000850596
GO:0002697	regulation of immune effector process	0.00086656
GO:0046854	phosphatidylinositol phosphorylation	0.000900907
GO:0002507	tolerance induction	0.000911548
GO:0071800	podosome assembly	0.000911548
GO:2001237	negative regulation of extrinsic apoptotic signaling pathway	0.000926756
GO:0002698	negative regulation of immune effector process	0.000979858
GO:0048679	regulation of axon regeneration	0.000989655
GO:2000300	regulation of synaptic vesicle exocytosis	0.000989655
GO:0046474	glycerophospholipid biosynthetic process	0.00104733
GO:0045637	regulation of myeloid cell differentiation	0.00106339
GO:0042104	positive regulation of activated T cell proliferation	0.00107087
GO:0050708	regulation of protein secretion	0.00108643
GO:0038093	Fc receptor signaling pathway	0.00109603
GO:0007411	axon guidance	0.00112936
GO:0048732	gland development	0.00113262
GO:0097485	neuron projection guidance	0.00116341
GO:0043491	protein kinase B signaling	0.00119817
GO:0032868	response to insulin	0.00123366
GO:0033032	regulation of myeloid cell apoptotic process	0.0012426
GO:0045577	regulation of B cell differentiation	0.0012426
GO:1902803	regulation of synaptic vesicle transport	0.0012426
GO:0046834	lipid phosphorylation	0.00124263
GO:0045589	regulation of regulatory T cell differentiation	0.00133309
GO:0045920	negative regulation of exocytosis	0.00133309
GO:0070570	regulation of neuron projection regeneration	0.00133309
GO:0010976	positive regulation of neuron projection development	0.00134454
GO:0042063	gliogenesis	0.00134454
GO:0010975	regulation of neuron projection development	0.00138589
GO:0050871	positive regulation of B cell activation	0.00140604
GO:0021696	cerebellar cortex morphogenesis	0.00142664
GO:0032689	negative regulation of interferon-gamma production	0.00142664
GO:0038111	interleukin-7-mediated signaling pathway	0.00142664
GO:0002791	regulation of peptide secretion	0.00145529
GO:0045066	regulatory T cell differentiation	0.00152325
GO:0098760	response to interleukin-7	0.00152325
GO:0098761	cellular response to interleukin-7	0.00152325
GO:0051051	negative regulation of transport	0.00152723
GO:0045017	glycerolipid biosynthetic process	0.00158696
GO:0010762	regulation of fibroblast migration	0.0016229
GO:0033028	myeloid cell apoptotic process	0.0016229
GO:0071354	cellular response to interleukin-6	0.0016229
GO:0030224	monocyte differentiation	0.00172559
GO:0060674	placenta blood vessel development	0.00172559
GO:1903131	mononuclear cell differentiation	0.00172559
GO:0070232	regulation of T cell apoptotic process	0.0018313
GO:1901099	negative regulation of signal transduction in absence of ligand	0.0018313
GO:2001240	negative regulation of extrinsic apoptotic signaling pathway in absence of ligand	0.0018313
GO:0033135	regulation of peptidyl-serine phosphorylation	0.00189237
GO:0008654	phospholipid biosynthetic process	0.00193099
GO:0002823	negative regulation of adaptive immune response based on somatic recombination of immune receptors built from immunoglobulin superfamily domains	0.00194002
GO:0032369	negative regulation of lipid transport	0.00194002
GO:0098751	bone cell development	0.00194002
GO:0060627	regulation of vesicle-mediated transport	0.0020155
GO:0060323	head morphogenesis	0.00205174
GO:0070741	response to interleukin-6	0.00205174
GO:0002431	Fc receptor mediated stimulatory signaling pathway	0.00210405
GO:0021587	cerebellum morphogenesis	0.00216646
GO:0032715	negative regulation of interleukin-6 production	0.00216646
GO:0034405	response to fluid shear stress	0.00216646
GO:0045124	regulation of bone resorption	0.00216646
GO:0045742	positive regulation of epidermal growth factor receptor signaling pathway	0.00216646
GO:0002262	myeloid cell homeostasis	0.00219269
GO:0002639	positive regulation of immunoglobulin production	0.00228415
GO:0002820	negative regulation of adaptive immune response	0.00228415
GO:1901186	positive regulation of ERBB signaling pathway	0.00240481
GO:0033628	regulation of cell adhesion mediated by integrin	0.00252842
GO:0046825	regulation of protein export from nucleus	0.00252842
GO:0071364	cellular response to epidermal growth factor stimulus	0.00252842
GO:0000187	activation of MAPK activity	0.00257036
GO:0071375	cellular response to peptide hormone stimulus	0.00261439
GO:0021575	hindbrain morphogenesis	0.00265498
GO:0001890	placenta development	0.00272172
GO:0010761	fibroblast migration	0.00278448
GO:0030890	positive regulation of B cell proliferation	0.00278448
GO:0002437	inflammatory response to antigenic stimulus	0.00291691
GO:0098693	regulation of synaptic vesicle cycle	0.00291691
GO:2001236	regulation of extrinsic apoptotic signaling pathway	0.00298604
GO:0032653	regulation of interleukin-10 production	0.00305224
GO:0070849	response to epidermal growth factor	0.00305224
GO:0032496	response to lipopolysaccharide	0.00309593
GO:0051897	positive regulation of protein kinase B signaling	0.00309605
GO:0031103	axon regeneration	0.00319049
GO:0046850	regulation of bone remodeling	0.00319049
GO:0002712	regulation of B cell mediated immunity	0.00333162
GO:0002889	regulation of immunoglobulin mediated immune response	0.00333162
GO:0032613	interleukin-10 production	0.00333162
GO:2001239	regulation of extrinsic apoptotic signaling pathway in absence of ligand	0.00333162
GO:0048871	multicellular organismal homeostasis	0.00337613
GO:0021695	cerebellar cortex development	0.00347564
GO:0060711	labyrinthine layer development	0.00362253
GO:1905953	negative regulation of lipid localization	0.00362253
GO:0045666	positive regulation of neuron differentiation	0.00367322
GO:0002237	response to molecule of bacterial origin	0.00375019
GO:0010171	body morphogenesis	0.00377228
GO:0048771	tissue remodeling	0.00380857
GO:0043901	negative regulation of multi-organism process	0.00400104
GO:0043409	negative regulation of MAPK cascade	0.00406649
GO:0031346	positive regulation of cell projection organization	0.00406908
GO:1901653	cellular response to peptide	0.00406908
GO:0002699	positive regulation of immune effector process	0.00419936
GO:0038083	peptidyl-tyrosine autophosphorylation	0.00439967
GO:1903532	positive regulation of secretion by cell	0.00440596
GO:0006650	glycerophospholipid metabolic process	0.00444936
GO:0038095	Fc-epsilon receptor signaling pathway	0.00447298
GO:0045071	negative regulation of viral genome replication	0.00473027
GO:0046928	regulation of neurotransmitter secretion	0.00473027
GO:1903531	negative regulation of secretion by cell	0.00475721
GO:0002637	regulation of immunoglobulin production	0.00489975
GO:0031102	neuron projection regeneration	0.00489975
GO:0033627	cell adhesion mediated by integrin	0.00489975
GO:0045740	positive regulation of DNA replication	0.00489975
GO:0002244	hematopoietic progenitor cell differentiation	0.00497743
GO:0031099	regeneration	0.00497743
GO:0045453	bone resorption	0.00507201
GO:0045576	mast cell activation	0.00507201
GO:0009749	response to glucose	0.00520373
GO:0032387	negative regulation of intracellular transport	0.00542483
GO:0009746	response to hexose	0.00551503
GO:0051047	positive regulation of secretion	0.00568186
GO:0016064	immunoglobulin mediated immune response	0.00583735
GO:0019724	B cell mediated immunity	0.00591966
GO:0034284	response to monosaccharide	0.00591966
GO:0032869	cellular response to insulin stimulus	0.00617079
GO:0030073	insulin secretion	0.0062559
GO:0051052	regulation of DNA metabolic process	0.00626598
GO:0043367	CD4-positive, alpha-beta T cell differentiation	0.00635475
GO:0031397	negative regulation of protein ubiquitination	0.00654886
GO:1902117	positive regulation of organelle assembly	0.00674566
GO:0051048	negative regulation of secretion	0.00678139
GO:0009612	response to mechanical stimulus	0.00687146
GO:0001819	positive regulation of cytokine production	0.00694762
GO:0001894	tissue homeostasis	0.00705373
GO:0052548	regulation of endopeptidase activity	0.00712544
GO:1903320	regulation of protein modification by small protein conjugation or removal	0.00714594
GO:0048678	response to axon injury	0.00714727
GO:0061515	myeloid cell development	0.00714727
GO:2001234	negative regulation of apoptotic signaling pathway	0.00723887
GO:0048708	astrocyte differentiation	0.00735206
GO:1904018	positive regulation of vasculature development	0.00742689
GO:0043281	regulation of cysteine-type endopeptidase activity involved in apoptotic process	0.00752199
GO:0009743	response to carbohydrate	0.00790961
GO:0045088	regulation of innate immune response	0.007931
GO:0048568	embryonic organ development	0.00799536
GO:0048608	reproductive structure development	0.00812511
GO:0050769	positive regulation of neurogenesis	0.00812511
GO:0035019	somatic stem cell population maintenance	0.00819759
GO:0035710	CD4-positive, alpha-beta T cell activation	0.00819759
GO:0045582	positive regulation of T cell differentiation	0.00819759
GO:0050805	negative regulation of synaptic transmission	0.00819759
GO:0051607	defense response to virus	0.00830889
GO:0061458	reproductive system development	0.00832233
GO:0002702	positive regulation of production of molecular mediator of immune response	0.00841551
GO:0050764	regulation of phagocytosis	0.00841551
GO:0001933	negative regulation of protein phosphorylation	0.00845555
GO:0023061	signal release	0.00845555
GO:0030101	natural killer cell activation	0.00863602
GO:0030100	regulation of endocytosis	0.00882451
GO:0017158	regulation of calcium ion-dependent exocytosis	0.00885913
GO:0043254	regulation of protein complex assembly	0.00886367
GO:0052547	regulation of peptidase activity	0.00886367
GO:1903321	negative regulation of protein modification by small protein conjugation or removal	0.0090848
GO:0002318	myeloid progenitor cell differentiation	0.00931302
GO:0015911	plasma membrane long-chain fatty acid transport	0.00931302
GO:0030222	eosinophil differentiation	0.00931302
GO:0031999	negative regulation of fatty acid beta-oxidation	0.00931302
GO:0032077	positive regulation of deoxyribonuclease activity	0.00931302
GO:0032747	positive regulation of interleukin-23 production	0.00931302
GO:0036146	cellular response to mycotoxin	0.00931302
GO:0043400	cortisol secretion	0.00931302
GO:0045409	negative regulation of interleukin-6 biosynthetic process	0.00931302
GO:0050859	negative regulation of B cell receptor signaling pathway	0.00931302
GO:0051462	regulation of cortisol secretion	0.00931302
GO:0060374	mast cell differentiation	0.00931302
GO:0071504	cellular response to heparin	0.00931302
GO:0072126	positive regulation of glomerular mesangial cell proliferation	0.00931302
GO:0072223	metanephric glomerular mesangium development	0.00931302
GO:0072300	positive regulation of metanephric glomerulus development	0.00931302
GO:0072656	maintenance of protein location in mitochondrion	0.00931302
GO:0071260	cellular response to mechanical stimulus	0.00931305
GO:0046777	protein autophosphorylation	0.00946769
GO:0046486	glycerolipid metabolic process	0.00949985
GO:1903901	negative regulation of viral life cycle	0.00954385
GO:0050714	positive regulation of protein secretion	0.00979934
GO:0050772	positive regulation of axonogenesis	0.0100131
GO:0046849	bone remodeling	0.0102515
GO:0030072	peptide hormone secretion	0.0103671
GO:0006836	neurotransmitter transport	0.0107168
GO:0006644	phospholipid metabolic process	0.0110192
GO:2000116	regulation of cysteine-type endopeptidase activity	0.0110733
GO:0002924	negative regulation of humoral immune response mediated by circulating immunoglobulin	0.0111655
GO:0010046	response to mycotoxin	0.0111655
GO:0032020	ISG15-protein conjugation	0.0111655
GO:0035897	proteolysis in other organism	0.0111655
GO:0060440	trachea formation	0.0111655
GO:0070141	response to UV-A	0.0111655
GO:0071503	response to heparin	0.0111655
GO:0072298	regulation of metanephric glomerulus development	0.0111655
GO:1902947	regulation of tau-protein kinase activity	0.0111655
GO:2000317	negative regulation of T-helper 17 type immune response	0.0111655
GO:2000320	negative regulation of T-helper 17 cell differentiation	0.0111655
GO:2000973	regulation of pro-B cell differentiation	0.0111655
GO:0042058	regulation of epidermal growth factor receptor signaling pathway	0.0112302
GO:1903076	regulation of protein localization to plasma membrane	0.0112302
GO:0042326	negative regulation of phosphorylation	0.01126
GO:0010951	negative regulation of endopeptidase activity	0.0113148
GO:0045639	positive regulation of myeloid cell differentiation	0.0114811
GO:0016079	synaptic vesicle exocytosis	0.0117345
GO:0045069	regulation of viral genome replication	0.0117345
GO:0051588	regulation of neurotransmitter transport	0.0122486
GO:0002793	positive regulation of peptide secretion	0.0123114
GO:0030335	positive regulation of cell migration	0.0123426
GO:0043154	negative regulation of cysteine-type endopeptidase activity involved in apoptotic process	0.0125093
GO:0046632	alpha-beta T cell differentiation	0.0125093
GO:0097327	response to antineoplastic agent	0.0125093
GO:1902106	negative regulation of leukocyte differentiation	0.0127725
GO:0051962	positive regulation of nervous system development	0.0129525
GO:0010466	negative regulation of peptidase activity	0.0129591
GO:0006701	progesterone biosynthetic process	0.0130146
GO:0010989	negative regulation of low-density lipoprotein particle clearance	0.0130146
GO:0031659	positive regulation of cyclin-dependent protein serine/threonine kinase activity involved in G1/S transition of mitotic cell cycle	0.0130146
GO:0035771	interleukin-4-mediated signaling pathway	0.0130146
GO:0036302	atrioventricular canal development	0.0130146
GO:0040016	embryonic cleavage	0.0130146
GO:0042996	regulation of Golgi to plasma membrane protein transport	0.0130146
GO:0044033	multi-organism metabolic process	0.0130146
GO:0045656	negative regulation of monocyte differentiation	0.0130146
GO:0061476	response to anticoagulant	0.0130146
GO:1901724	positive regulation of cell proliferation involved in kidney development	0.0130146
GO:1905456	regulation of lymphoid progenitor cell differentiation	0.0130146
GO:2000192	negative regulation of fatty acid transport	0.0130146
GO:2001179	regulation of interleukin-10 secretion	0.0130146
GO:0021549	cerebellum development	0.013306
GO:1904375	regulation of protein localization to cell periphery	0.013306
GO:0042035	regulation of cytokine biosynthetic process	0.0135764
GO:0048525	negative regulation of viral process	0.0135764
GO:0007229	integrin-mediated signaling pathway	0.0141244
GO:0050853	B cell receptor signaling pathway	0.0141244
GO:0051591	response to cAMP	0.0141244

## Sheet: Table S02-5
ID	Description	P_value
GO:0042110	T cell activation	1.50945e-23
GO:0050870	positive regulation of T cell activation	6.04383e-22
GO:1903039	positive regulation of leukocyte cell-cell adhesion	1.59779e-21
GO:0050863	regulation of T cell activation	2.04474e-21
GO:0051249	regulation of lymphocyte activation	6.62622e-21
GO:1903037	regulation of leukocyte cell-cell adhesion	1.70751e-20
GO:0022409	positive regulation of cell-cell adhesion	2.22875e-20
GO:0051251	positive regulation of lymphocyte activation	3.95273e-20
GO:0045785	positive regulation of cell adhesion	1.3038e-19
GO:0007159	leukocyte cell-cell adhesion	1.34084e-19
GO:0002696	positive regulation of leukocyte activation	3.37196e-19
GO:0050867	positive regulation of cell activation	6.54063e-19
GO:0022407	regulation of cell-cell adhesion	2.41884e-18
GO:0046631	alpha-beta T cell activation	1.69773e-16
GO:0046634	regulation of alpha-beta T cell activation	1.67492e-15
GO:0031295	T cell costimulation	2.65577e-15
GO:0031294	lymphocyte costimulation	3.08342e-15
GO:0042098	T cell proliferation	3.59687e-14
GO:0001819	positive regulation of cytokine production	4.75108e-14
GO:0046635	positive regulation of alpha-beta T cell activation	1.1566e-13
GO:0042129	regulation of T cell proliferation	1.53952e-13
GO:0050670	regulation of lymphocyte proliferation	2.32596e-13
GO:0032944	regulation of mononuclear cell proliferation	2.47935e-13
GO:0046651	lymphocyte proliferation	3.13082e-13
GO:0032943	mononuclear cell proliferation	3.47675e-13
GO:0070663	regulation of leukocyte proliferation	4.61156e-13
GO:0070661	leukocyte proliferation	7.80431e-13
GO:0042102	positive regulation of T cell proliferation	1.41019e-12
GO:0045086	positive regulation of interleukin-2 biosynthetic process	1.47028e-12
GO:1900076	regulation of cellular response to insulin stimulus	3.24428e-12
GO:0018108	peptidyl-tyrosine phosphorylation	3.45006e-12
GO:0018212	peptidyl-tyrosine modification	3.8617e-12
GO:0071216	cellular response to biotic stimulus	6.52831e-12
GO:0006888	ER to Golgi vesicle-mediated transport	6.91558e-12
GO:0002521	leukocyte differentiation	8.65428e-12
GO:0046626	regulation of insulin receptor signaling pathway	1.10456e-11
GO:0045088	regulation of innate immune response	1.88092e-11
GO:0042108	positive regulation of cytokine biosynthetic process	2.39193e-11
GO:0045076	regulation of interleukin-2 biosynthetic process	2.90519e-11
GO:0050671	positive regulation of lymphocyte proliferation	3.53448e-11
GO:0032946	positive regulation of mononuclear cell proliferation	3.81136e-11
GO:1903706	regulation of hemopoiesis	3.94219e-11
GO:0042035	regulation of cytokine biosynthetic process	4.79018e-11
GO:0070665	positive regulation of leukocyte proliferation	6.35635e-11
GO:0042094	interleukin-2 biosynthetic process	8.42177e-11
GO:0042089	cytokine biosynthetic process	1.19169e-10
GO:0002697	regulation of immune effector process	1.20445e-10
GO:0042107	cytokine metabolic process	1.29867e-10
GO:0070106	interleukin-27-mediated signaling pathway	2.23725e-10
GO:1901653	cellular response to peptide	2.78857e-10
GO:0030217	T cell differentiation	3.88693e-10
GO:0032743	positive regulation of interleukin-2 production	7.21062e-10
GO:0048013	ephrin receptor signaling pathway	7.78231e-10
GO:0071219	cellular response to molecule of bacterial origin	8.43551e-10
GO:0071375	cellular response to peptide hormone stimulus	8.9712e-10
GO:0002460	adaptive immune response based on somatic recombination of immune receptors built from immunoglobulin superfamily domains	9.64728e-10
GO:1901652	response to peptide	1.48016e-09
GO:1902105	regulation of leukocyte differentiation	1.5233e-09
GO:0030098	lymphocyte differentiation	1.69502e-09
GO:0050852	T cell receptor signaling pathway	2.10964e-09
GO:0032869	cellular response to insulin stimulus	2.214e-09
GO:0002683	negative regulation of immune system process	2.74581e-09
GO:0045619	regulation of lymphocyte differentiation	4.10503e-09
GO:0048193	Golgi vesicle transport	4.51659e-09
GO:0002429	immune response-activating cell surface receptor signaling pathway	5.30286e-09
GO:0035710	CD4-positive, alpha-beta T cell activation	7.08681e-09
GO:0031349	positive regulation of defense response	8.04949e-09
GO:0046640	regulation of alpha-beta T cell proliferation	9.58759e-09
GO:0071222	cellular response to lipopolysaccharide	1.06964e-08
GO:0050730	regulation of peptidyl-tyrosine phosphorylation	1.07872e-08
GO:2000514	regulation of CD4-positive, alpha-beta T cell activation	1.18276e-08
GO:0002768	immune response-regulating cell surface receptor signaling pathway	1.20276e-08
GO:0032753	positive regulation of interleukin-4 production	1.23735e-08
GO:0002223	stimulatory C-type lectin receptor signaling pathway	1.24104e-08
GO:0008286	insulin receptor signaling pathway	1.32295e-08
GO:0002821	positive regulation of adaptive immune response	1.47912e-08
GO:0002220	innate immune response activating cell surface receptor signaling pathway	1.50087e-08
GO:0045580	regulation of T cell differentiation	1.69908e-08
GO:0045621	positive regulation of lymphocyte differentiation	1.91067e-08
GO:0032496	response to lipopolysaccharide	1.94427e-08
GO:0046633	alpha-beta T cell proliferation	1.98621e-08
GO:0002819	regulation of adaptive immune response	2.03867e-08
GO:0032868	response to insulin	2.085e-08
GO:0032663	regulation of interleukin-2 production	2.27576e-08
GO:0043434	response to peptide hormone	3.00777e-08
GO:0002237	response to molecule of bacterial origin	3.36715e-08
GO:0051092	positive regulation of NF-kappaB transcription factor activity	3.62821e-08
GO:0032673	regulation of interleukin-4 production	3.74161e-08
GO:0045089	positive regulation of innate immune response	4.25475e-08
GO:0070757	interleukin-35-mediated signaling pathway	4.76937e-08
GO:0032623	interleukin-2 production	5.09712e-08
GO:2000516	positive regulation of CD4-positive, alpha-beta T cell activation	5.47388e-08
GO:0050851	antigen receptor-mediated signaling pathway	5.59233e-08
GO:0002758	innate immune response-activating signal transduction	5.78122e-08
GO:0002218	activation of innate immune response	1.0292e-07
GO:0032633	interleukin-4 production	1.08205e-07
GO:1903708	positive regulation of hemopoiesis	1.54781e-07
GO:0002449	lymphocyte mediated immunity	1.5708e-07
GO:0002822	regulation of adaptive immune response based on somatic recombination of immune receptors built from immunoglobulin superfamily domains	2.27028e-07
GO:0045582	positive regulation of T cell differentiation	2.2874e-07
GO:0050731	positive regulation of peptidyl-tyrosine phosphorylation	2.30029e-07
GO:0042088	T-helper 1 type immune response	2.58216e-07
GO:0032479	regulation of type I interferon production	2.68809e-07
GO:0032606	type I interferon production	2.841e-07
GO:0002824	positive regulation of adaptive immune response based on somatic recombination of immune receptors built from immunoglobulin superfamily domains	3.15073e-07
GO:0046641	positive regulation of alpha-beta T cell proliferation	3.38494e-07
GO:1902107	positive regulation of leukocyte differentiation	4.57887e-07
GO:0046632	alpha-beta T cell differentiation	8.52098e-07
GO:0042093	T-helper cell differentiation	1.12481e-06
GO:0046637	regulation of alpha-beta T cell differentiation	1.23858e-06
GO:0002294	CD4-positive, alpha-beta T cell differentiation involved in immune response	1.36123e-06
GO:0002287	alpha-beta T cell activation involved in immune response	1.49326e-06
GO:0002293	alpha-beta T cell differentiation involved in immune response	1.49326e-06
GO:0002285	lymphocyte activation involved in immune response	1.72986e-06
GO:0050727	regulation of inflammatory response	1.78271e-06
GO:0051090	regulation of DNA binding transcription factor activity	1.98689e-06
GO:0051091	positive regulation of DNA binding transcription factor activity	2.46199e-06
GO:0002292	T cell differentiation involved in immune response	2.51207e-06
GO:0038093	Fc receptor signaling pathway	2.53767e-06
GO:0032729	positive regulation of interferon-gamma production	2.72495e-06
GO:0002699	positive regulation of immune effector process	2.89239e-06
GO:0043367	CD4-positive, alpha-beta T cell differentiation	3.19317e-06
GO:0038095	Fc-epsilon receptor signaling pathway	3.35987e-06
GO:0045622	regulation of T-helper cell differentiation	3.76446e-06
GO:1900078	positive regulation of cellular response to insulin stimulus	3.76446e-06
GO:0046627	negative regulation of insulin receptor signaling pathway	4.31062e-06
GO:0071354	cellular response to interleukin-6	4.91327e-06
GO:0002706	regulation of lymphocyte mediated immunity	5.20983e-06
GO:1900077	negative regulation of cellular response to insulin stimulus	6.30264e-06
GO:0070741	response to interleukin-6	7.9627e-06
GO:0030260	entry into host cell	8.5011e-06
GO:0044409	entry into host	8.5011e-06
GO:0051806	entry into cell of other organism involved in symbiotic interaction	8.5011e-06
GO:0051828	entry into other organism involved in symbiotic interaction	8.5011e-06
GO:0043370	regulation of CD4-positive, alpha-beta T cell differentiation	8.90405e-06
GO:0010763	positive regulation of fibroblast migration	9.31386e-06
GO:0002708	positive regulation of lymphocyte mediated immunity	9.6367e-06
GO:0030099	myeloid cell differentiation	1.02343e-05
GO:0046638	positive regulation of alpha-beta T cell differentiation	1.10298e-05
GO:0032649	regulation of interferon-gamma production	1.80892e-05
GO:0046628	positive regulation of insulin receptor signaling pathway	1.9116e-05
GO:0002286	T cell activation involved in immune response	2.34531e-05
GO:1905475	regulation of protein localization to membrane	2.48565e-05
GO:0045637	regulation of myeloid cell differentiation	2.53162e-05
GO:0032480	negative regulation of type I interferon production	2.76636e-05
GO:0045063	T-helper 1 cell differentiation	2.84237e-05
GO:0070102	interleukin-6-mediated signaling pathway	2.84237e-05
GO:0002705	positive regulation of leukocyte mediated immunity	2.85733e-05
GO:0002703	regulation of leukocyte mediated immunity	2.94698e-05
GO:1903829	positive regulation of cellular protein localization	3.10506e-05
GO:0032609	interferon-gamma production	3.14387e-05
GO:0007249	I-kappaB kinase/NF-kappaB signaling	3.44058e-05
GO:0045624	positive regulation of T-helper cell differentiation	4.02979e-05
GO:0045787	positive regulation of cell cycle	5.58066e-05
GO:1905477	positive regulation of protein localization to membrane	6.07019e-05
GO:0061564	axon development	6.33377e-05
GO:0002825	regulation of T-helper 1 type immune response	6.35565e-05
GO:0046718	viral entry into host cell	6.58075e-05
GO:0002228	natural killer cell mediated immunity	7.49208e-05
GO:0048207	vesicle targeting, rough ER to cis-Golgi	7.97027e-05
GO:0048208	COPII vesicle coating	7.97027e-05
GO:0050729	positive regulation of inflammatory response	8.0025e-05
GO:0060330	regulation of response to interferon-gamma	8.31071e-05
GO:0060334	regulation of interferon-gamma-mediated signaling pathway	8.31071e-05
GO:0038061	NIK/NF-kappaB signaling	8.6331e-05
GO:0043372	positive regulation of CD4-positive, alpha-beta T cell differentiation	9.41997e-05
GO:0006901	vesicle coating	0.000101074
GO:0051701	interaction with host	0.000104621
GO:0032945	negative regulation of mononuclear cell proliferation	0.000107008
GO:0050672	negative regulation of lymphocyte proliferation	0.000107008
GO:0051348	negative regulation of transferase activity	0.000112416
GO:0097061	dendritic spine organization	0.000113191
GO:0090114	COPII-coated vesicle budding	0.00011963
GO:0002249	lymphocyte anergy	0.000124485
GO:0002667	regulation of T cell anergy	0.000124485
GO:0002870	T cell anergy	0.000124485
GO:0002911	regulation of lymphocyte anergy	0.000124485
GO:0048199	vesicle targeting, to, from or within Golgi	0.000126329
GO:0070664	negative regulation of leukocyte proliferation	0.000133297
GO:0106027	neuron projection organization	0.000133297
GO:0002828	regulation of type 2 immune response	0.00016418
GO:0098760	response to interleukin-7	0.000181309
GO:0098761	cellular response to interleukin-7	0.000181309
GO:0021631	optic nerve morphogenesis	0.000186297
GO:0046777	protein autophosphorylation	0.000188243
GO:0002673	regulation of acute inflammatory response	0.000189852
GO:0048194	Golgi vesicle budding	0.000190112
GO:0010762	regulation of fibroblast migration	0.000199557
GO:0007409	axonogenesis	0.000207818
GO:0001818	negative regulation of cytokine production	0.000235752
GO:0006891	intra-Golgi vesicle-mediated transport	0.000239534
GO:0032148	activation of protein kinase B activity	0.000239534
GO:0051897	positive regulation of protein kinase B signaling	0.000242112
GO:0007411	axon guidance	0.000251707
GO:0002666	positive regulation of T cell tolerance induction	0.000260215
GO:0045630	positive regulation of T-helper 2 cell differentiation	0.000260215
GO:0045916	negative regulation of complement activation	0.000260215
GO:2000258	negative regulation of protein activation cascade	0.000260215
GO:2000394	positive regulation of lamellipodium morphogenesis	0.000260215
GO:0010742	macrophage derived foam cell differentiation	0.000261326
GO:0090077	foam cell differentiation	0.000261326
GO:0006903	vesicle targeting	0.000262619
GO:0048145	regulation of fibroblast proliferation	0.000262619
GO:0097485	neuron projection guidance	0.000262807
GO:0000079	regulation of cyclin-dependent protein serine/threonine kinase activity	0.000274393
GO:0045638	negative regulation of myeloid cell differentiation	0.000274393
GO:0048144	fibroblast proliferation	0.000274393
GO:0042092	type 2 immune response	0.000308663
GO:1904029	regulation of cyclin-dependent protein kinase activity	0.000339022
GO:0007172	signal complex assembly	0.000346155
GO:0031658	negative regulation of cyclin-dependent protein serine/threonine kinase activity involved in G1/S transition of mitotic cell cycle	0.000346155
GO:0007259	JAK-STAT cascade	0.000388939
GO:0006900	vesicle budding from membrane	0.000398056
GO:0097696	STAT cascade	0.000409845
GO:0002645	positive regulation of tolerance induction	0.000444033
GO:0051974	negative regulation of telomerase activity	0.000444033
GO:0048511	rhythmic process	0.000445397
GO:0010761	fibroblast migration	0.000450285
GO:0032459	regulation of protein oligomerization	0.000450285
GO:2000278	regulation of DNA biosynthetic process	0.000464099
GO:0046854	phosphatidylinositol phosphorylation	0.000481758
GO:0099173	postsynapse organization	0.000481758
GO:0046326	positive regulation of glucose import	0.000482829
GO:0051052	regulation of DNA metabolic process	0.00053205
GO:0002698	negative regulation of immune effector process	0.00053761
GO:0045646	regulation of erythrocyte differentiation	0.000552356
GO:0002664	regulation of T cell tolerance induction	0.000553765
GO:0002863	positive regulation of inflammatory response to antigenic stimulus	0.000553765
GO:0045060	negative thymic T cell selection	0.000553765
GO:0045625	regulation of T-helper 1 cell differentiation	0.000553765
GO:0097193	intrinsic apoptotic signaling pathway	0.000578155
GO:0002712	regulation of B cell mediated immunity	0.000589394
GO:0002889	regulation of immunoglobulin mediated immune response	0.000589394
GO:0031343	positive regulation of cell killing	0.000589394
GO:0051972	regulation of telomerase activity	0.000589394
GO:0050732	negative regulation of peptidyl-tyrosine phosphorylation	0.000627984
GO:0031098	stress-activated protein kinase signaling cascade	0.000643685
GO:0002381	immunoglobulin production involved in immunoglobulin mediated immune response	0.000668152
GO:0010828	positive regulation of glucose transmembrane transport	0.000668152
GO:0002921	negative regulation of humoral immune response	0.000675267
GO:0021554	optic nerve development	0.000675267
GO:0042532	negative regulation of tyrosine phosphorylation of STAT protein	0.000675267
GO:0043383	negative T cell selection	0.000675267
GO:0045628	regulation of T-helper 2 cell differentiation	0.000675267
GO:2000392	regulation of lamellipodium morphogenesis	0.000675267
GO:0071229	cellular response to acid chemical	0.000732513
GO:0046834	lipid phosphorylation	0.000732724
GO:0002700	regulation of production of molecular mediator of immune response	0.000757114
GO:0001667	ameboidal-type cell migration	0.000783195
GO:0060997	dendritic spine morphogenesis	0.000798377
GO:0002517	T cell tolerance induction	0.000808458
GO:0045078	positive regulation of interferon-gamma biosynthetic process	0.000808458
GO:0048302	regulation of isotype switching to IgG isotypes	0.000808458
GO:0009615	response to virus	0.000819061
GO:0001933	negative regulation of protein phosphorylation	0.000885133
GO:0071897	DNA biosynthetic process	0.000892695
GO:0038083	peptidyl-tyrosine autophosphorylation	0.000893547
GO:0048146	positive regulation of fibroblast proliferation	0.000893547
GO:0071398	cellular response to fatty acid	0.000893547
GO:0019058	viral life cycle	0.000904652
GO:0001771	immunological synapse formation	0.000953255
GO:0045579	positive regulation of B cell differentiation	0.000953255
GO:0048291	isotype switching to IgG isotypes	0.000953255
GO:0042130	negative regulation of T cell proliferation	0.000995629
GO:0070228	regulation of lymphocyte apoptotic process	0.000995629
GO:0002526	acute inflammatory response	0.00101312
GO:0016358	dendrite development	0.00103431
GO:0051896	regulation of protein kinase B signaling	0.00107767
GO:0002831	regulation of response to biotic stimulus	0.00109629
GO:0032147	activation of protein kinase activity	0.00109644
GO:0032688	negative regulation of interferon-beta production	0.00110958
GO:0045064	T-helper 2 cell differentiation	0.00110958
GO:0001101	response to acid chemical	0.00111373
GO:0051054	positive regulation of DNA metabolic process	0.00112237
GO:0019882	antigen processing and presentation	0.00114523
GO:0002440	production of molecular mediator of immune response	0.00119199
GO:0006968	cellular defense response	0.00122128
GO:1904951	positive regulation of establishment of protein localization	0.00125522
GO:0051250	negative regulation of lymphocyte activation	0.00126483
GO:0002827	positive regulation of T-helper 1 type immune response	0.00127734
GO:0002830	positive regulation of type 2 immune response	0.00127734
GO:0031657	regulation of cyclin-dependent protein serine/threonine kinase activity involved in G1/S transition of mitotic cell cycle	0.00127734
GO:0048813	dendrite morphogenesis	0.00133706
GO:0042326	negative regulation of phosphorylation	0.00143695
GO:0002643	regulation of tolerance induction	0.00145646
GO:0045056	transcytosis	0.00145646
GO:0045072	regulation of interferon-gamma biosynthetic process	0.00145646
GO:0007030	Golgi organization	0.00153018
GO:0019915	lipid storage	0.00154551
GO:2000573	positive regulation of DNA biosynthetic process	0.00154551
GO:0050777	negative regulation of immune response	0.0016126
GO:0033077	T cell differentiation in thymus	0.00161619
GO:0070374	positive regulation of ERK1 and ERK2 cascade	0.00161868
GO:0032460	negative regulation of protein oligomerization	0.00164687
GO:0042095	interferon-gamma biosynthetic process	0.00164687
GO:0072673	lamellipodium morphogenesis	0.00164687
GO:1900273	positive regulation of long-term synaptic potentiation	0.00164687
GO:2001275	positive regulation of glucose import in response to insulin stimulus	0.00164687
GO:1903707	negative regulation of hemopoiesis	0.00165495
GO:0046324	regulation of glucose import	0.00168887
GO:0045913	positive regulation of carbohydrate metabolic process	0.0018403
GO:0050688	regulation of defense response to virus	0.0018403
GO:0035743	CD4-positive, alpha-beta T cell cytokine production	0.00184847
GO:0042994	cytoplasmic sequestering of transcription factor	0.00184847
GO:0045931	positive regulation of mitotic cell cycle	0.00192542
GO:0051650	establishment of vesicle localization	0.00193688
GO:0007050	cell cycle arrest	0.00197104
GO:0070227	lymphocyte apoptotic process	0.00199994
GO:0043491	protein kinase B signaling	0.00204069
GO:0035994	response to muscle stretch	0.0020612
GO:0036035	osteoclast development	0.0020612
GO:0045061	thymic T cell selection	0.0020612
GO:0031341	regulation of cell killing	0.0020829
GO:0002695	negative regulation of leukocyte activation	0.00222511
GO:0032481	positive regulation of type I interferon production	0.00225517
GO:0060291	long-term synaptic potentiation	0.00225517
GO:0031290	retinal ganglion cell axon guidance	0.00228497
GO:0051648	vesicle localization	0.00237662
GO:0050864	regulation of B cell activation	0.00244192
GO:0006469	negative regulation of protein kinase activity	0.00245644
GO:0002861	regulation of inflammatory response to antigenic stimulus	0.0025197
GO:0051403	stress-activated MAPK cascade	0.0026219
GO:0042509	regulation of tyrosine phosphorylation of STAT protein	0.00262565
GO:0043900	regulation of multi-organism process	0.00266447
GO:0010827	regulation of glucose transmembrane transport	0.00272378
GO:1901216	positive regulation of neuron death	0.00272378
GO:2001273	regulation of glucose import in response to insulin stimulus	0.00276531
GO:0046323	glucose import	0.00282415
GO:0050807	regulation of synapse organization	0.00285561
GO:0007260	tyrosine phosphorylation of STAT protein	0.00292678
GO:0046427	positive regulation of JAK-STAT cascade	0.00292678
GO:0010769	regulation of cell morphogenesis involved in differentiation	0.00297694
GO:0021952	central nervous system projection neuron axonogenesis	0.00302173
GO:0045954	positive regulation of natural killer cell mediated cytotoxicity	0.00302173
GO:0055093	response to hyperoxia	0.00302173
GO:1904385	cellular response to angiotensin	0.00302173
GO:0000082	G1/S transition of mitotic cell cycle	0.00302365
GO:0002456	T cell mediated immunity	0.00303167
GO:0070542	response to fatty acid	0.00303167
GO:0090068	positive regulation of cell cycle process	0.00307088
GO:0072332	intrinsic apoptotic signaling pathway by p53 class mediator	0.00313886
GO:1904894	positive regulation of STAT cascade	0.00313886
GO:0006890	retrograde vesicle-mediated transport, Golgi to ER	0.00324835
GO:1901214	regulation of neuron death	0.00326519
GO:0002507	tolerance induction	0.00328888
GO:0044381	glucose import in response to insulin stimulus	0.00328888
GO:0051220	cytoplasmic sequestering of protein	0.00328888
GO:0001959	regulation of cytokine-mediated signaling pathway	0.003315
GO:0050707	regulation of cytokine secretion	0.003315
GO:2000106	regulation of leukocyte apoptotic process	0.00336016
GO:0033673	negative regulation of kinase activity	0.0033656
GO:0050866	negative regulation of cell activation	0.00338449
GO:0002367	cytokine production involved in immune response	0.0034743
GO:2000045	regulation of G1/S transition of mitotic cell cycle	0.00352645
GO:0002230	positive regulation of defense response to virus by host	0.00356668
GO:1903076	regulation of protein localization to plasma membrane	0.0035908
GO:0050803	regulation of synapse structure or activity	0.00359893
GO:0032103	positive regulation of response to external stimulus	0.00368021
GO:0002717	positive regulation of natural killer cell mediated immunity	0.00385505
GO:1902745	positive regulation of lamellipodium organization	0.00385505
GO:1990776	response to angiotensin	0.00385505
GO:0060759	regulation of response to cytokine stimulus	0.003899
GO:0060333	interferon-gamma-mediated signaling pathway	0.00395455
GO:0007219	Notch signaling pathway	0.00397658
GO:0044843	cell cycle G1/S phase transition	0.00401546
GO:0060840	artery development	0.0040806
GO:0060996	dendritic spine development	0.0040806
GO:0051222	positive regulation of protein transport	0.00410668
GO:0031954	positive regulation of protein autophosphorylation	0.00415392
GO:0002675	positive regulation of acute inflammatory response	0.00446321
GO:0021602	cranial nerve morphogenesis	0.00446321
GO:0045577	regulation of B cell differentiation	0.00446321
GO:0031348	negative regulation of defense response	0.00446419
GO:0034764	positive regulation of transmembrane transport	0.00446419
GO:1904375	regulation of protein localization to cell periphery	0.00460919
GO:0010743	regulation of macrophage derived foam cell differentiation	0.00478284
GO:0021955	central nervous system neuron axonogenesis	0.00478284
GO:0045589	regulation of regulatory T cell differentiation	0.00478284
GO:0043254	regulation of protein complex assembly	0.00480082
GO:0002573	myeloid leukocyte differentiation	0.00481078
GO:0010810	regulation of cell-substrate adhesion	0.00481078
GO:0070555	response to interleukin-1	0.00490018
GO:0032102	negative regulation of response to external stimulus	0.00494875
GO:1902806	regulation of cell cycle G1/S phase transition	0.00499069
GO:0070372	regulation of ERK1 and ERK2 cascade	0.00501601
GO:0032733	positive regulation of interleukin-10 production	0.00511275
GO:0036296	response to increased oxygen levels	0.00511275
GO:0038111	interleukin-7-mediated signaling pathway	0.00511275
GO:0045191	regulation of isotype switching	0.00511275
GO:0045648	positive regulation of erythrocyte differentiation	0.00511275
GO:0051354	negative regulation of oxidoreductase activity	0.00511275
GO:1900739	regulation of protein insertion into mitochondrial membrane involved in apoptotic signaling pathway	0.00511275
GO:1900740	positive regulation of protein insertion into mitochondrial membrane involved in apoptotic signaling pathway	0.00511275
GO:0050663	cytokine secretion	0.00526895
GO:0051656	establishment of organelle localization	0.00529063
GO:0070997	neuron death	0.00536206
GO:0016064	immunoglobulin mediated immune response	0.00536397
GO:0045066	regulatory T cell differentiation	0.00545285
GO:0045736	negative regulation of cyclin-dependent protein serine/threonine kinase activity	0.00545285
GO:0019724	B cell mediated immunity	0.00546014
GO:0050868	negative regulation of T cell activation	0.00547667
GO:0070498	interleukin-1-mediated signaling pathway	0.00547667
GO:0031589	cell-substrate adhesion	0.00557765
GO:0002495	antigen processing and presentation of peptide antigen via MHC class II	0.00563012
GO:0002504	antigen processing and presentation of peptide or polysaccharide antigen via MHC class II	0.00578613
GO:0071887	leukocyte apoptotic process	0.00578613
GO:0001844	protein insertion into mitochondrial membrane involved in apoptotic signaling pathway	0.00580307
GO:0002714	positive regulation of B cell mediated immunity	0.00580307
GO:0002891	positive regulation of immunoglobulin mediated immune response	0.00580307
GO:0043276	anoikis	0.00580307
GO:0045730	respiratory burst	0.00580307
GO:0007265	Ras protein signal transduction	0.00606185
GO:0010907	positive regulation of glucose metabolic process	0.00616333
GO:0032885	regulation of polysaccharide biosynthetic process	0.00616333
GO:1900271	regulation of long-term synaptic potentiation	0.00616333
GO:1904030	negative regulation of cyclin-dependent protein kinase activity	0.00616333
GO:0031667	response to nutrient levels	0.00618743
GO:0070371	ERK1 and ERK2 cascade	0.00626125
GO:0006959	humoral immune response	0.00634069
GO:0007584	response to nutrient	0.00637805
GO:0022604	regulation of cell morphogenesis	0.00637936
GO:0001952	regulation of cell-matrix adhesion	0.00643604
GO:0002369	T cell cytokine production	0.00653357
GO:0051443	positive regulation of ubiquitin-protein transferase activity	0.00653357
GO:0070232	regulation of T cell apoptotic process	0.00653357
GO:0070670	response to interleukin-4	0.00653357
GO:0007160	cell-matrix adhesion	0.00659512
GO:0009612	response to mechanical stimulus	0.00659512
GO:0010811	positive regulation of cell-substrate adhesion	0.00660505
GO:0030218	erythrocyte differentiation	0.00660505
GO:0045444	fat cell differentiation	0.00670547
GO:1904659	glucose transmembrane transport	0.00677668
GO:0033002	muscle cell proliferation	0.00681704
GO:0051204	protein insertion into mitochondrial membrane	0.0069137
GO:0098751	bone cell development	0.0069137
GO:0016049	cell growth	0.00698129
GO:0035690	cellular response to drug	0.00726198
GO:0045737	positive regulation of cyclin-dependent protein serine/threonine kinase activity	0.00730367
GO:0050850	positive regulation of calcium-mediated signaling	0.00730367
GO:2000279	negative regulation of DNA biosynthetic process	0.00730367
GO:0005976	polysaccharide metabolic process	0.00730746
GO:1902749	regulation of cell cycle G2/M phase transition	0.00739342
GO:1903038	negative regulation of leukocyte cell-cell adhesion	0.00748971
GO:0043405	regulation of MAP kinase activity	0.00761909
GO:0030335	positive regulation of cell migration	0.00762359
GO:0071156	regulation of cell cycle arrest	0.00767464
GO:1903749	positive regulation of establishment of protein localization to mitochondrion	0.00767464
GO:0001912	positive regulation of leukocyte mediated cytotoxicity	0.00770338
GO:0032881	regulation of polysaccharide metabolic process	0.00770338
GO:0042269	regulation of natural killer cell mediated cytotoxicity	0.00770338
GO:0070423	nucleotide-binding oligomerization domain containing signaling pathway	0.00770338
GO:0008645	hexose transmembrane transport	0.00786226
GO:0046488	phosphatidylinositol metabolic process	0.00800115
GO:0034101	erythrocyte homeostasis	0.00805258
GO:0035872	nucleotide-binding domain, leucine rich repeat containing receptor signaling pathway	0.00811278
GO:0050691	regulation of defense response to virus by host	0.00811278
GO:1901030	positive regulation of mitochondrial outer membrane permeabilization involved in apoptotic signaling pathway	0.00811278
GO:0015749	monosaccharide transmembrane transport	0.0082456
GO:0050715	positive regulation of cytokine secretion	0.0082456
GO:0009991	response to extracellular stimulus	0.00830775
GO:0051607	defense response to virus	0.00838113
GO:0031346	positive regulation of cell projection organization	0.0084672
GO:0033146	regulation of intracellular estrogen receptor signaling pathway	0.00853178
GO:0071902	positive regulation of protein serine/threonine kinase activity	0.00866423
GO:0000302	response to reactive oxygen species	0.00877279
GO:0034219	carbohydrate transmembrane transport	0.00884098
GO:0050871	positive regulation of B cell activation	0.00884098
GO:0002715	regulation of natural killer cell mediated immunity	0.00896032
GO:0014911	positive regulation of smooth muscle cell migration	0.00896032
GO:0097028	dendritic cell differentiation	0.00896032
GO:1904031	positive regulation of cyclin-dependent protein kinase activity	0.00896032
GO:0045598	regulation of fat cell differentiation	0.00925159
GO:0010955	negative regulation of protein processing	0.00939833
GO:1903318	negative regulation of protein maturation	0.00939833
GO:0030010	establishment of cell polarity	0.00967321
GO:0072659	protein localization to plasma membrane	0.00973288
GO:0019216	regulation of lipid metabolic process	0.00980515
GO:0002204	somatic recombination of immunoglobulin genes involved in immune response	0.00984573
GO:0002208	somatic diversification of immunoglobulins involved in immune response	0.00984573
GO:0031952	regulation of protein autophosphorylation	0.00984573
GO:0045190	isotype switching	0.00984573
GO:0002437	inflammatory response to antigenic stimulus	0.0103025
GO:0010883	regulation of lipid storage	0.0103025
GO:0022602	ovulation cycle process	0.0103025
GO:2000725	regulation of cardiac muscle cell differentiation	0.0103025
GO:1903747	regulation of establishment of protein localization to mitochondrion	0.0103264
